# Supplementary material for: Kinetic vs. thermodynamic control of β-functionalized cyclic ketones: a theoretical investigation of regioselective formation of enolates
Source: Royal Society of Chemistry journal article supplement (doi:10.1039/d2qo01343f), 2022-01-01
Supplement: d2qo01343f1.pdf [file d2qo01343f1.pdf]

Supporting Information

**Kinetic *vs* Thermodynamic Control on  
 $\beta$ -functionalized Cyclic Ketones:  
A Theoretical Investigation on Regioselective  
Formation of Enolates**

Manuel Petroselli\*, Corrado Bacchiocchi



# Table of Contents

---

|      |                                                                                                 |    |
|------|-------------------------------------------------------------------------------------------------|----|
| 1.   | General Information & Computational Details.....                                                | 4  |
| 2.   | Schemes & Mechanisms .....                                                                      | 5  |
| 3.   | Computational Studies.....                                                                      | 8  |
| 3.1  | Steric Hindrance on <b>1-3</b> .....                                                            | 8  |
| 3.2  | Steric Hindrance on <b>4-6</b> .....                                                            | 8  |
| 3.3  | Steric Hindrance on <b>LHMDS</b> and <b>KHMDS</b> .....                                         | 9  |
| 3.4  | Electrostatic Potential Surface (ESP) Map on <b>4-6</b> .....                                   | 10 |
| 3.5  | TS Conformational Study on Ketone <b>2</b> and <b>3</b> .....                                   | 11 |
| 3.6  | Conformational Study on Enolates from <b>4</b> .....                                            | 13 |
| 3.7  | Transition State (TS) Study with $(\text{Me}_3\text{Si})_2\text{N}^-$ (No Counter Cation) ..... | 14 |
| 3.8  | Transition State (TS) Study with <b>LHMDS</b> .....                                             | 20 |
| 3.9  | Transition State (TS) Study with <b>KHMDS</b> .....                                             | 23 |
| 3.10 | Comparison Li-TS vs K-TS.....                                                                   | 25 |
| 3.11 | Cartesian Coordinates for Optimized Systems .....                                               | 29 |
| 4.   | References .....                                                                                | 74 |

# 1. General Information & Computational Details

---

Ab initio and density functional calculations were performed using the Gaussian09 program package.<sup>[1]</sup> Optimization of all the cyclohexanone derivatives has been performed at B3LYP/6-31G(d,p) level of theory in gas phase. All structures were subjected to a full conformational search, wherein  $sp^2$  and  $sp^3$  hybridized groups were rotated by 180 and 120°, respectively. Moreover, chair conformation showed higher stability with respect to the boat conformation as largely reported in literature for cyclohexanone derivatives. Therefore, all the systems have been studied assuming the chair conformation. Conformational study on enolates has been performed at B3LYP/6-311+G(d,p) level of theory. Frequencies were calculated and checked out to make sure that all of them were positive and no imaginary frequencies were present. TS calculations for the deprotonation of cyclohexanone derivatives have been performed at the B3LYP/6-31G(d,p) level of theory in gas phase as previously described for theoretical optimizations. Unlike what we have previously mentioned, frequencies were calculated and checked out to make sure that one and only one was negative for each TS calculation, confirming a saddle point. Activation energy ( $E_a$ ) from TS study with  $(Me_3Si)_2N^-$  (LHMDS with no counter cation) are shown as averaged value considering the two hydrogens from thermodynamic and kinetic position (see Section 3.7 for details). Also, flipping geometry has been considered in ketone **2** and **3** and the relative averaged  $E_a$  was calculated taking in account the Boltzmann distribution derived by the relative stability between the initial ground state structures (see Section 3.5 for details). Zero-point energy (ZPE) was included in each result.

## 2. Schemes & Mechanisms

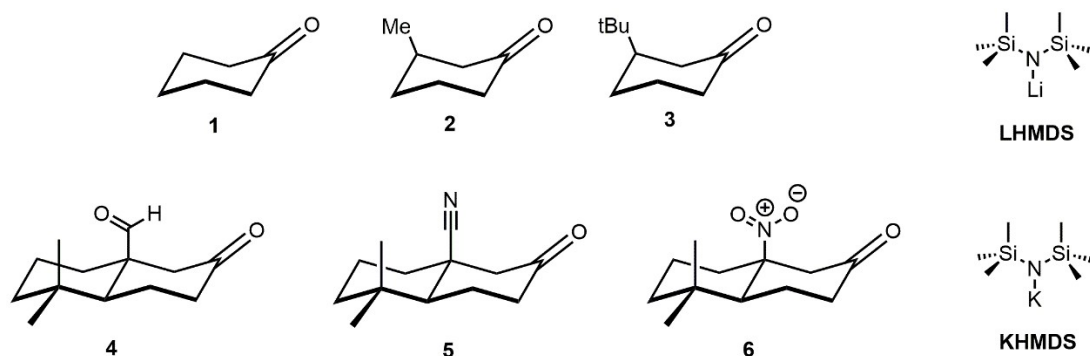

**Scheme S1:**  $\beta$ -substituted cyclic ketones 1-6 (left) and hindered bases (right) involved in this study.

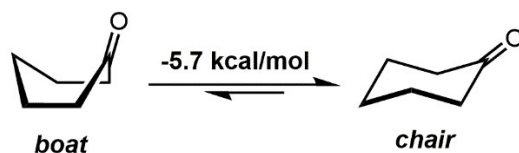

**Scheme S2:** Relative stabilization energy ( $\Delta E$ ) in the cyclohexanone between *boat* and *chair* conformation.<sup>2</sup>

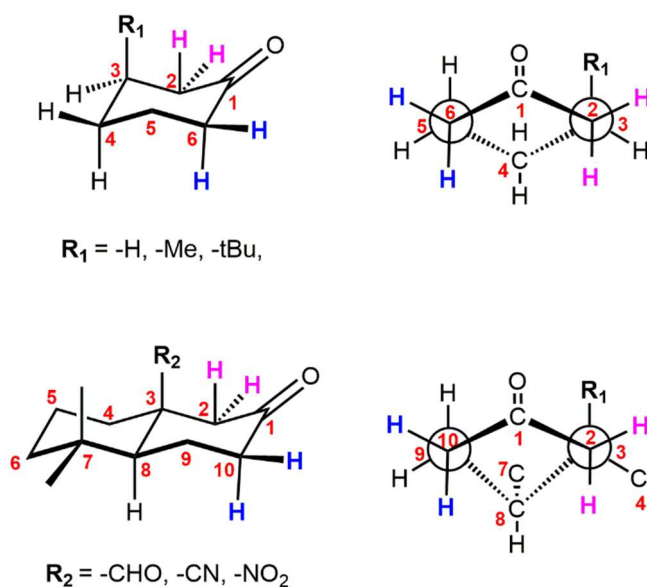

**Scheme S3:** Structures (in perspective) and Newman projections of model  $\beta$ -functionalized cyclohexanone (top) and bicyclic ketone (bottom). Hydrogens from "thermodynamic" and "kinetic position" are marked in pink and blue, respectively.

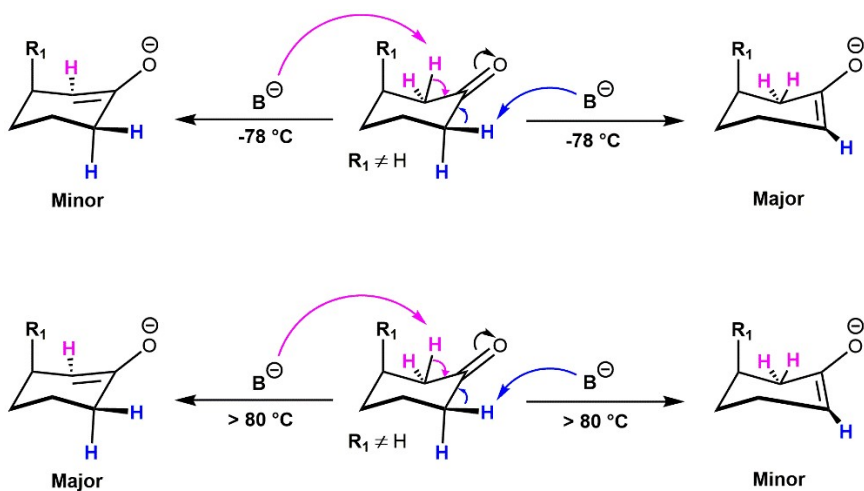

**Scheme S4:** Enolate formation mechanism on  $\beta$ -functionalized cyclohexanones under kinetic (top) and thermodynamic condition (bottom) using a generic hindered base ( $B^-$ ).

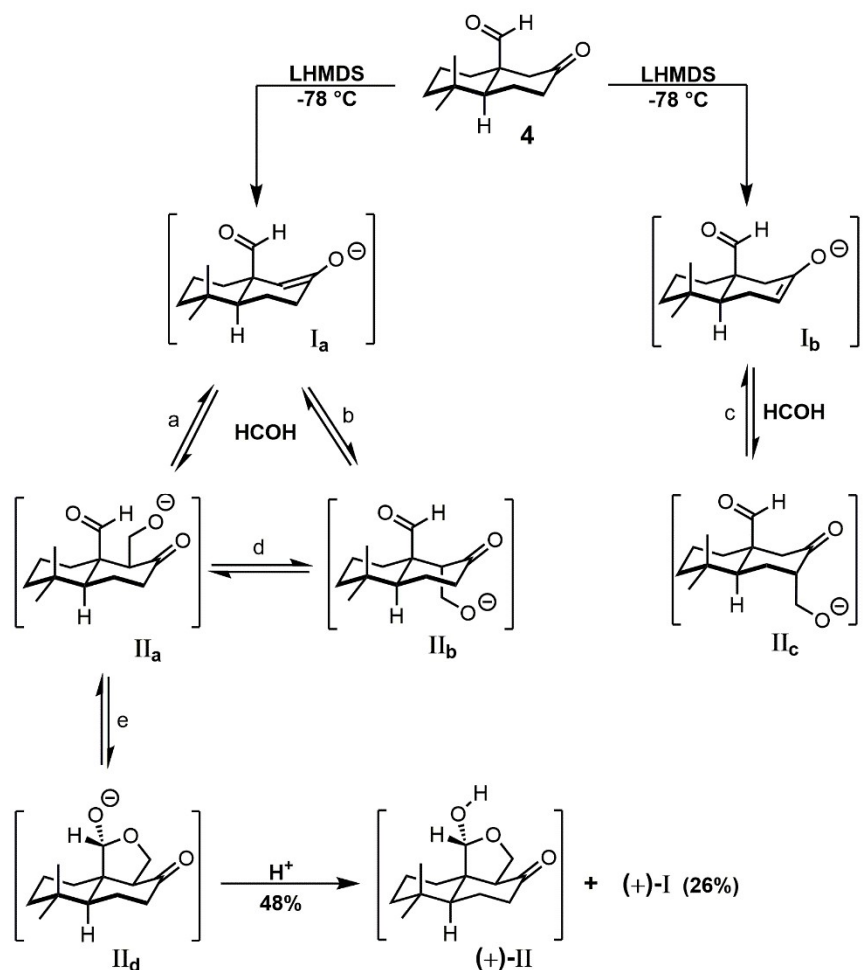

**Scheme S5:** Kinetic-controlled aldol addition on **4** with monomeric formaldehyde as reported by Angamuthu *et al.* [3]

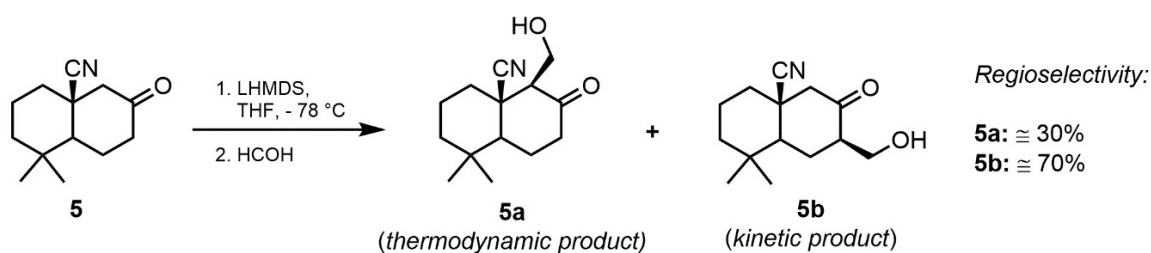

**Scheme S6:** Kinetic-controlled aldol addition on **5** with monomeric formaldehyde as reported by Angamuthu *et al.* [3]

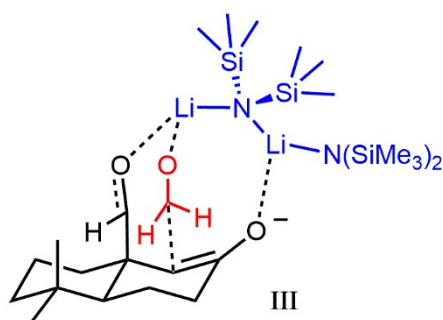

**Key Points:**

1. TS **III** requires formaldehyde in solution to be formed.
2. Formation of the “thermodynamic enolate” must be observed after LHMDS addition and before the addition of HCOH. Authors added HCOH after 5h from LHMDS addition.
3. LHMDS dimerization (blue structure), proposed by the authors, is not plausible due to steric hindrance (see Figure S3 and Table S1).
4. TS **III** does not explain the regio-control towards **I<sub>a</sub>** with respect to **I<sub>b</sub>** (see Scheme S5)
5. TS **III** could explain the stereo-control towards **II<sub>a</sub>** with respect to **II<sub>b</sub>**, although the equilibrium between them, reported by the authors, cannot exist because they are epimers (see Scheme S5).

**Scheme S7.** Chelating TS structure **III** as reported by Angamuthu *et al.* to explain the unusual reactivity observed in ketone **4** (top). [3] Key points related to TS **III** (bottom) Ketone **4** is marked in black while formaldehyde (HCOH) and LHMDS (dimer) in red and blue, respectively.

### 3. Computational Studies

---

#### 3.1 Steric Hindrance on 1-3

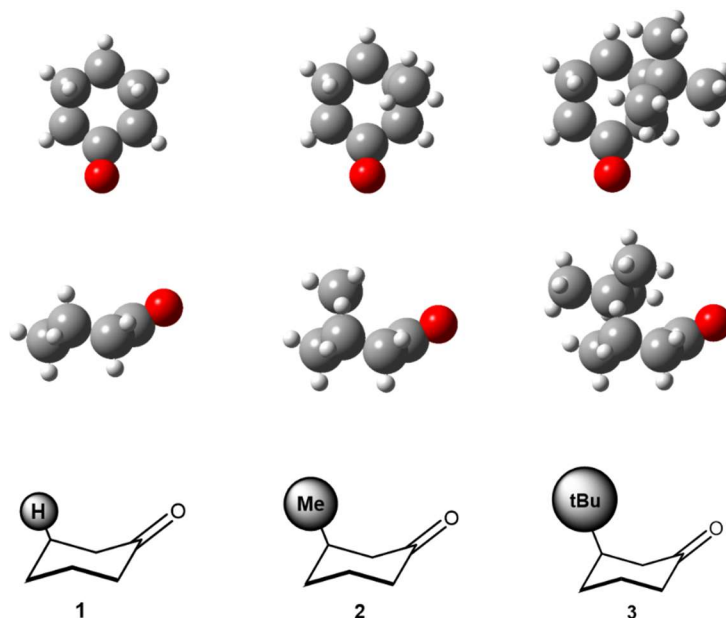

**Figure S1.** Size comparison of the substituent in  $\beta$ -position in 1-3. Top (top) and side view (middle) of optimized 1-3 are shown considering van der Waals radii for each atom.

#### 3.2 Steric Hindrance on 4-6

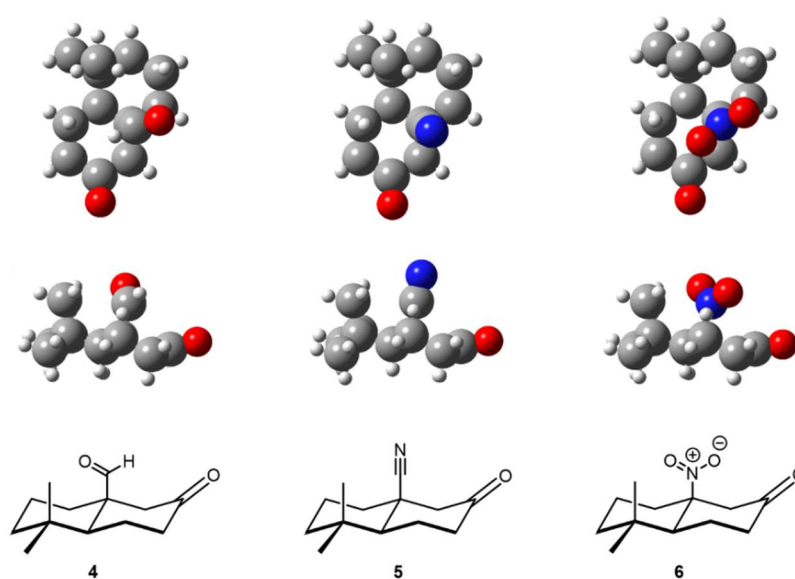

**Figure S2.** Size comparison of the substituent in  $\beta$ -position in 4-6. Top view (top) and side view (middle) of 1-3 are shown considering van der Waals radii for each atom.



### 3.3 Steric Hindrance on LHMDS and KHMDS

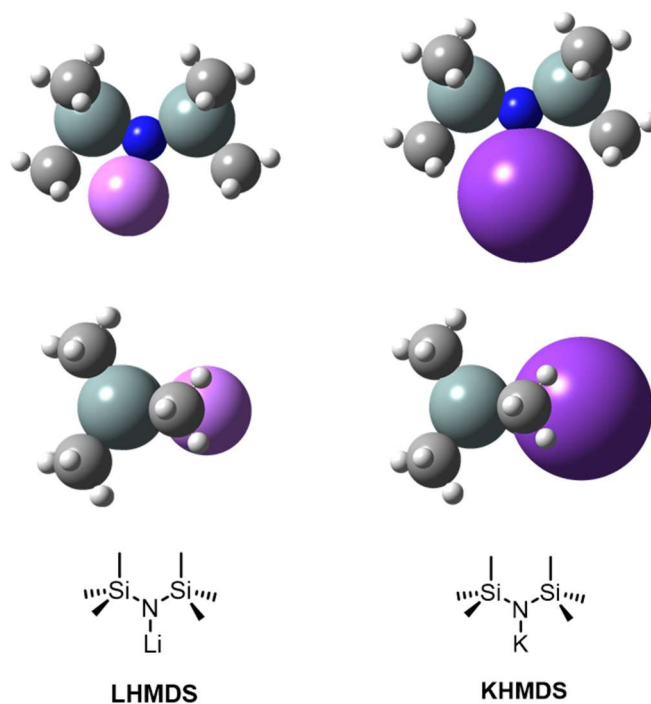

**Figure S3.** Size comparison in bases LHMDS (left) and KHMDS (right). Top view (top) and side view (middle) of LHMDS and KHMDS are shown considering van der Waals radii for each atom.

| Bond              | Length (Å) |         |
|-------------------|------------|---------|
|                   | LHMDS      | KHMDS   |
| N-M <sup>+1</sup> | 1.80687    | 2.53653 |
| N-Si <sup>a</sup> | 1.70240    | 1.68617 |
| Si-C <sup>a</sup> | 1.90965    | 1.91450 |
| C-H <sup>a</sup>  | 1.09727    | 1.09758 |

**Table S1.** Bond length (Å) in LHMDS and KHMDS calculated at B3LYP/6-31G(d,p) level of theory. M<sup>+1</sup> corresponds to Li<sup>+</sup> and K<sup>+</sup>. <sup>a</sup>Averaged value.

### 3.4 Electrostatic Potential Surface (ESP) Map on 4-6

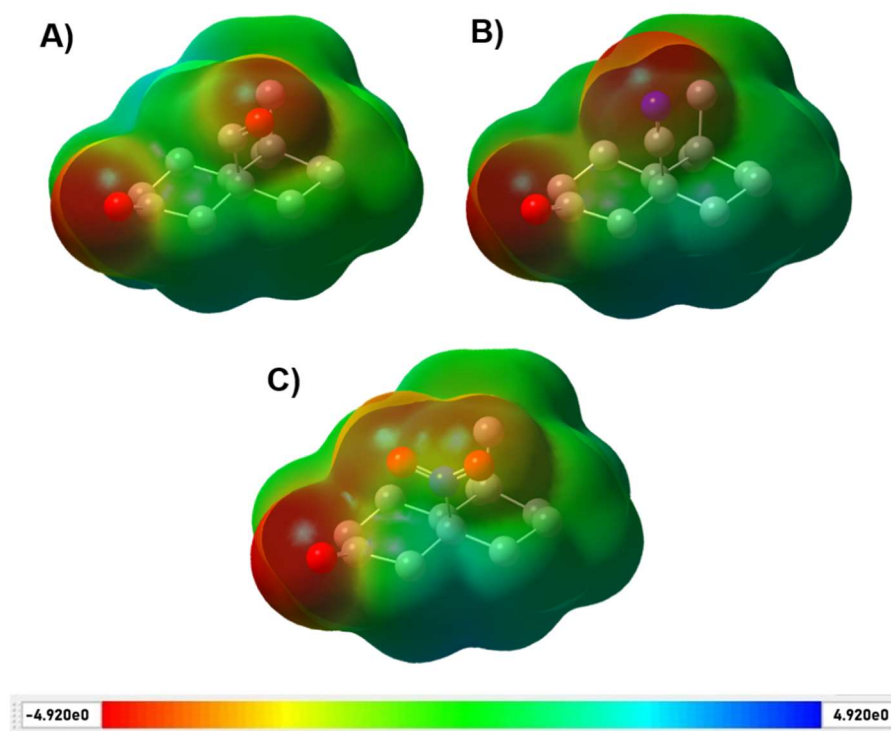

**Figure S4.** Electrostatic Potential Surface (ESP) Map calculated at B3LYP/6-31G(d,p) for A) **4**, B) **5** and C) **6**. Hydrogens have been hidden for better clarity.

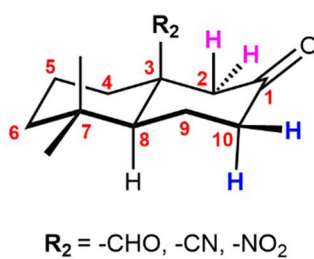

| Compound | Mulliken Atom Charges (MAC) |                          |
|----------|-----------------------------|--------------------------|
|          | T-Hydrogens <sup>a</sup>    | K-Hydrogens <sup>a</sup> |
| <b>4</b> | 0.128579                    | 0.121466                 |
| <b>5</b> | 0.129280                    | 0.122175                 |
| <b>6</b> | 0.137776                    | 0.119956                 |

**Table S2.** Mulliken atom charges for T- and K-hydrogens in ketones **4-6** (marked in pink and blue, respectively) calculated at B3LYP/6-31G(d,p) level of theory. <sup>a</sup>Averaged value is reported.

### 3.5 TS Conformational Study on Ketone 2 and 3

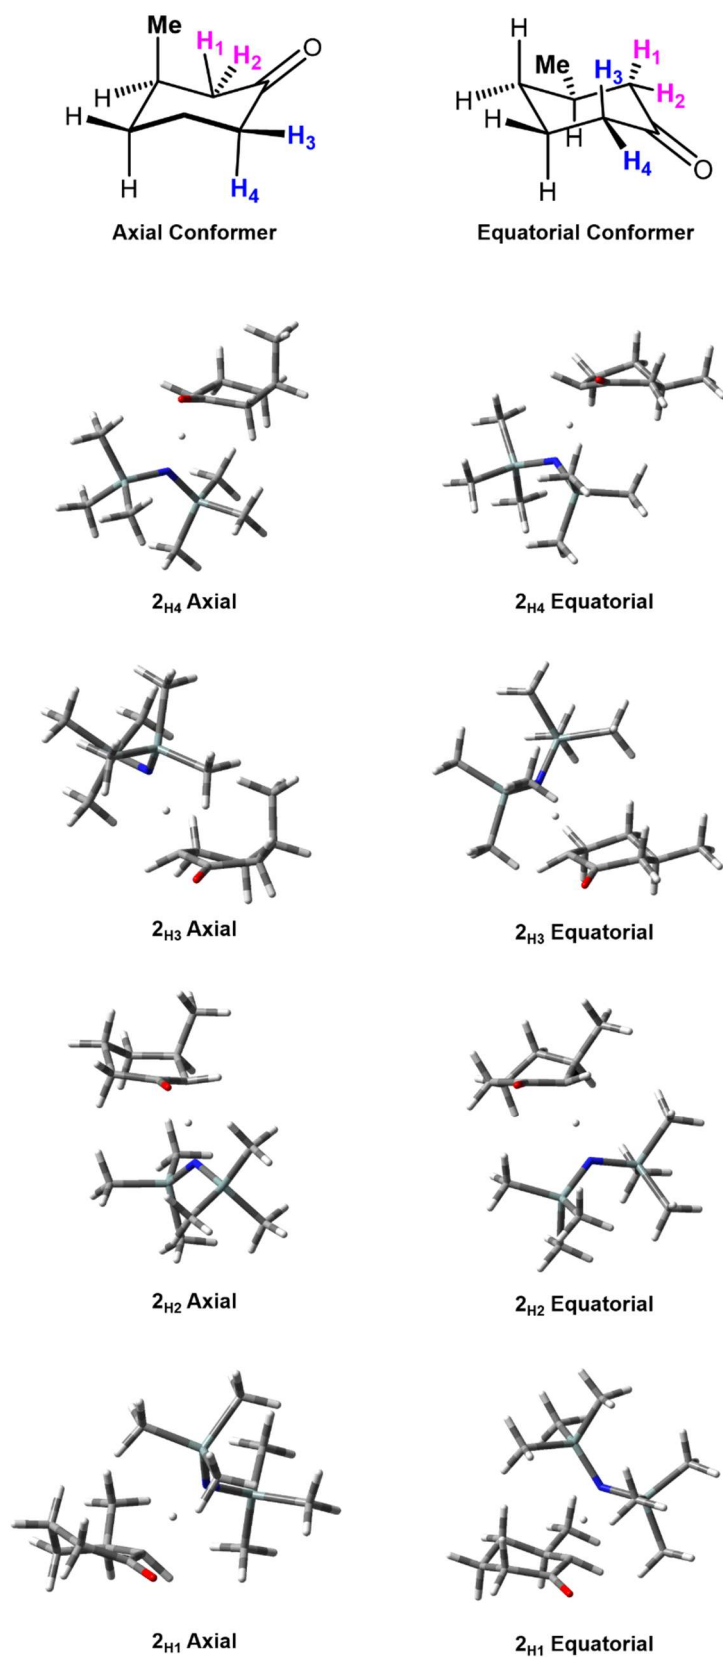

**Figure S5.** TS Conformational search for **2** with the Me group in axial (left) and equatorial position (right).

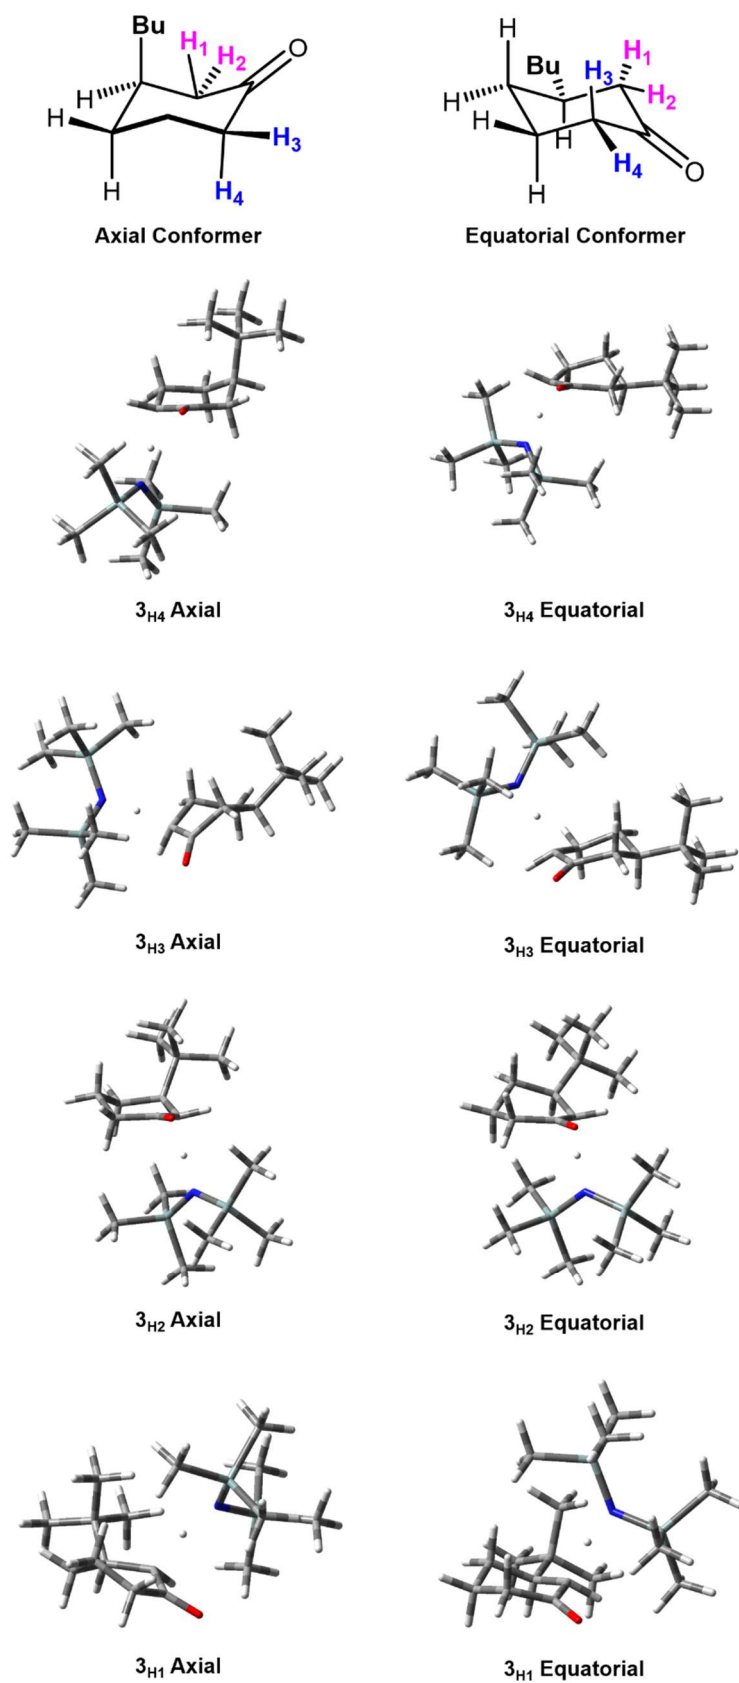

**Figure S6.** TS conformational search for **3** with the *t*Bu group in axial (left) and equatorial position (right).

### 3.6 Conformational Study on Enolates from 4

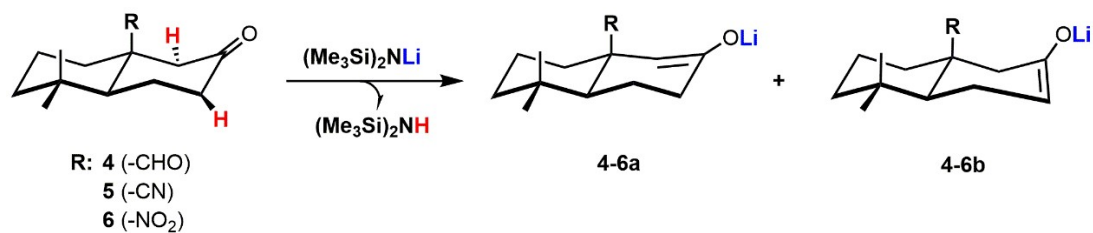

**Figure S7.** Thermodynamic (4-6a) and kinetic enolate (4-6b) from the deprotonation of 4-6 using LHMDS.

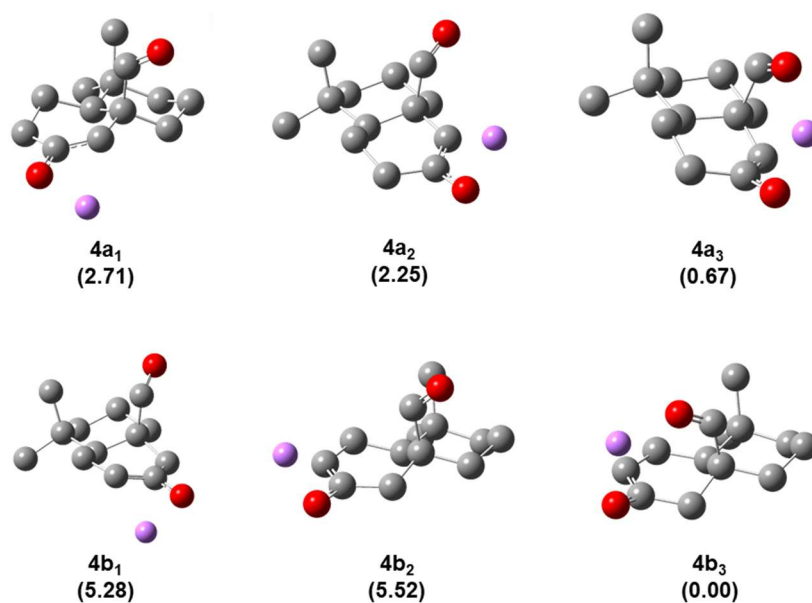

**Figure S8.** Enolate conformes from deprotonation of 4 are reported.

Relative stability is reported in kcal/mol in parentheses. Hydrogens have been hidden for better clarity. Li<sup>+</sup> cation appears: i) under the enolate plane (Conformers 4X<sub>1</sub>), ii) above the enolate plane (Conformers 4X<sub>2</sub>) or iii) double coordinated (Conformers 4X<sub>3</sub>).

| Conformer       | Relative Stability (kcal/mol) | Relative Stability (kcal/mol) |
|-----------------|-------------------------------|-------------------------------|
| 4a <sub>1</sub> | 1.58                          | 2.25                          |
| 4a <sub>2</sub> | 2.04                          | 2.71                          |
| 4a <sub>3</sub> | 0.00                          | 0.67                          |
| 4b <sub>1</sub> | 5.52                          | 5.52                          |
| 4b <sub>2</sub> | 5.28                          | 5.28                          |
| 4b <sub>3</sub> | 0.00                          | 0.00                          |

**Table S3.** Relative stabilities, expressed in kcal/mol, for enolates 4a and 4b.

### 3.7 Transition State (TS) Study with $(\text{Me}_3\text{Si})_2\text{N}^-$ (No Counter Cation)

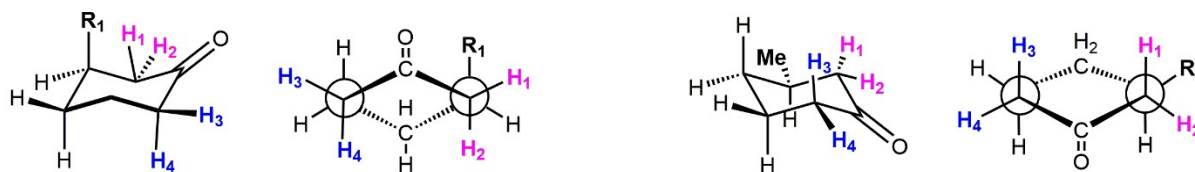

**Figure S9.** Hydrogens from thermodynamic ( $\text{H}_1$  and  $\text{H}_2$  – marked in purple) and kinetic position ( $\text{H}_3$  and  $\text{H}_4$  – marked in blue) with the  $\text{R}_1$  group in the axial (left) and equatorial position (right) in a general  $\beta$ -substituted cyclohexanone .

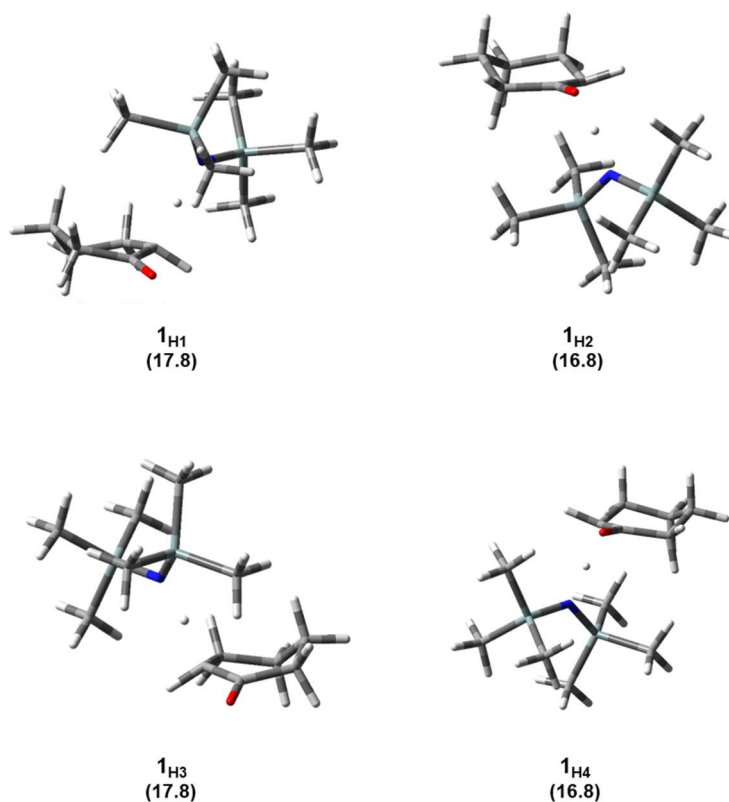

**Figure S10.** TS for the deprotonation of  $\text{H}_{1-4}$  on **1**. Activation energy in kcal/mol is shown in parentheses.

| Structure              | Ea (kcal/mol) | Averaged Ea (kcal/mol) |
|------------------------|---------------|------------------------|
| <b>1</b> <sub>H1</sub> | 17.8          | 17.3 <sup>a</sup>      |
| <b>1</b> <sub>H2</sub> | 16.8          |                        |
| <b>1</b> <sub>H3</sub> | 17.8          | 17.3 <sup>a</sup>      |
| <b>1</b> <sub>H4</sub> | 16.8          |                        |

**Table S4.** Activation Energies for each enolate formation on **1**.

<sup>a</sup>Boltzmann distribution equal to 50%.

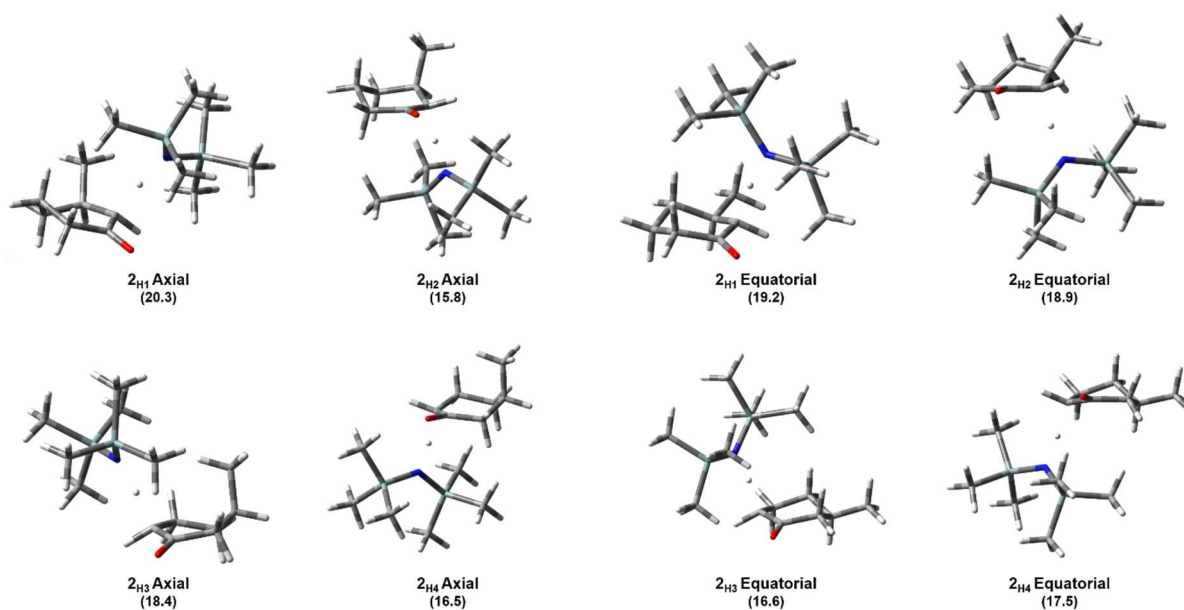

**Figure S11.** TS structures for the deprotonation of H<sub>1-4</sub> on **2**.  
Activation energy in kcal/mol is shown in parentheses.

| Structure              | Ea_Axial (kcal/mol) | Ea_Equatorial (kcal/mol) | Averaged Ea for each H <sup>a</sup> (kcal/mol) | $\Delta E_{Ea}$ (kcal/mol) | Boltzmann Distribution (%) | Averaged Ea <sup>b</sup> (kcal/mol) |
|------------------------|---------------------|--------------------------|------------------------------------------------|----------------------------|----------------------------|-------------------------------------|
| <b>2</b> <sub>H1</sub> | 20.3                | 19.2                     | 19.3                                           | 0.5                        | 30.0                       | 18.9                                |
| <b>2</b> <sub>H2</sub> | 15.8                | 18.9                     | 18.7                                           |                            |                            |                                     |
| <b>2</b> <sub>H3</sub> | 18.4                | 16.6                     | 16.7                                           | 0.8                        | 79.5                       | 16.8                                |
| <b>2</b> <sub>H4</sub> | 16.5                | 17.5                     | 17.5                                           |                            | 20.5                       |                                     |

**Table S5.** Activation Energies for each enolate formation on **2**.

<sup>a</sup>Averaged considering relative stability ( $\Delta E = 1.7$  kcal/mol) of ketone **2** at the ground state (95.0% equatorial and 5.0% axial). <sup>b</sup>Averaged Ea for each position (thermodynamic vs kinetic)

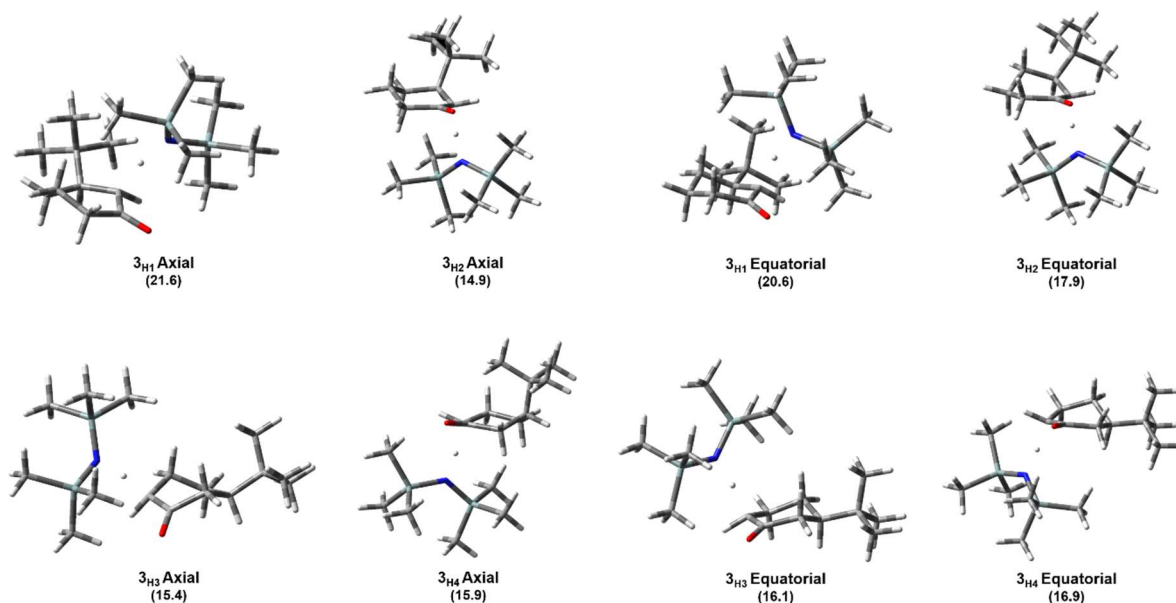

**Figure S12.** TS for the deprotonation of H<sub>1-4</sub> on **3**. Activation energy in kcal/mol is shown in parentheses.

| Structure              | Ea_Axial (kcal/mol) | Ea_Equatorial (kcal/mol) | Averaged Ea for each H <sup>a</sup> (kcal/mol) | $\Delta E_{Ea}$ (kcal/mol) | Boltzmann Distribution (%) | Averaged Ea <sup>b</sup> (kcal/mol) |
|------------------------|---------------------|--------------------------|------------------------------------------------|----------------------------|----------------------------|-------------------------------------|
| <b>3</b> <sub>H1</sub> | 21.6                | 20.6                     | 20.8                                           | 2.9                        | 0.7                        | 17.9                                |
| <b>3</b> <sub>H2</sub> | 14.9                | 17.9                     | 17.9                                           |                            | 99.3                       |                                     |
| <b>3</b> <sub>H3</sub> | 15.4                | 16.1                     | 16.1                                           | 0.8                        | 79.5                       | 16.3                                |
| <b>3</b> <sub>H4</sub> | 15.9                | 16.9                     | 16.9                                           |                            | 20.5                       |                                     |

**Table S6.** Activation Energies for each enolate formation on **3**.

<sup>a</sup>Averaged considering relative stability ( $\Delta E = 4.1$  kcal/mol) of ketone **3** at the ground state (99.9% equatorial and 0.1% axial). <sup>b</sup>Averaged Ea for each position (thermodynamic vs kinetic)



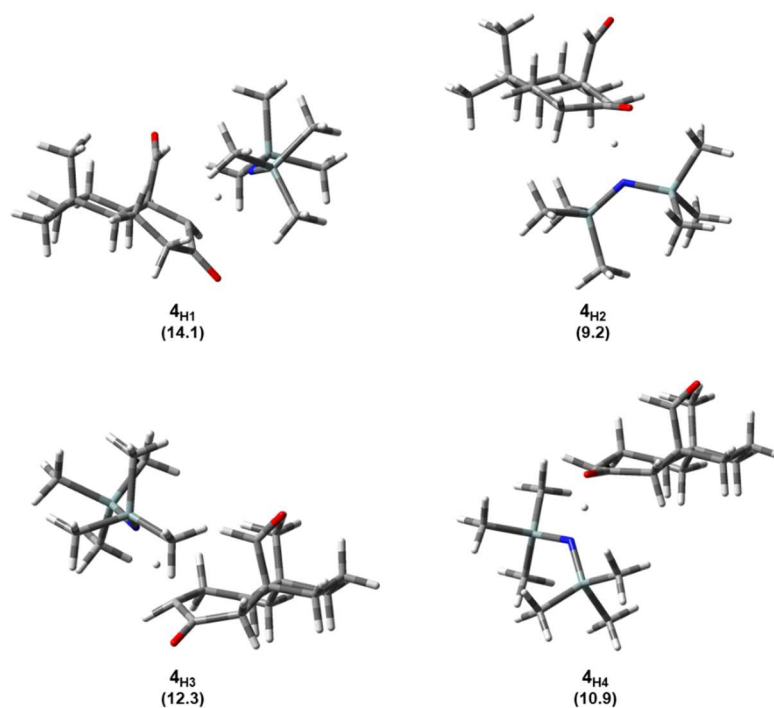

**Figure S13.** TS for the deprotonation of H<sub>1-4</sub> on **4**. Activation energy in kcal/mol is shown in parentheses.

| Structure              | E <sub>a</sub> (kcal/mol) | ΔE <sub>Ea</sub> (kcal/mol) | Boltzmann Distribution (%) | Averaged E <sub>a</sub> (kcal/mol) |
|------------------------|---------------------------|-----------------------------|----------------------------|------------------------------------|
| <b>4</b> <sub>H1</sub> | 14.1                      |                             | 0.0                        |                                    |
| <b>4</b> <sub>H2</sub> | 9.2                       | 4.9                         | 100.0                      | 9.2                                |
| <b>4</b> <sub>H3</sub> | 12.3                      |                             | 8.5                        |                                    |
| <b>4</b> <sub>H4</sub> | 10.9                      | 1.4                         | 91.5                       | 11.0                               |

**Table S7.** Activation Energies for each enolate formation on **4**.

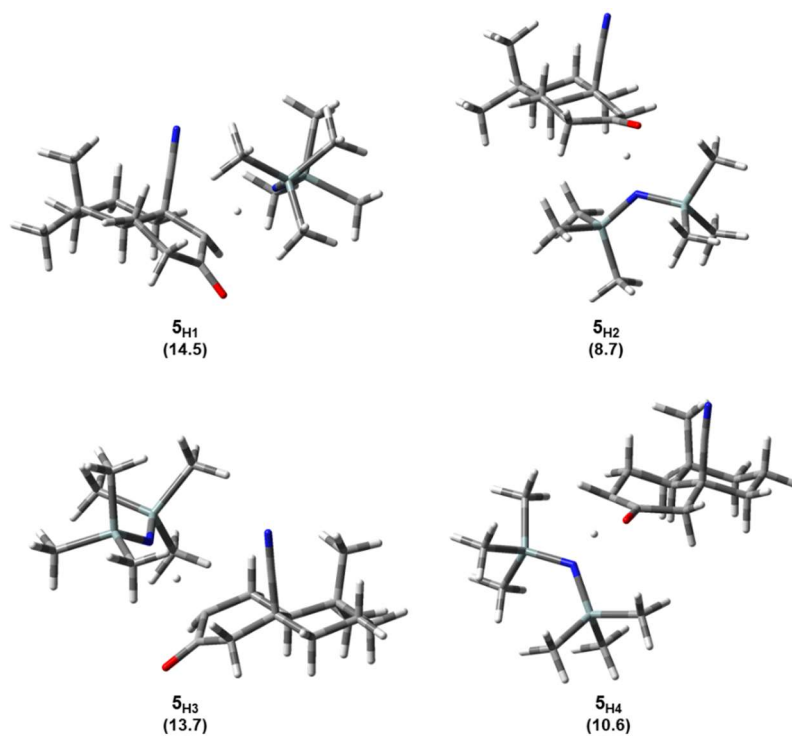

**Figure S14.** TS for the deprotonation of H<sub>1-4</sub> on **5**. Activation energy in kcal/mol is shown in parentheses.

| Structure       | E <sub>a</sub> (kcal/mol) | ΔE <sub>Ea</sub> (kcal/mol) | Boltzmann Distribution (%) | Averaged E <sub>a</sub> (kcal/mol) |
|-----------------|---------------------------|-----------------------------|----------------------------|------------------------------------|
| 5 <sub>H1</sub> | 14.5                      | 5.8                         | 0.0                        | 8.7                                |
| 5 <sub>H2</sub> | 8.7                       |                             | 100.0                      |                                    |
| 5 <sub>H3</sub> | 13.7                      | 3.1                         | 0.5                        | 10.6                               |
| 5 <sub>H4</sub> | 10.6                      |                             | 99.5                       |                                    |

**Table S8.** Activation Energies for each enolate formation on **5**.

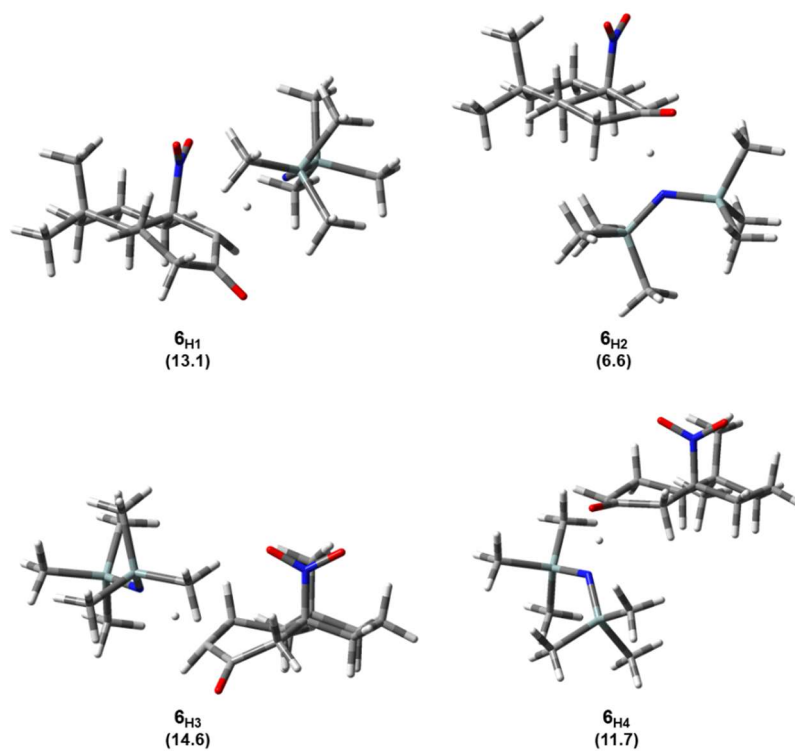

**Figure S15.** TS for the deprotonation of H<sub>1-4</sub> on **6**. Activation energy in kcal/mol is shown in parentheses.

| Structure             | E <sub>a</sub> (kcal/mol) | ΔE <sub>Ea</sub> (kcal/mol) | Boltzmann Distribution (%) | Averaged E <sub>a</sub> (kcal/mol) |
|-----------------------|---------------------------|-----------------------------|----------------------------|------------------------------------|
| <b>6<sub>H1</sub></b> | 13.1                      |                             | 0.0                        |                                    |
| <b>6<sub>H2</sub></b> | 6.6                       | 6.5                         | 100.0                      | 6.6                                |
| <b>6<sub>H3</sub></b> | 14.6                      |                             | 0.7                        |                                    |
| <b>6<sub>H4</sub></b> | 11.7                      | 2.9                         | 99.3                       | 11.7                               |

**Table S9.** Activation Energies for each enolate formation on **6**.

### 3.8 Transition State (TS) Study with LHMDS

Unsubstituted cyclohexanone (**1**) has been used as reference to confirm the same behaviour previously described and reported (see Figure S8 and Table S3). For practical reasons, the most stable TS structure for each set of hydrogens, from kinetic and thermodynamic positions, has been exclusively reported and shown for **4**, **5** and **6**.

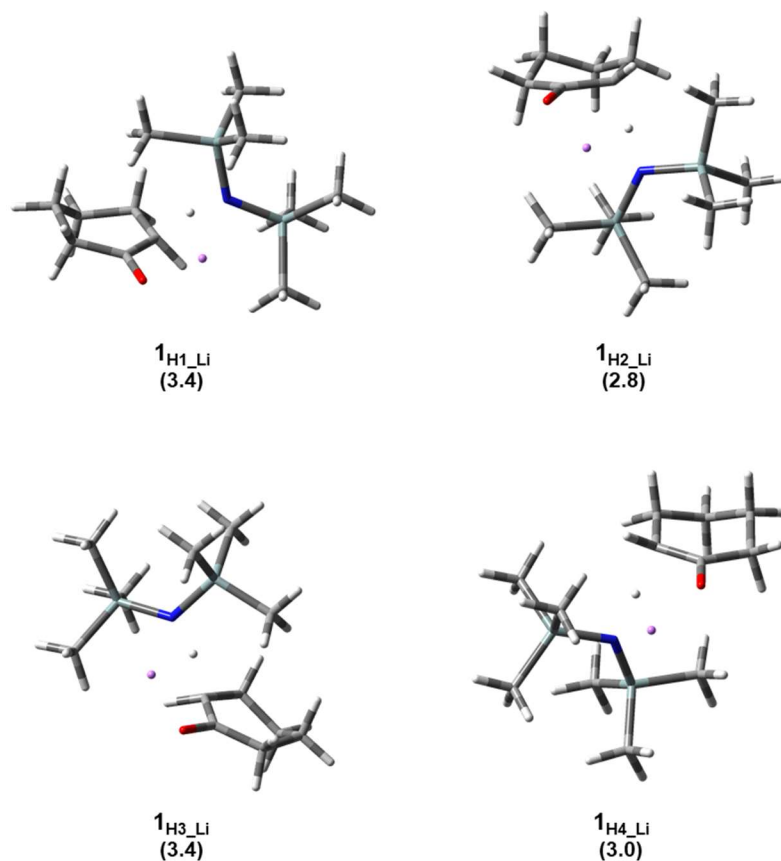

**Figure S16.** TS for the deprotonation of H<sub>1-4</sub> on **1** using LHMDS. Activation energy in kcal/mol is shown in parentheses.

| Structure           | Ea (kcal/mol) | Averaged Ea (kcal/mol) |
|---------------------|---------------|------------------------|
| $1_{\text{H1\_Li}}$ | 3.4           | 3.1 <sup>a</sup>       |
| $1_{\text{H2\_Li}}$ | 2.8           |                        |
| $1_{\text{H3\_Li}}$ | 3.4           | 3.2 <sup>a</sup>       |
| $1_{\text{H4\_Li}}$ | 3.0           |                        |

**Table S10.** Activation Energies for each enolate formation on **1** using LHMDS as a base.  
<sup>a</sup>Boltzmann distribution equal to 50%.

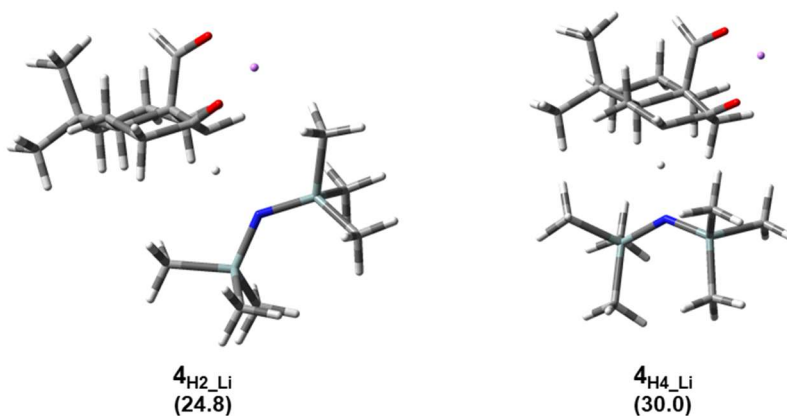

**Figure S17.** Most stable TS structures for the deprotonation of **4** using LHMDS. Activation energy in kcal/mol is shown in parentheses.

| Structure    | Ea (kcal/mol) | $\Delta E$ (kcal/mol) |
|--------------|---------------|-----------------------|
| $4_{H2\_Li}$ | 24.8          | 5.2                   |
| $4_{H4\_Li}$ | 30.0          |                       |

**Table S11.** Activation Energies for each enolate formation on **4** using LHMDS as a base.

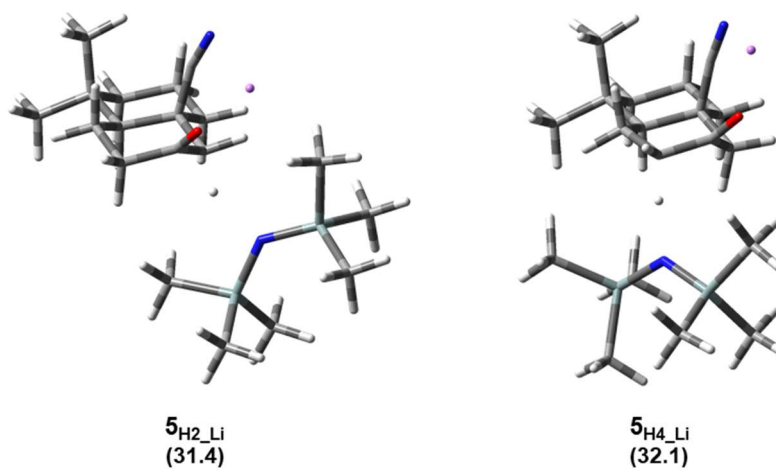

**Figure S18.** Most stable TS structures for the deprotonation of **5** using LHMDS. Activation energy in kcal/mol is shown in parentheses.

| Structure    | Ea (kcal/mol) | $\Delta E$ (kcal/mol) |
|--------------|---------------|-----------------------|
| $5_{H2\_Li}$ | 31.4          | 0.7                   |
| $5_{H4\_Li}$ | 32.1          |                       |

**Table S12.** Activation Energies for each enolate formation on **5** using LHMDS as a base.

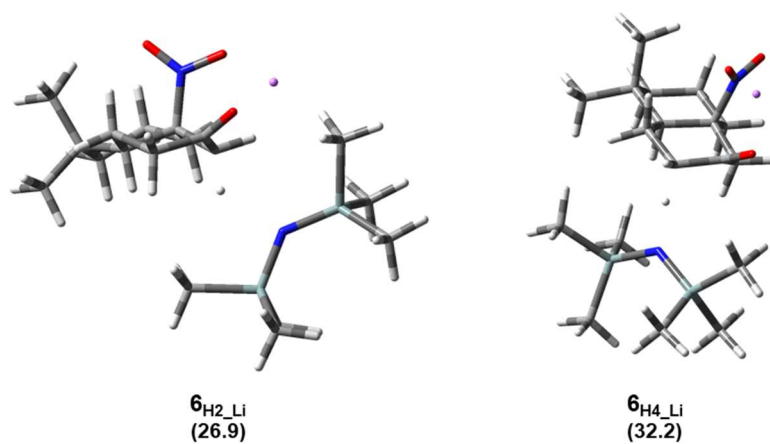

**Figure S19.** Most stable TS structures for the deprotonation of **6** using **LHMDS**.

Activation energy in kcal/mol is shown in parentheses.

\* Only TS pre-complex could be found for  $6_{H2\_Li}$  after several attempts, leading to suppose an  $E_a$  slightly lower than 26.9 kcal/mol.

| Structure    | $E_a$ (kcal/mol) | $\Delta E$ (kcal/mol) |
|--------------|------------------|-----------------------|
| $6_{H2\_Li}$ | 26.9             | 5.3                   |
| $6_{H4\_Li}$ | 32.2             |                       |

**Table S13.** Activation Energies for each enolate formation on **6** using **LHMDS** as a base.

### 3.9 Transition State (TS) Study with KHMDS

For practical reasons, the most stable TS structure for each set of hydrogens, from kinetic and thermodynamic position, has been exclusively reported and shown for **4**, **5** and **6**.

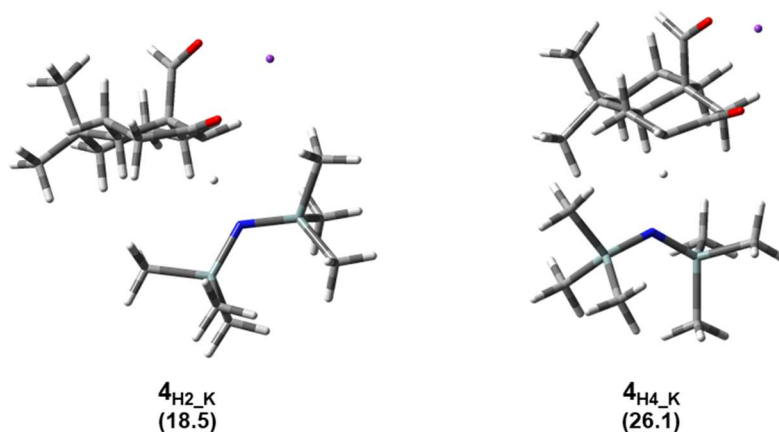

**Figure S20.** Most stable TS structures for the deprotonation of **4** using KHMDS. Activation energy in kcal/mol is shown in parentheses.

| Structure               | E <sub>a</sub> (kcal/mol) | ΔE (kcal/mol) |
|-------------------------|---------------------------|---------------|
| <b>4<sub>H2_K</sub></b> | 18.5                      | 7.6           |
| <b>4<sub>H4_K</sub></b> | 26.1                      |               |

**Table S14.** Activation Energies for each enolate formation on **4** using KHMDS as a base.

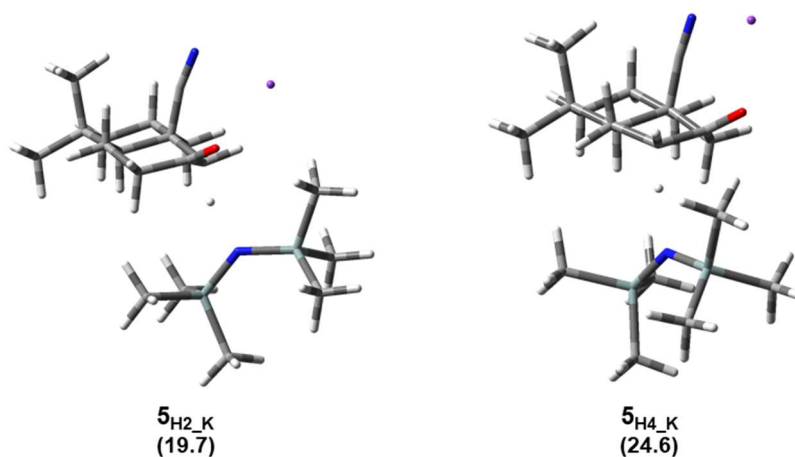

**Figure S21.** Most stable TS structures for the deprotonation of **5** using KHMDS. Activation energy in kcal/mol is shown in parentheses.

| Structure         | Ea (kcal/mol) | $\Delta E$ (kcal/mol) |
|-------------------|---------------|-----------------------|
| 5 <sub>H2_K</sub> | 19.7          | 4.9                   |
| 5 <sub>H4_k</sub> | 24.6          |                       |

**Table S15.** Activation Energies for each enolate formation on **5** using **KHMDS** as a base.

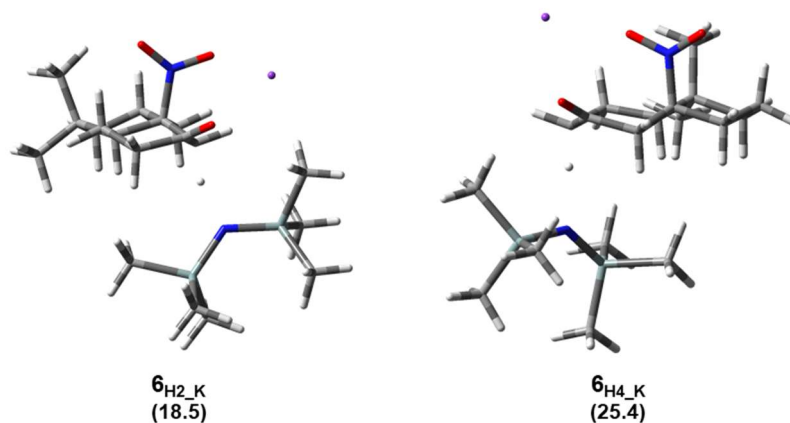

**Figure S22.** Most stable TS structures for the deprotonation of **6** using **KHMDS**. Activation energy in kcal/mol is shown in parentheses.

| Structure         | Ea (kcal/mol) | $\Delta E$ (kcal/mol) |
|-------------------|---------------|-----------------------|
| 6 <sub>H2_K</sub> | 18.5          | 6.9                   |
| 6 <sub>H4_k</sub> | 25.4          |                       |

**Table S16.** Activation Energies for each enolate formation on **6** using **KHMDS** as a base.



### 3.10 Comparison Li-TS *vs* K-TS

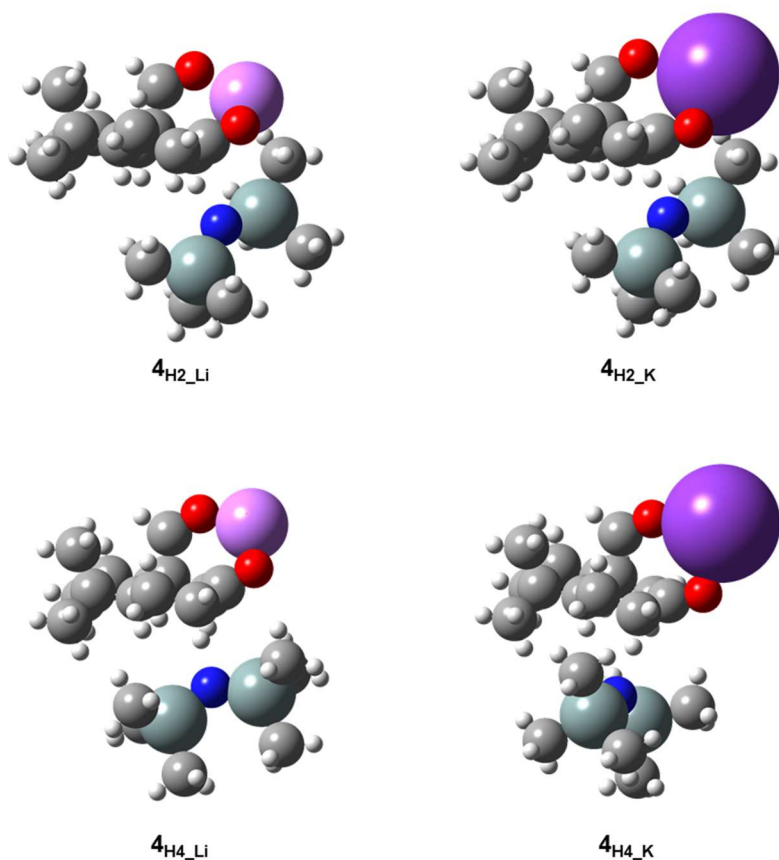

**Figure S23.** Most stable TS structures for the deprotonation of **4** using **LHMDS** (left) and **KHMDS** (right). In order to highlight structural differences, van der Waals radii have been considered for each atom.

| TS Structure              | Angle (°)                          |                           | Distance (Å)                                   |
|---------------------------|------------------------------------|---------------------------|------------------------------------------------|
|                           | Mol. Plane – Subst. R <sub>1</sub> | Mol. Plane - Ketone (C=O) | Subst. R <sub>1</sub> (Donor) - Ketone (Donor) |
| <b>4</b> <sub>H2_Li</sub> | 109.467                            | 153.091                   | 3.108                                          |
| <b>4</b> <sub>H4_Li</sub> | 107.428                            | 150.184                   | 3.038                                          |
| <b>4</b> <sub>H2_K</sub>  | 107.834                            | 165.599                   | 3.552                                          |
| <b>4</b> <sub>H4_K</sub>  | 109.149                            | 159.266                   | 3.320                                          |

**Table S17.** Structural differences in the most stable TS in **4**. Particular interest has been done to the parameters (angles and distances) where substituent R<sub>1</sub> (aldehyde group in this specific case) and carbonyl group of the ketone are involved, affecting the coordination of Li<sup>+</sup> and K<sup>+</sup>.

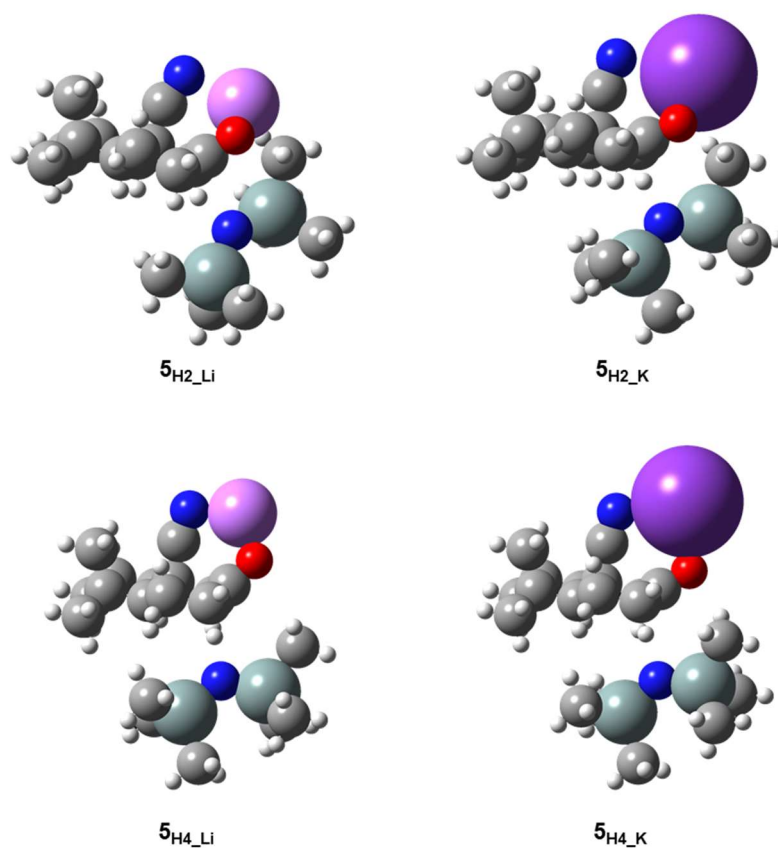

**Figure S24.** Most stable TS structures for the deprotonation of **5** using **LHMDS** (left) and **KHMDS** (right). In order to highlight structural differences, van der Waals radii have been considered for each atom.

| TS Structure              | Angle (°)                             |                              |                                  | Distance (Å)<br>Subst. R <sub>1</sub> (Donor)<br>– Ketone (Donor) |
|---------------------------|---------------------------------------|------------------------------|----------------------------------|-------------------------------------------------------------------|
|                           | Mol. Plane<br>– Subst. R <sub>1</sub> | Mol. Plane<br>– Ketone (C=O) | Cyano Group Linearity<br>(C-C≡N) |                                                                   |
| <b>5</b> <sub>H2_Li</sub> | 110.966                               | 142.862                      | 162.218                          | 3.264                                                             |
| <b>5</b> <sub>H4_Li</sub> | 110.197                               | 138.470                      | 168.465                          | 3.157                                                             |
| <b>5</b> <sub>H2_K</sub>  | 109.547                               | 155.645                      | 167.728                          | 3.824                                                             |
| <b>5</b> <sub>H4_K</sub>  | 109.596                               | 147.241                      | 172.007                          | 3.527                                                             |

**Table S18.** Structural differences in the most stable TS in **5**. Particular interest has been done to the parameters (angles and distances) where substituent R<sub>1</sub> (cyano group in this specific case) and carbonyl group of the ketone are involved, affecting the coordination of Li<sup>+</sup> and K<sup>+</sup>.

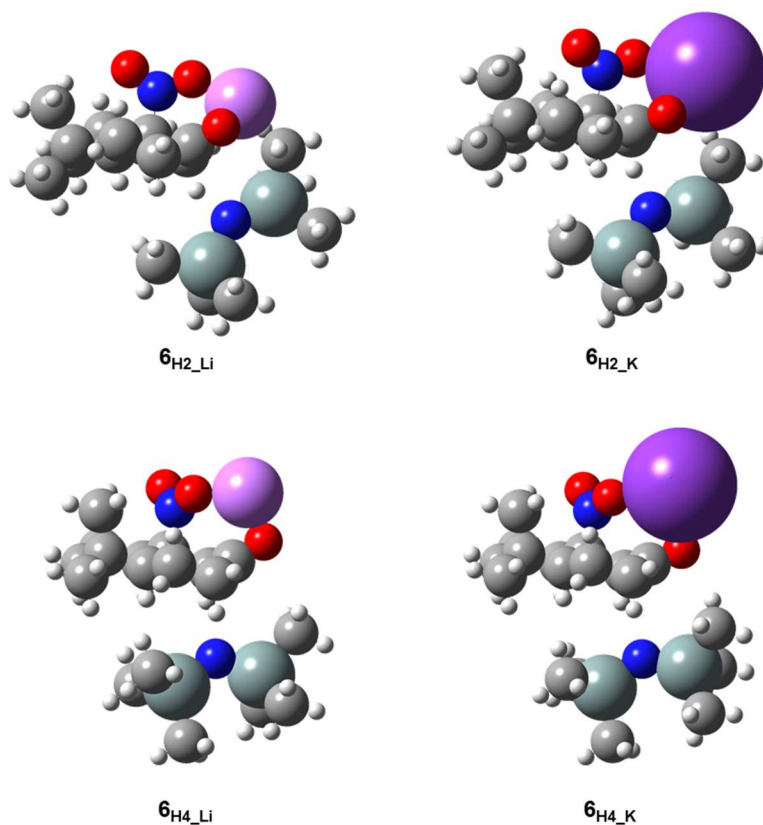

**Figure S25.** Most stable TS structures for the deprotonation of **6** using **LHMDS** (left) and **KHMDS** (right). In order to highlight structural differences, van der Waals radii have been considered for each atom.

| TS Structure              | Angle (°)                          |                           | Distance (Å)                                   |
|---------------------------|------------------------------------|---------------------------|------------------------------------------------|
|                           | Mol. Plane – Subst. R <sub>1</sub> | Mol. Plane - Ketone (C=O) | Subst. R <sub>1</sub> (Donor) - Ketone (Donor) |
| <b>6</b> <sub>H2_Li</sub> | 112.589                            | 149.508                   | 3.003                                          |
| <b>6</b> <sub>H4_Li</sub> | 107.178                            | 145.779                   | 2.924                                          |
| <b>6</b> <sub>H2_K</sub>  | 110.780                            | 156.537                   | 3.697                                          |
| <b>6</b> <sub>H4_K</sub>  | 107.823                            | 152.680                   | 3.101                                          |

**Table S19.** Structural differences in the most stable TS in **6**. Particular interest has been done to the parameters (angles and distances) where substituent R<sub>1</sub> (nitro group in this specific case) and carbonyl group of the ketone are involved, affecting the coordination of Li<sup>+</sup> and K<sup>+</sup>.

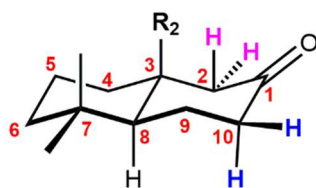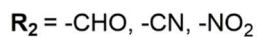

| TS Structure              | Distance (Å)                   |                                         |
|---------------------------|--------------------------------|-----------------------------------------|
|                           | Ketone (C=O) $\cdots$ $M^{1+}$ | Substituent ( $R_2$ ) $\cdots$ $M^{1+}$ |
| <b>4</b> <sub>H2_Li</sub> | 1.88041                        | 1.99525                                 |
| <b>4</b> <sub>H4_Li</sub> | 1.79461                        | 1.87819                                 |
| <b>5</b> <sub>H2_Li</sub> | 1.88840                        | 2.25675                                 |
| <b>5</b> <sub>H4_Li</sub> | 1.78997                        | 2.03557                                 |
| <b>6</b> <sub>H2_Li</sub> | 1.91197                        | 1.99048                                 |
| <b>6</b> <sub>H4_Li</sub> | 1.79046                        | 1.89527                                 |
| <b>4</b> <sub>H2_K</sub>  | 2.53397                        | 2.71027                                 |
| <b>4</b> <sub>H4_K</sub>  | 2.47400                        | 2.60532                                 |
| <b>5</b> <sub>H2_K</sub>  | 2.58186                        | 2.92177                                 |
| <b>5</b> <sub>H4_K</sub>  | 2.48808                        | 2.77399                                 |
| <b>6</b> <sub>H2_K</sub>  | 2.60430                        | 2.74074                                 |
| <b>6</b> <sub>H4_K</sub>  | 2.49683                        | 2.64351                                 |

**Table S20.** General structure and Newman projections for bicyclic ketone **4-6** (top). Distances (Å) between donors from ligands (ketone's carbonyl and substituent  $R_1$ ) with cation from the base ( $\text{Li}^{1+}$  or  $\text{K}^{1+}$ ) in the TS structures of **4**, **5** and **6** (Bottom). Hydrogens from "thermodynamic" and "kinetic position" are marked in pink and blue, respectively.

## 3.11 Cartesian Coordinates for Optimized Systems

### Cartesian coordinates for optimized ketone 1

|   |             |             |             |
|---|-------------|-------------|-------------|
| C | -1.79198300 | 0.00001800  | 0.10950600  |
| C | -1.01781000 | 1.26646200  | -0.28217400 |
| C | 0.39270400  | 1.28681900  | 0.34307900  |
| C | 0.39266200  | -1.28687700 | 0.34297200  |
| C | -1.01789700 | -1.26642900 | -0.28205800 |
| H | 0.99070900  | 2.13014600  | -0.01191500 |
| H | -0.92580300 | 1.31026300  | -1.37555600 |
| H | -1.56746700 | 2.16488400  | 0.01994700  |
| H | -1.96927100 | 0.00016900  | 1.19446700  |
| H | 0.99061500  | -2.13015300 | -0.01224200 |
| H | 0.29733400  | -1.38242700 | 1.43504400  |
| H | 0.29702100  | 1.38223500  | 1.43512600  |
| C | 1.16028800  | -0.00000500 | 0.06519700  |
| O | 2.30641100  | 0.00000100  | -0.34261600 |
| H | -1.56756600 | -2.16481200 | 0.02012500  |
| H | -2.77867600 | 0.00005900  | -0.36776500 |
| H | -0.92597300 | -1.31030200 | -1.37542900 |

### Cartesian coordinates for optimized ketone 2

|   |             |             |             |
|---|-------------|-------------|-------------|
| C | -1.30725000 | 1.01872600  | 0.42454200  |
| C | -0.21714500 | 1.64968200  | -0.45466500 |
| C | 1.19320200  | 1.19450400  | -0.02466200 |
| C | 0.17893800  | -0.97190100 | 0.91373900  |
| C | -1.23192400 | -0.52274500 | 0.45633200  |
| H | 1.96811100  | 1.53870800  | -0.71446400 |
| H | -0.37870900 | 1.37753700  | -1.50451800 |
| H | -0.28044500 | 2.74256700  | -0.40901500 |
| H | -1.20415000 | 1.40009100  | 1.45004400  |
| H | 0.29880200  | -2.05757000 | 0.85972700  |
| H | 0.32550600  | -0.66993000 | 1.96109100  |
| H | 1.41610400  | 1.61634100  | 0.96683000  |
| C | 1.28786800  | -0.32109700 | 0.09612200  |
| O | 2.18582800  | -0.96262800 | -0.41635800 |
| H | -1.95136300 | -0.87841600 | 1.20537100  |
| H | -2.29804300 | 1.33297800  | 0.07490800  |
| C | -1.61165600 | -1.16358600 | -0.88788900 |
| H | -1.62427700 | -2.25533100 | -0.80693700 |
| H | -2.60699400 | -0.83920500 | -1.21003300 |
| H | -0.90335200 | -0.90824300 | -1.68325900 |

### Cartesian coordinates for optimized ketone 2 (Flipped)

|   |             |             |             |
|---|-------------|-------------|-------------|
| C | -0.96449200 | 1.25012300  | -0.08309000 |
| C | -1.18746000 | -0.21598800 | 0.32597800  |
| C | -0.11233000 | -1.12233100 | -0.31818600 |
| C | 1.53481500  | 0.85204100  | -0.36411500 |
| C | 0.44613100  | 1.73822500  | 0.27385800  |
| H | -0.18373400 | -2.15400900 | 0.03785700  |
| H | -1.06073200 | -0.27874800 | 1.41737600  |
| H | -1.12622300 | 1.34971600  | -1.16688400 |
| H | 1.50308900  | 0.97775100  | -1.45674000 |
| H | -0.27346700 | -1.13443500 | -1.40759100 |
| C | 1.30493400  | -0.62394400 | -0.06781100 |
| O | 2.18957200  | -1.35439200 | 0.33735100  |
| H | 0.58455400  | 2.77787600  | -0.04289800 |
| H | -1.71433600 | 1.88665400  | 0.40206700  |
| C | -2.59905000 | -0.70361300 | -0.01635500 |
| H | -2.74949500 | -1.74123100 | 0.29955900  |
| H | -3.35994500 | -0.08906800 | 0.47656600  |

|   |             |             |             |
|---|-------------|-------------|-------------|
| H | -2.77895500 | -0.65495200 | -1.09707700 |
| H | 0.56825400  | 1.72671800  | 1.36498100  |
| H | 2.53912900  | 1.12178100  | -0.02769100 |

### Cartesian coordinates for optimized ketone 3

|   |             |             |             |
|---|-------------|-------------|-------------|
| C | 0.28413500  | 1.66469000  | 0.61121900  |
| C | 1.36514800  | 1.64394300  | -0.48024800 |
| C | 2.42614500  | 0.55971600  | -0.20898300 |
| C | 0.66930500  | -0.77693500 | 1.11271400  |
| C | -0.41867800 | 0.30833100  | 0.87647000  |
| H | 3.12809500  | 0.44507100  | -1.03896200 |
| H | 0.91580700  | 1.47299700  | -1.46381100 |
| H | 1.85186300  | 2.62462500  | -0.53438500 |
| H | 0.76372500  | 1.96696200  | 1.55332700  |
| H | 0.25706200  | -1.78542400 | 1.18000100  |
| H | 1.14783600  | -0.56204600 | 2.07998200  |
| H | 3.00706400  | 0.84608400  | 0.68075000  |
| C | 1.79462900  | -0.79215000 | 0.08541500  |
| O | 2.18360600  | -1.82117100 | -0.43662200 |
| H | -0.94079800 | 0.43416600  | 1.83499300  |
| H | -0.45216600 | 2.44309100  | 0.39293800  |
| C | -1.55716300 | -0.13064800 | -0.11879700 |
| C | -2.51195100 | 1.05223600  | -0.38219300 |
| H | -2.04284900 | 1.83911700  | -0.98067000 |
| H | -3.39400200 | 0.70902000  | -0.93339400 |
| H | -2.86244000 | 1.50268900  | 0.55389000  |
| C | -1.04433200 | -0.66716900 | -1.47192800 |
| H | -0.51398800 | 0.09616100  | -2.04820000 |
| H | -0.37664300 | -1.52464600 | -1.35193000 |
| H | -1.89189900 | -0.99702000 | -2.08331600 |
| C | -2.38323100 | -1.25046000 | 0.55625700  |
| H | -2.80781500 | -0.91243300 | 1.50853400  |
| H | -3.21488700 | -1.55212900 | -0.08951400 |
| H | -1.78687300 | -2.14624700 | 0.75318900  |

### Cartesian coordinates for optimized ketone 3 (Flipped)

|   |             |             |             |
|---|-------------|-------------|-------------|
| C | -0.24712300 | 1.49672400  | 0.09541300  |
| C | 0.27891700  | 0.09835200  | -0.29236000 |
| C | -0.62537800 | -0.98104500 | 0.35908900  |
| C | -2.63396800 | 0.62787500  | 0.30694700  |
| C | -1.71322500 | 1.69234100  | -0.31844800 |
| H | -0.36819900 | -1.99123700 | 0.03675600  |
| H | 0.15116000  | 0.00108000  | -1.38221400 |
| H | -0.15935400 | 1.63891000  | 1.18125000  |
| H | -2.66608700 | 0.77737600  | 1.39650800  |
| H | -0.51100300 | -0.93795100 | 1.45216000  |
| C | -2.10315800 | -0.77367600 | 0.05111500  |
| O | -2.80672100 | -1.67309700 | -0.36962600 |
| H | -2.05711500 | 2.69254500  | -0.03216500 |
| H | 0.35986700  | 2.27773300  | -0.37187800 |
| C | 1.81007900  | -0.12266500 | -0.02947800 |
| H | -1.79189500 | 1.63756700  | -1.41228400 |
| H | -3.65857200 | 0.68915000  | -0.06861300 |
| C | 2.17475800  | 0.01986600  | 1.46202400  |
| H | 1.64419200  | -0.70664700 | 2.08614600  |
| H | 3.24697900  | -0.15307100 | 1.60540000  |
| H | 1.95257700  | 1.02090300  | 1.84498300  |
| C | 2.22509900  | -1.52968100 | -0.51163700 |
| H | 1.93180200  | -1.69589300 | -1.55465700 |
| H | 3.31249500  | -1.64557600 | -0.45052900 |
| H | 1.78044000  | -2.32498900 | 0.09316000  |
| C | 2.62610300  | 0.90675500  | -0.84163900 |
| H | 3.69724900  | 0.69543800  | -0.75428200 |
| H | 2.36692300  | 0.86883000  | -1.90605700 |
| H | 2.46967600  | 1.93153200  | -0.49283400 |

#### Cartesian coordinates for optimized ketone 4

|   |             |             |             |
|---|-------------|-------------|-------------|
| C | 0.22973800  | 0.71349900  | -0.32220100 |
| C | -0.68394700 | 1.72675100  | 0.40119300  |
| C | -2.11457400 | 1.74196500  | -0.17353200 |
| C | -1.80524100 | -0.69940800 | -0.89339000 |
| C | -0.36236000 | -0.74029300 | -0.28972900 |
| H | -2.78591000 | 2.37441100  | 0.41299900  |
| H | -0.73079600 | 1.51603400  | 1.47498100  |
| H | -0.26416300 | 2.73232400  | 0.31147900  |
| H | 0.20355700  | 0.98650200  | -1.39010700 |
| H | -2.29355200 | -1.67579200 | -0.82652300 |
| H | -1.70183900 | -0.45066900 | -1.95921200 |
| H | -2.08347400 | 2.14991900  | -1.19480700 |
| C | -2.71570700 | 0.34981300  | -0.26756600 |
| O | -3.84390500 | 0.09118300  | 0.10515800  |
| C | 1.74365600  | 0.80360600  | 0.07639000  |
| C | 0.51186100  | -1.70254000 | -1.11555100 |
| H | 0.42188700  | -1.42087300 | -2.17362900 |
| H | 0.12033000  | -2.71958700 | -1.01679900 |
| C | 1.98750700  | -1.65665100 | -0.70498000 |
| H | 2.57188500  | -2.30431900 | -1.36903000 |
| H | 2.09805800  | -2.07074600 | 0.30204000  |
| C | 2.53535200  | -0.22746400 | -0.77038700 |
| H | 3.58675000  | -0.20959700 | -0.45669500 |
| H | 2.52273600  | 0.10692800  | -1.81813000 |
| C | 1.99112800  | 0.56152100  | 1.58075600  |
| H | 3.05881700  | 0.67008200  | 1.80104600  |
| H | 1.45924300  | 1.29065300  | 2.20024000  |
| H | 1.69684600  | -0.43725900 | 1.91111700  |
| C | 2.29010500  | 2.20421400  | -0.27590500 |
| H | 3.37894100  | 2.22185700  | -0.15744900 |
| H | 2.06662900  | 2.47208300  | -1.31507500 |
| H | 1.88355000  | 2.98724000  | 0.37105000  |
| C | -0.55544500 | -1.28408500 | 1.12721700  |
| H | -1.11225800 | -0.61905200 | 1.82280800  |
| O | -0.20730400 | -2.38439600 | 1.49931900  |

#### Cartesian coordinates for optimized ketone 5

|   |             |             |             |
|---|-------------|-------------|-------------|
| C | 0.25574600  | 0.62162600  | -0.34653300 |
| C | -0.64779300 | 1.62941500  | 0.38949100  |
| C | -2.06857400 | 1.67785900  | -0.20376900 |
| C | -1.79357800 | -0.79043300 | -0.88931600 |
| C | -0.37061400 | -0.81518600 | -0.25442900 |
| H | -2.73824700 | 2.31044900  | 0.38433300  |
| H | -0.70976900 | 1.36309700  | 1.45046700  |
| H | -0.21347100 | 2.63189000  | 0.34447900  |
| H | 0.20256600  | 0.85743500  | -1.42141400 |
| H | -2.29696100 | -1.75360200 | -0.77505000 |
| H | -1.66706300 | -0.60360700 | -1.96509600 |
| H | -2.02087500 | 2.10572400  | -1.21687600 |
| C | -2.70457300 | 0.30366200  | -0.33924800 |
| O | -3.87062300 | 0.08872800  | -0.07713100 |
| C | 1.77787800  | 0.71529500  | 0.01967700  |
| C | 0.50946400  | -1.85464200 | -0.99555900 |
| H | 0.45775700  | -1.61821800 | -2.06676300 |
| H | 0.07865600  | -2.85358700 | -0.86796700 |
| C | 1.96723300  | -1.81155900 | -0.53506500 |
| H | 2.55371300  | -2.53793600 | -1.10896800 |
| H | 2.03555700  | -2.12132200 | 0.51453300  |
| C | 2.54791300  | -0.40667200 | -0.72607500 |
| H | 3.59727400  | -0.38371600 | -0.40812800 |
| H | 2.54818800  | -0.17525000 | -1.80118000 |
| C | 2.05298800  | 0.62958200  | 1.53718500  |
| H | 3.12885800  | 0.72975500  | 1.71802300  |
| H | 1.55666000  | 1.43893400  | 2.08116900  |
| H | 1.72755000  | -0.31132000 | 1.98365400  |
| C | 2.33325200  | 2.06472100  | -0.48656700 |
| H | 3.41955900  | 2.09704400  | -0.35065400 |

|   |             |             |             |
|---|-------------|-------------|-------------|
| H | 2.12859500  | 2.20856600  | -1.55369200 |
| H | 1.91537700  | 2.91706300  | 0.05698100  |
| C | -0.52765800 | -1.24833900 | 1.15020200  |
| N | -0.67557700 | -1.61474200 | 2.24274600  |

#### Cartesian coordinates for optimized ketone 6

|   |             |             |             |
|---|-------------|-------------|-------------|
| C | 0.31030300  | 0.77391300  | -0.34783800 |
| C | -0.61317300 | 1.75690600  | 0.39992300  |
| C | -2.03317100 | 1.80099900  | -0.19105800 |
| C | -1.71335400 | -0.60005900 | -1.07104400 |
| C | -0.29377000 | -0.66625600 | -0.46285600 |
| H | -2.71870000 | 2.37347700  | 0.43857600  |
| H | -0.67344600 | 1.49653800  | 1.45791500  |
| H | -0.18343900 | 2.76039200  | 0.34105000  |
| H | 0.31137700  | 1.09674300  | -1.40191400 |
| H | -2.20300300 | -1.57751500 | -1.04290500 |
| H | -1.59448500 | -0.32631400 | -2.12783900 |
| H | -2.00048800 | 2.30440100  | -1.17022200 |
| C | -2.64702700 | 0.43548500  | -0.44663200 |
| O | -3.82518000 | 0.19831400  | -0.27811200 |
| C | 1.81765600  | 0.82823700  | 0.08373200  |
| C | 0.61271100  | -1.58776200 | -1.29446400 |
| H | 0.52171900  | -1.24236500 | -2.33226300 |
| H | 0.22008700  | -2.60787700 | -1.26377100 |
| C | 2.09137200  | -1.55593400 | -0.89028800 |
| H | 2.66936500  | -2.13809000 | -1.61722400 |
| H | 2.21791800  | -2.05156900 | 0.07498000  |
| C | 2.62494900  | -0.12160200 | -0.83863300 |
| H | 3.67304500  | -0.12349400 | -0.51507300 |
| H | 2.61887200  | 0.29835100  | -1.85526900 |
| C | 2.04464900  | 0.46351600  | 1.56700800  |
| H | 3.10297500  | 0.59596700  | 1.81687700  |
| H | 1.47076900  | 1.11397900  | 2.23358900  |
| H | 1.78535100  | -0.57002500 | 1.80331900  |
| C | 2.36113200  | 2.25593100  | -0.14297500 |
| H | 3.44977200  | 2.26139700  | -0.02327200 |
| H | 2.13811200  | 2.61686000  | -1.15386300 |
| H | 1.95431500  | 2.97592200  | 0.57253600  |
| N | -0.51443400 | -1.29551900 | 0.93610100  |
| O | -1.31583700 | -0.72821300 | 1.67687100  |
| O | 0.07442500  | -2.33115000 | 1.22909200  |

#### Cartesian coordinates for optimized LHMDS (No Lithium)

|    |             |             |             |
|----|-------------|-------------|-------------|
| N  | 0.00000000  | 0.00023200  | 0.00148200  |
| Si | -1.64438700 | -0.00000700 | 0.00029400  |
| Si | 1.64438900  | 0.00002700  | 0.00030000  |
| C  | 2.44667600  | 0.81699800  | 1.54731500  |
| H  | 3.54539100  | 0.79984100  | 1.51539400  |
| H  | 2.13166500  | 1.86392200  | 1.63991800  |
| H  | 2.13123600  | 0.30352300  | 2.46420600  |
| C  | 2.44436100  | 0.93185500  | -1.48164300 |
| H  | 3.54313400  | 0.91275300  | -1.45274200 |
| H  | 2.12763100  | 0.48907500  | -2.43425700 |
| H  | 2.12900400  | 1.98268400  | -1.49434900 |
| C  | 2.44504800  | -1.74897000 | -0.06661300 |
| H  | 3.54381200  | -1.71399500 | -0.06640800 |
| H  | 2.13009900  | -2.35241100 | 0.79391500  |
| H  | 2.12837000  | -2.28586100 | -0.96956400 |
| C  | -2.44663800 | 0.83476300  | 1.53783000  |
| H  | -2.13117500 | 0.33194400  | 2.46059900  |
| H  | -2.13163600 | 1.88269200  | 1.61830300  |
| H  | -3.54535500 | 0.81725800  | 1.50614400  |
| C  | -2.44437200 | 0.91476700  | -1.49223300 |
| H  | -2.12768500 | 0.46107400  | -2.43971500 |
| H  | -3.54314500 | 0.89600000  | -1.46309600 |
| H  | -2.12898800 | 1.96537000  | -1.51700700 |



|   |             |             |             |
|---|-------------|-------------|-------------|
| C | -2.44507500 | -1.74961500 | -0.04649700 |
| H | -3.54383600 | -1.71459500 | -0.04678600 |
| H | -2.12831800 | -2.29689500 | -0.94316100 |
| H | -2.13021900 | -2.34308200 | 0.82097600  |

Cartesian coordinates for optimized **LHMDS**

|    |             |             |             |
|----|-------------|-------------|-------------|
| N  | 0.01265600  | 0.58713800  | 0.00000200  |
| Si | 1.62168500  | 0.01441600  | -0.00000100 |
| Si | -1.55998200 | -0.05018400 | 0.00000300  |
| C  | -2.70602900 | 1.52458300  | 0.00007200  |
| H  | -3.76098200 | 1.23132800  | 0.00010700  |
| H  | -2.58951400 | 2.15546900  | 0.89881100  |
| H  | -2.58957900 | 2.15549000  | -0.89866000 |
| C  | -2.06092800 | -1.05091800 | 1.53359100  |
| H  | -3.11733200 | -1.34390000 | 1.51026800  |
| H  | -1.46615600 | -1.96875200 | 1.60482400  |
| H  | -1.88704100 | -0.48192600 | 2.45362900  |
| C  | -2.06096400 | -1.05077800 | -1.53366700 |
| H  | -3.11737000 | -1.34375300 | -1.51035800 |
| H  | -1.88708400 | -0.48170000 | -2.45365400 |
| H  | -1.46620000 | -1.96860900 | -1.60499600 |
| C  | 2.78449500  | 1.52812500  | -0.00007000 |
| H  | 2.62256400  | 2.15298500  | -0.88879500 |
| H  | 2.62254900  | 2.15307500  | 0.88859000  |
| H  | 3.84231000  | 1.24059100  | -0.00004400 |
| C  | 2.05944100  | -1.02564100 | 1.53139200  |
| H  | 1.45051200  | -1.93598000 | 1.58026100  |
| H  | 3.11187000  | -1.33406500 | 1.52841100  |
| H  | 1.87868500  | -0.46403700 | 2.45504300  |
| C  | 2.05939800  | -1.02575000 | -1.53133200 |
| H  | 3.11183400  | -1.33415000 | -1.52837400 |
| H  | 1.45048800  | -1.93610900 | -1.58010300 |
| H  | 1.87858700  | -0.46422300 | -2.45501900 |
| Li | -0.49768300 | 2.32044200  | 0.00003300  |

Cartesian coordinates for optimized **KHMDS**

|    |             |             |             |
|----|-------------|-------------|-------------|
| N  | 0.00001300  | 0.09605600  | 0.00000800  |
| Si | 1.58067100  | -0.49105600 | 0.00000500  |
| Si | -1.58062500 | -0.49109900 | 0.00000100  |
| C  | -2.78795900 | 1.01821600  | -0.00007600 |
| H  | -3.83529900 | 0.69457500  | -0.00007800 |
| H  | -2.66454800 | 1.64832200  | 0.89470000  |
| H  | -2.66452100 | 1.64825200  | -0.89489800 |
| C  | -2.07983100 | -1.51496100 | 1.52830800  |
| H  | -3.13680800 | -1.80781700 | 1.50485900  |
| H  | -1.48477000 | -2.43336900 | 1.59216300  |
| H  | -1.90714200 | -0.95442500 | 2.45466200  |
| C  | -2.07978300 | -1.51508400 | -1.52823800 |
| H  | -3.13676300 | -1.80793100 | -1.50480200 |
| H  | -1.90705800 | -0.95462700 | -2.45463300 |
| H  | -1.48472700 | -2.43350200 | -1.59199600 |
| C  | 2.78798300  | 1.01826800  | 0.00001900  |
| H  | 2.66456700  | 1.64834700  | -0.89477500 |
| H  | 2.66456600  | 1.64833000  | 0.89482400  |
| H  | 3.83532200  | 0.69461900  | 0.00001600  |
| C  | 2.07984000  | -1.51497100 | 1.52828700  |
| H  | 1.48428300  | -2.43303300 | 1.59247900  |
| H  | 3.13664700  | -1.80841500 | 1.50453000  |
| H  | 1.90777600  | -0.95420500 | 2.45462000  |
| C  | 2.07984300  | -1.51494200 | -1.52829600 |
| H  | 3.13664800  | -1.80838800 | -1.50454200 |
| H  | 1.48428400  | -2.43300200 | -1.59250700 |
| H  | 1.90778200  | -0.95415800 | -2.45461900 |
| K  | -0.00008000 | 2.63258100  | -0.00000800 |

Cartesian coordinates for optimized **TS-1** with **(Me<sub>3</sub>Si)<sub>2</sub>N<sup>-</sup>** (Axial Hydrogen)

|    |             |             |             |
|----|-------------|-------------|-------------|
| C  | -3.39927000 | -1.65726400 | -0.92082900 |
| C  | -3.51752100 | -0.17545200 | -1.29086600 |
| C  | -3.50224600 | 0.67657300  | -0.01602000 |
| C  | -1.63016200 | -0.89220300 | 0.79478600  |
| C  | -2.03661900 | -1.93055700 | -0.26483100 |
| H  | -3.32588900 | 1.73694800  | -0.23552400 |
| H  | -2.67183000 | 0.09674200  | -1.93678900 |
| H  | -4.43020200 | 0.01831100  | -1.87272800 |
| H  | -4.21109000 | -1.91418100 | -0.22328700 |
| H  | -0.38814900 | -0.37440700 | 0.37063400  |
| H  | -1.26600500 | -1.32523400 | 1.73000100  |
| H  | -4.48686800 | 0.63610100  | 0.47181000  |
| C  | -2.48484300 | 0.24073200  | 1.06352300  |
| O  | -2.43371300 | 0.93767800  | 2.09377300  |
| N  | 0.85095500  | -0.01697400 | -0.00280000 |
| Si | 0.98145800  | 1.67423000  | -0.24112600 |
| Si | 2.05273900  | -1.22245300 | 0.08620000  |
| C  | 3.47871700  | -0.85716300 | 1.31258100  |
| H  | 4.18741900  | -1.69433900 | 1.37061200  |
| H  | 4.04729900  | 0.03572200  | 1.02869800  |
| H  | 3.08157400  | -0.68465300 | 2.31979300  |
| C  | 2.90730600  | -1.60019100 | -1.58572100 |
| H  | 3.63239100  | -2.42094400 | -1.50188100 |
| H  | 2.16478400  | -1.88449000 | -2.34070100 |
| H  | 3.44262100  | -0.72362300 | -1.96918600 |
| C  | 1.32381400  | -2.88377700 | 0.67072300  |
| H  | 2.11076300  | -3.64513100 | 0.74752400  |
| H  | 0.85323200  | -2.78796100 | 1.65522400  |
| H  | 0.56168700  | -3.25825200 | -0.02014800 |
| C  | 0.58383500  | 2.66344600  | 1.33389300  |
| H  | 0.53173900  | 3.74452300  | 1.14701000  |
| H  | -0.37410700 | 2.33487800  | 1.75281700  |
| H  | 1.35331400  | 2.49371900  | 2.09740200  |
| C  | 2.70960200  | 2.25675500  | -0.82776400 |
| H  | 3.00160100  | 1.77668300  | -1.76910300 |
| H  | 2.71021000  | 3.34166300  | -0.99733900 |
| H  | 3.49074300  | 2.04157900  | -0.09007500 |
| C  | -0.21849500 | 2.28165700  | -1.59560700 |
| H  | -0.15634300 | 3.36857000  | -1.73758200 |
| H  | 0.00555500  | 1.80330400  | -2.55662000 |
| H  | -1.25544400 | 2.04001900  | -1.34156100 |
| H  | -2.04645600 | -2.93938400 | 0.17148000  |
| H  | -3.53141900 | -2.29372600 | -1.80764200 |
| H  | -1.28158800 | -1.96525200 | -1.06767600 |

Cartesian coordinates for optimized **TS-1** with **(Me<sub>3</sub>Si)<sub>2</sub>N<sup>-</sup>** (Equatorial Hydrogen)

|    |             |             |             |
|----|-------------|-------------|-------------|
| C  | 3.23363600  | 1.20168700  | -0.54205500 |
| C  | 4.01498600  | 0.34309700  | 0.45894800  |
| C  | 3.07735500  | -0.62924100 | 1.18751200  |
| C  | 1.68344200  | -0.79359400 | -0.94288500 |
| C  | 2.52218900  | 0.31870100  | -1.57745300 |
| H  | 3.62943900  | -1.33864300 | 1.81365800  |
| H  | 4.78228800  | -0.22878800 | -0.08467300 |
| H  | 4.55370600  | 0.97551000  | 1.17935200  |
| H  | 2.49281000  | 1.80021700  | 0.00444300  |
| H  | 1.31877400  | -1.51486300 | -1.67911400 |
| H  | 0.40490300  | -0.27927500 | -0.54052300 |
| H  | 2.41501200  | -0.06451300 | 1.86033100  |
| C  | 2.17923700  | -1.45375100 | 0.24134200  |
| O  | 1.84549100  | -2.59331200 | 0.61884900  |
| N  | -0.84437000 | 0.09262100  | -0.28395300 |
| Si | -1.90620700 | -1.24769200 | -0.13037300 |
| Si | -1.07078500 | 1.73066900  | 0.13478100  |
| C  | -0.20312700 | 2.22103700  | 1.76764000  |
| H  | -0.30804300 | 3.29131200  | 1.99047200  |

|   |             |             |             |
|---|-------------|-------------|-------------|
| H | -0.62914400 | 1.66012000  | 2.60813300  |
| H | 0.86753900  | 1.99006600  | 1.73755500  |
| C | -2.89307400 | 2.26242600  | 0.38073700  |
| H | -2.94868100 | 3.32030700  | 0.67004700  |
| H | -3.47797100 | 2.13796100  | -0.53705400 |
| H | -3.38674700 | 1.68077000  | 1.16787000  |
| C | -0.39465000 | 2.91384500  | -1.20281400 |
| H | -0.52170100 | 3.96615700  | -0.91627600 |
| H | 0.67088100  | 2.74607000  | -1.39091800 |
| H | -0.92123800 | 2.75839100  | -2.15186200 |
| C | -2.27705200 | -1.72234600 | 1.68465400  |
| H | -1.34351100 | -1.97531000 | 2.19956300  |
| H | -2.74451400 | -0.89417700 | 2.23199800  |
| H | -2.94707200 | -2.58932000 | 1.75827200  |
| C | -3.61683400 | -0.98236500 | -0.95350700 |
| H | -3.49841200 | -0.70188700 | -2.00704600 |
| H | -4.21066700 | -1.90578400 | -0.92071000 |
| H | -4.20363900 | -0.19579000 | -0.46731400 |
| C | -1.18320500 | -2.79840000 | -0.94946900 |
| H | -1.86045800 | -3.65245300 | -0.81486900 |
| H | -1.04410700 | -2.65293900 | -2.02770000 |
| H | -0.21028700 | -3.04855900 | -0.51239400 |
| H | 1.88798500  | 0.94852500  | -2.21812900 |
| H | 3.90495500  | 1.91375400  | -1.04323200 |
| H | 3.29503300  | -0.09696500 | -2.25062300 |

Cartesian coordinates for optimized **TS-2<sub>H1</sub>** with **(Me<sub>3</sub>Si)<sub>2</sub>N<sup>+</sup>**

|    |             |             |             |
|----|-------------|-------------|-------------|
| C  | -3.76107000 | -1.13585300 | -0.59614600 |
| C  | -3.75491900 | 0.38829100  | -0.75098800 |
| C  | -3.32669200 | 1.03506700  | 0.57093400  |
| C  | -1.56906300 | -0.84954100 | 0.71471700  |
| C  | -2.33978200 | -1.68423600 | -0.33686200 |
| H  | -3.03292000 | 2.08371600  | 0.43784600  |
| H  | -3.06207800 | 0.67048700  | -1.55350900 |
| H  | -4.74486200 | 0.75550200  | -1.05732000 |
| H  | -4.41298300 | -1.39601300 | 0.25107900  |
| H  | -0.32778700 | -0.37566000 | 0.23808200  |
| H  | -1.11431800 | -1.46795600 | 1.49275600  |
| H  | -4.17402700 | 1.05215700  | 1.27100700  |
| C  | -2.18512300 | 0.31313300  | 1.32088800  |
| O  | -1.81878600 | 0.81843100  | 2.39628400  |
| N  | 0.93534800  | -0.02406600 | -0.09392800 |
| Si | 1.11052800  | 1.65051600  | -0.40371300 |
| Si | 2.15395700  | -1.17455600 | 0.22528200  |
| C  | 3.47059400  | -0.62562000 | 1.50363500  |
| H  | 4.20556200  | -1.41833800 | 1.69812100  |
| H  | 4.02336100  | 0.26006600  | 1.16882600  |
| H  | 2.99233700  | -0.36978100 | 2.45617300  |
| C  | 3.14252000  | -1.70319300 | -1.32772300 |
| H  | 3.89112600  | -2.47348900 | -1.09811900 |
| H  | 2.46945000  | -2.10731800 | -2.09328300 |
| H  | 3.66830500  | -0.85152800 | -1.77459800 |
| C  | 1.43131700  | -2.79068200 | 0.93621000  |
| H  | 2.22784600  | -3.53076400 | 1.08751400  |
| H  | 0.94718300  | -2.61867600 | 1.90337900  |
| H  | 0.68413900  | -3.23809200 | 0.27201900  |
| C  | 0.99518200  | 2.72213000  | 1.16651300  |
| H  | 0.94739200  | 3.79680800  | 0.94482900  |
| H  | 0.10317500  | 2.43944300  | 1.73680800  |
| H  | 1.86433100  | 2.55345900  | 1.81438300  |
| C  | 2.75788100  | 2.11856800  | -1.26380000 |
| H  | 2.86209500  | 1.60595100  | -2.22728700 |
| H  | 2.80366800  | 3.19887100  | -1.45567200 |
| H  | 3.63207900  | 1.85792800  | -0.65607800 |
| C  | -0.24811300 | 2.27247400  | -1.58994300 |
| H  | -0.14102900 | 3.34542300  | -1.79584000 |
| H  | -0.20484400 | 1.74052900  | -2.54769500 |

|   |             |             |             |
|---|-------------|-------------|-------------|
| H | -1.24585200 | 2.11493800  | -1.16917700 |
| H | -2.46704200 | -2.70184200 | 0.06521800  |
| H | -4.19463600 | -1.61603400 | -1.48542800 |
| C | -1.57558900 | -1.84432200 | -1.66698600 |
| H | -0.57800000 | -2.25824500 | -1.49969300 |
| H | -2.11432400 | -2.51069800 | -2.35625300 |
| H | -1.43014200 | -0.88055400 | -2.16551400 |

Cartesian coordinates for optimized **TS-2<sub>H1</sub>** (Flipped) with **(Me<sub>3</sub>Si)<sub>2</sub>N<sup>-</sup>**

|    |             |             |             |
|----|-------------|-------------|-------------|
| C  | 3.23378600  | 0.96388200  | 0.30686300  |
| C  | 2.67741700  | -0.05636700 | 1.31195300  |
| C  | 1.63761500  | -0.97023400 | 0.65108300  |
| C  | 2.75676600  | -0.62364100 | -1.61488600 |
| C  | 3.81280600  | 0.24910600  | -0.92105900 |
| H  | 1.29427400  | -1.75379800 | 1.33243300  |
| H  | 3.54809400  | -0.65808500 | 1.64225700  |
| H  | 2.43038100  | 1.64368100  | -0.00864900 |
| H  | 3.20492000  | -1.28164400 | -2.36751100 |
| H  | 2.04064300  | 0.01708400  | -2.14872400 |
| H  | 0.36486400  | -0.31713500 | 0.42063100  |
| C  | 1.93207300  | -1.50972800 | -0.65788400 |
| O  | 1.46519700  | -2.56869800 | -1.11589700 |
| N  | -0.88860500 | 0.10906800  | 0.25664800  |
| Si | -2.01416700 | -1.19159500 | 0.24601200  |
| Si | -1.13841500 | 1.70778600  | -0.29368900 |
| C  | -0.44621700 | 3.03554000  | 0.89480100  |
| H  | -0.67326300 | 4.04580600  | 0.52906500  |
| H  | -0.88729200 | 2.93465700  | 1.89339200  |
| H  | 0.64047200  | 2.96453900  | 1.00881900  |
| C  | -2.97321700 | 2.20571700  | -0.52504800 |
| H  | -3.04236800 | 3.22433400  | -0.92929200 |
| H  | -3.49999000 | 1.54051600  | -1.21836700 |
| H  | -3.51800200 | 2.18977500  | 0.42524200  |
| C  | -0.32157000 | 2.07253400  | -1.98406400 |
| H  | -0.50550700 | 3.10350300  | -2.31489700 |
| H  | 0.76358900  | 1.92692500  | -1.94397100 |
| H  | -0.71050000 | 1.39708400  | -2.75493200 |
| C  | -3.59766000 | -0.85096800 | 1.27105000  |
| H  | -3.33612500 | -0.57099800 | 2.29862200  |
| H  | -4.20656200 | -0.04184500 | 0.85412700  |
| H  | -4.22981400 | -1.74774300 | 1.32163600  |
| C  | -2.61149800 | -1.67356600 | -1.50547800 |
| H  | -1.74928100 | -1.97093300 | -2.11283500 |
| H  | -3.31487900 | -2.51663800 | -1.48412700 |
| H  | -3.10853000 | -0.84009400 | -2.01677100 |
| C  | -1.27156700 | -2.77574900 | 0.98186800  |
| H  | -0.95539900 | -2.63439300 | 2.02212900  |
| H  | -2.01682200 | -3.58229100 | 0.96732400  |
| H  | -0.40036400 | -3.09194100 | 0.39885500  |
| H  | 4.23767000  | 0.97469000  | -1.62928800 |
| H  | 4.00669700  | 1.58553500  | 0.78293900  |
| C  | 2.11966300  | 0.61280700  | 2.57595100  |
| H  | 1.80685300  | -0.14494700 | 3.30431100  |
| H  | 2.87038500  | 1.25269700  | 3.06057900  |
| H  | 1.24033800  | 1.22040600  | 2.34711200  |
| H  | 4.64995200  | -0.38530600 | -0.59289000 |

Cartesian coordinates for optimized **TS-2<sub>H2</sub>** with **(Me<sub>3</sub>Si)<sub>2</sub>N<sup>-</sup>**

|   |             |             |             |
|---|-------------|-------------|-------------|
| C | -3.03639600 | 1.27039700  | 0.08729900  |
| C | -3.69191200 | 0.48078700  | -1.05292900 |
| C | -2.68882200 | -0.49461400 | -1.68146900 |
| C | -1.59371100 | -0.76446900 | 0.60542200  |
| C | -2.47149200 | 0.35019200  | 1.18981600  |
| H | -3.16373300 | -1.16074100 | -2.40980800 |

|    |             |             |             |
|----|-------------|-------------|-------------|
| H  | -4.55443400 | -0.08027500 | -0.66678300 |
| H  | -4.09182400 | 1.16829700  | -1.81187600 |
| H  | -2.21808300 | 1.87051100  | -0.33070800 |
| H  | -1.33405200 | -1.51839100 | 1.35444900  |
| H  | -0.27698300 | -0.27207000 | 0.36453200  |
| H  | -1.91895500 | 0.07256000  | -2.22535900 |
| C  | -1.96018900 | -1.37901200 | -0.65085500 |
| O  | -1.62206400 | -2.52226500 | -1.01048400 |
| N  | 1.00798400  | 0.08077600  | 0.25527900  |
| Si | 2.05130900  | -1.28122600 | 0.19358000  |
| Si | 1.32246600  | 1.72060600  | -0.09398200 |
| C  | 0.64744000  | 2.27707100  | -1.79550700 |
| H  | 0.81627900  | 3.34653000  | -1.97962700 |
| H  | 1.13679200  | 1.71681100  | -2.60119300 |
| H  | -0.42876600 | 2.09050700  | -1.88244900 |
| C  | 3.17453800  | 2.20293300  | -0.13386600 |
| H  | 3.28949500  | 3.26375600  | -0.39324600 |
| H  | 3.65463500  | 2.04482100  | 0.83792100  |
| H  | 3.73311300  | 1.62123600  | -0.87626100 |
| C  | 0.54348700  | 2.89639000  | 1.19373800  |
| H  | 0.73468000  | 3.94950200  | 0.94873100  |
| H  | -0.54117300 | 2.76277000  | 1.26290700  |
| H  | 0.95917500  | 2.70277400  | 2.18964600  |
| C  | 2.61936200  | -1.72725100 | -1.57729900 |
| H  | 1.74680000  | -1.94709900 | -2.20258600 |
| H  | 3.16523400  | -0.89986500 | -2.04785700 |
| H  | 3.27433200  | -2.60859200 | -1.59294700 |
| C  | 3.66069200  | -1.07584300 | 1.21432600  |
| H  | 3.42781400  | -0.80897400 | 2.25220200  |
| H  | 4.23080000  | -2.01446600 | 1.23288300  |
| H  | 4.31969700  | -0.29803100 | 0.81425700  |
| C  | 1.20691100  | -2.83241600 | 0.88655200  |
| H  | 1.87878400  | -3.69784200 | 0.81049400  |
| H  | 0.94681900  | -2.70764400 | 1.94478200  |
| H  | 0.28658800  | -3.05265400 | 0.33471300  |
| H  | -1.84386200 | 0.97775700  | 1.84191000  |
| H  | -3.75455100 | 1.98115500  | 0.52160400  |
| C  | -3.59874500 | -0.20203900 | 2.08845800  |
| H  | -3.18018000 | -0.82647500 | 2.88590400  |
| H  | -4.17833600 | 0.60397300  | 2.56235400  |
| H  | -4.29530200 | -0.83122800 | 1.52185200  |

Cartesian coordinates for optimized TS-2<sub>H2</sub> (Flipped) with (Me<sub>3</sub>Si)<sub>2</sub>N<sup>-</sup>

|    |             |             |             |
|----|-------------|-------------|-------------|
| C  | 3.32761900  | 0.74022600  | 1.12226100  |
| C  | 2.34673200  | 1.29102600  | 0.06447700  |
| C  | 1.73385400  | 0.19065900  | -0.82210300 |
| C  | 2.97755000  | -1.63564000 | 0.46250700  |
| C  | 2.90323000  | -0.64171100 | 1.62436900  |
| H  | 0.39105300  | 0.02650200  | -0.39385600 |
| H  | 1.53295700  | 1.78451300  | 0.62303100  |
| H  | 4.33145200  | 0.65112700  | 0.67707900  |
| H  | 2.53588700  | -2.60460600 | 0.71999600  |
| H  | 4.02924800  | -1.83771500 | 0.20975000  |
| H  | 1.52009600  | 0.52780500  | -1.84124700 |
| C  | 2.29563600  | -1.14067500 | -0.82992300 |
| O  | 2.19063400  | -1.95013500 | -1.76893700 |
| N  | -0.91057200 | 0.02583000  | -0.06265300 |
| Si | -1.65904900 | -1.51154700 | 0.07188300  |
| Si | -1.67938900 | 1.55100800  | 0.01063900  |
| C  | -1.64539100 | 2.33378400  | 1.75634600  |
| H  | -2.08815900 | 3.33859400  | 1.77318500  |
| H  | -2.19773000 | 1.71256700  | 2.47151600  |
| H  | -0.61597100 | 2.41493400  | 2.12458000  |
| C  | -3.52385500 | 1.55688500  | -0.50931200 |
| H  | -3.94427600 | 2.56842300  | -0.43200100 |
| H  | -3.63691400 | 1.23036000  | -1.54954000 |
| H  | -4.14124800 | 0.89728800  | 0.11022700  |

|   |             |             |             |
|---|-------------|-------------|-------------|
| C | -0.86773500 | 2.82561300  | -1.15257600 |
| H | -1.42106900 | 3.77371600  | -1.13958200 |
| H | 0.16603900  | 3.04141500  | -0.86808700 |
| H | -0.85490400 | 2.45819300  | -2.18489800 |
| C | -2.87124500 | -1.64478800 | 1.55231700  |
| H | -2.34826000 | -1.44062000 | 2.49437100  |
| H | -3.70467100 | -0.93656000 | 1.48176200  |
| H | -3.30229300 | -2.65239600 | 1.62354000  |
| C | -2.66538800 | -2.01660000 | -1.47391200 |
| H | -2.01662400 | -2.02254000 | -2.35723300 |
| H | -3.10038700 | -3.01966300 | -1.37080200 |
| H | -3.48522000 | -1.31636200 | -1.67114300 |
| C | -0.40414800 | -2.90976100 | 0.34541700  |
| H | -0.92370800 | -3.87562600 | 0.39882200  |
| H | 0.33240400  | -2.95897100 | -0.46239400 |
| H | 0.13829300  | -2.77583100 | 1.28871600  |
| H | 3.53935300  | -0.96807400 | 2.45953700  |
| H | 3.42076200  | 1.45627100  | 1.95111300  |
| C | 3.04123800  | 2.38443200  | -0.76607300 |
| H | 2.34914600  | 2.84280000  | -1.48075500 |
| H | 3.44537600  | 3.18512500  | -0.12975600 |
| H | 3.87221000  | 1.95728300  | -1.34152400 |
| H | 1.87565100  | -0.59084000 | 2.00759000  |

Cartesian coordinates for optimized **TS-2<sub>H3</sub>** with **(Me<sub>3</sub>Si)<sub>2</sub>N<sup>-</sup>**

|    |             |             |             |
|----|-------------|-------------|-------------|
| C  | -3.40357300 | -1.58552700 | 0.24967000  |
| C  | -2.04924600 | -1.77648200 | -0.45393200 |
| C  | -1.54242600 | -0.52309600 | -1.18344000 |
| C  | -3.35160800 | 0.89305100  | -0.02629900 |
| C  | -3.47231100 | -0.24639700 | 1.00369500  |
| H  | -0.30858300 | -0.17904800 | -0.58522000 |
| H  | -1.31542000 | -2.10776100 | 0.29857900  |
| H  | -2.14019000 | -2.61921200 | -1.15457700 |
| H  | -4.21003300 | -1.59941900 | -0.49829300 |
| H  | -3.11394200 | 1.84755400  | 0.45984500  |
| H  | -4.31947600 | 1.04629800  | -0.52416800 |
| H  | -1.14568000 | -0.71596000 | -2.18344700 |
| C  | -2.33167500 | 0.68365100  | -1.16882000 |
| O  | -2.20989800 | 1.61637500  | -1.98503700 |
| N  | 0.92564600  | -0.00969900 | -0.09299000 |
| Si | 1.40009200  | 1.61324800  | 0.19757900  |
| Si | 1.90688700  | -1.40972300 | -0.09247500 |
| C  | 1.86922400  | -2.35682800 | 1.56928400  |
| H  | 2.45600900  | -3.28444800 | 1.53537500  |
| H  | 2.27058200  | -1.73633000 | 2.37944100  |
| H  | 0.84070800  | -2.62037700 | 1.84211100  |
| C  | 3.76280700  | -1.10224700 | -0.45565500 |
| H  | 4.32202900  | -2.04730300 | -0.44688600 |
| H  | 3.89729700  | -0.64706800 | -1.44365600 |
| H  | 4.23143300  | -0.43740500 | 0.27829500  |
| C  | 1.36884000  | -2.66144500 | -1.42777600 |
| H  | 2.02394800  | -3.54246700 | -1.42314200 |
| H  | 0.34214200  | -3.00851300 | -1.27881600 |
| H  | 1.42063900  | -2.21071800 | -2.42540700 |
| C  | 2.49680400  | 1.81463200  | 1.75757600  |
| H  | 1.97036900  | 1.44783800  | 2.64687800  |
| H  | 3.43937800  | 1.26009800  | 1.68384100  |
| H  | 2.74925000  | 2.86903900  | 1.93240500  |
| C  | 2.38800200  | 2.39397000  | -1.24137200 |
| H  | 1.79162500  | 2.36648900  | -2.16039600 |
| H  | 2.64714700  | 3.44216900  | -1.04111900 |
| H  | 3.32051500  | 1.85134400  | -1.43552300 |
| C  | -0.08647400 | 2.75935600  | 0.48261800  |
| H  | 0.25679000  | 3.79058500  | 0.63943300  |
| H  | -0.76916100 | 2.74963700  | -0.37289900 |
| H  | -0.65450100 | 2.46221300  | 1.37178200  |
| H  | -4.46056800 | -0.17392000 | 1.48531800  |

|   |             |             |            |
|---|-------------|-------------|------------|
| H | -3.59695700 | -2.42230300 | 0.93720600 |
| C | -2.41522900 | -0.14843200 | 2.11558100 |
| H | -2.54072500 | 0.77964700  | 2.68636900 |
| H | -2.50245400 | -0.98618700 | 2.81971200 |
| H | -1.39902400 | -0.15215500 | 1.70993700 |

Cartesian coordinates for optimized **TS-2<sub>H3</sub>** (Flipped) with **(Me<sub>3</sub>Si)<sub>2</sub>N<sup>-</sup>**

|    |             |             |             |
|----|-------------|-------------|-------------|
| C  | 3.01588100  | 0.79441700  | -0.88670900 |
| C  | 3.79955200  | -0.09243300 | 0.09151100  |
| C  | 2.81743600  | -0.93473900 | 0.92113300  |
| C  | 1.24631100  | -1.04170400 | -1.08390200 |
| C  | 2.13778500  | -0.04452000 | -1.82605500 |
| H  | 3.34279400  | -1.66918600 | 1.54258300  |
| H  | 4.41293200  | -0.78434300 | -0.50901000 |
| H  | 2.38738000  | 1.48513500  | -0.30731700 |
| H  | 0.75773500  | -1.74995800 | -1.75812300 |
| H  | 0.06149500  | -0.38716400 | -0.61201700 |
| H  | 2.27009600  | -0.27347700 | 1.61098700  |
| C  | 1.77204800  | -1.70334000 | 0.08591000  |
| O  | 1.36707000  | -2.79076400 | 0.53896300  |
| N  | -1.12300800 | 0.12010700  | -0.28328500 |
| Si | -2.30091800 | -1.09719900 | -0.00454200 |
| Si | -1.15653300 | 1.78643100  | 0.08044000  |
| C  | -0.12924500 | 2.24466800  | 1.62777300  |
| H  | -0.11916200 | 3.32674600  | 1.81519300  |
| H  | -0.54070800 | 1.75384300  | 2.51785500  |
| H  | 0.91075900  | 1.91364200  | 1.53065300  |
| C  | -2.89558500 | 2.50693700  | 0.42729600  |
| H  | -2.82606400 | 3.57300100  | 0.68131700  |
| H  | -3.55220600 | 2.41556500  | -0.44475900 |
| H  | -3.38849200 | 2.00131800  | 1.26568600  |
| C  | -0.46584000 | 2.84877600  | -1.34808100 |
| H  | -0.47172000 | 3.91797200  | -1.09831300 |
| H  | 0.56321000  | 2.57132600  | -1.59908500 |
| H  | -1.06992200 | 2.71205800  | -2.25280100 |
| C  | -2.60459700 | -1.45506700 | 1.84949600  |
| H  | -1.67178600 | -1.78131600 | 2.32288500  |
| H  | -2.95206900 | -0.56103400 | 2.38234700  |
| H  | -3.35273000 | -2.24436000 | 2.00216200  |
| C  | -4.02445000 | -0.69279700 | -0.73928500 |
| H  | -3.94415800 | -0.47006100 | -1.81006400 |
| H  | -4.70513000 | -1.54761300 | -0.62810900 |
| H  | -4.49745800 | 0.16992100  | -0.25812800 |
| C  | -1.78781700 | -2.74672900 | -0.78842800 |
| H  | -2.53403000 | -3.52205100 | -0.56892000 |
| H  | -1.70874100 | -2.66322400 | -1.87923600 |
| H  | -0.81616200 | -3.07430900 | -0.40268200 |
| H  | 1.52110900  | 0.62757600  | -2.44004700 |
| H  | 3.71055800  | 1.41773700  | -1.46926700 |
| C  | 4.74674600  | 0.72193400  | 0.98122500  |
| H  | 5.30641500  | 0.07514900  | 1.66791900  |
| H  | 5.47335500  | 1.28878400  | 0.38516200  |
| H  | 4.18497700  | 1.44114500  | 1.59060200  |
| H  | 2.80718100  | -0.55912400 | -2.54005500 |

Cartesian coordinates for optimized **TS-2<sub>H4</sub>** with **(Me<sub>3</sub>Si)<sub>2</sub>N<sup>-</sup>**

|   |             |             |             |
|---|-------------|-------------|-------------|
| C | -2.92182200 | 1.32138500  | -0.51198900 |
| C | -2.23119600 | 0.42049200  | -1.54758300 |
| C | -1.43617600 | -0.72334200 | -0.91371600 |
| C | -2.78217900 | -0.47287600 | 1.23720400  |
| C | -3.72582000 | 0.51361200  | 0.52443700  |
| H | -1.10995000 | -1.46512500 | -1.64750100 |
| H | -2.99970200 | 0.03722200  | -2.24199000 |
| H | -1.56918400 | 1.03935200  | -2.17043600 |

|    |             |             |             |
|----|-------------|-------------|-------------|
| H  | -2.16251300 | 1.90677700  | 0.02223400  |
| H  | -3.33108700 | -1.14650700 | 1.90528100  |
| H  | -2.07546800 | 0.08863300  | 1.86491200  |
| H  | -0.13960000 | -0.25605500 | -0.52649200 |
| C  | -1.94616000 | -1.35116200 | 0.28204100  |
| O  | -1.66192400 | -2.50271300 | 0.66344400  |
| N  | 1.12646400  | 0.07503600  | -0.28260700 |
| Si | 2.14313400  | -1.30089700 | -0.13941200 |
| Si | 1.41765400  | 1.70478700  | 0.12835500  |
| C  | 0.78086800  | 2.91033900  | -1.20871400 |
| H  | 0.95793500  | 3.95717700  | -0.92872700 |
| H  | 1.28971800  | 2.72722400  | -2.16247100 |
| H  | -0.29318600 | 2.79005600  | -1.38475800 |
| C  | 3.26041100  | 2.16644400  | 0.36349000  |
| H  | 3.35794800  | 3.22001600  | 0.65730700  |
| H  | 3.73745600  | 1.56260200  | 1.14410900  |
| H  | 3.83370800  | 2.02482900  | -0.55915100 |
| C  | 0.57721900  | 2.23443000  | 1.76313700  |
| H  | 0.73002700  | 3.29931800  | 1.98400200  |
| H  | -0.50285400 | 2.05162100  | 1.73600500  |
| H  | 0.97997400  | 1.65633300  | 2.60340700  |
| C  | 3.84483900  | -1.10207600 | -0.99873100 |
| H  | 3.71482500  | -0.82551900 | -2.05193100 |
| H  | 4.46771400  | -0.33235300 | -0.53069400 |
| H  | 4.40747200  | -2.04496000 | -0.97014800 |
| C  | 2.53410700  | -1.77511300 | 1.67160100  |
| H  | 1.60332800  | -1.99134800 | 2.20784400  |
| H  | 3.17473400  | -2.66455800 | 1.73838000  |
| H  | 3.04155800  | -0.96009300 | 2.20280100  |
| C  | 1.34937000  | -2.83126100 | -0.93107500 |
| H  | 1.19759400  | -2.69052100 | -2.00821800 |
| H  | 1.99727900  | -3.70824100 | -0.79965200 |
| H  | 0.37521300  | -3.04230700 | -0.47647400 |
| H  | -4.12772400 | 1.21788300  | 1.26980700  |
| H  | -3.57857300 | 2.04633200  | -1.01544700 |
| C  | -4.92359400 | -0.21645200 | -0.10453000 |
| H  | -5.52296000 | -0.71744000 | 0.66501000  |
| H  | -5.57961600 | 0.47933900  | -0.64295100 |
| H  | -4.59414200 | -0.98421600 | -0.81198600 |

Cartesian coordinates for optimized **TS-2<sub>H4</sub>** (Flipped) with **(Me<sub>3</sub>Si)<sub>2</sub>N<sup>-</sup>**

|    |             |             |             |
|----|-------------|-------------|-------------|
| C  | -3.19601900 | -1.68809300 | -0.46294700 |
| C  | -3.37710900 | -0.20840700 | -0.82515100 |
| C  | -3.22301400 | 0.62898300  | 0.45233700  |
| C  | -1.25448300 | -0.91569600 | 1.05012100  |
| C  | -1.76863700 | -1.95409600 | 0.04033700  |
| H  | -3.09536400 | 1.69456700  | 0.22154000  |
| H  | -2.56667500 | 0.06241600  | -1.51820400 |
| H  | -3.92923100 | -1.94895600 | 0.31666300  |
| H  | -0.07318100 | -0.38852900 | 0.49501200  |
| H  | -0.78890300 | -1.34699600 | 1.94002900  |
| H  | -4.14928700 | 0.56510500  | 1.04396000  |
| C  | -2.08470400 | 0.20979900  | 1.41058100  |
| O  | -1.92579100 | 0.91231300  | 2.42551900  |
| N  | 1.11673800  | -0.01793200 | -0.01145600 |
| Si | 1.21242800  | 1.67690800  | -0.24133000 |
| Si | 2.33436400  | -1.21009700 | -0.05432900 |
| C  | 3.85883700  | -0.85039400 | 1.04896300  |
| H  | 4.58352900  | -1.67533800 | 1.02206000  |
| H  | 4.38473500  | 0.05974300  | 0.73858300  |
| H  | 3.55081000  | -0.70924800 | 2.09162500  |
| C  | 3.04144200  | -1.54461900 | -1.80248500 |
| H  | 3.77868300  | -2.35878600 | -1.79946300 |
| H  | 2.23802900  | -1.82244400 | -2.49494900 |
| H  | 3.53268200  | -0.65486100 | -2.21332100 |
| C  | 1.67803900  | -2.89213000 | 0.55692400  |
| H  | 2.47752600  | -3.64419400 | 0.54925600  |



|   |             |             |             |
|---|-------------|-------------|-------------|
| H | 1.29350200  | -2.82288300 | 1.58025600  |
| H | 0.86339100  | -3.26310900 | -0.07334200 |
| C | 0.99638900  | 2.64572000  | 1.38120600  |
| H | 0.92263300  | 3.72893200  | 1.21513600  |
| H | 0.09189200  | 2.30988300  | 1.90097700  |
| H | 1.84736100  | 2.46805700  | 2.05062600  |
| C | 2.85823500  | 2.27509300  | -1.01818300 |
| H | 3.03324600  | 1.81685900  | -1.99857500 |
| H | 2.84005100  | 3.36357400  | -1.16175800 |
| H | 3.72282800  | 2.04402800  | -0.38582900 |
| C | -0.13916600 | 2.29480300  | -1.43910300 |
| H | -0.09589400 | 3.38339000  | -1.57495700 |
| H | -0.02852200 | 1.82786700  | -2.42513400 |
| H | -1.13884800 | 2.04770700  | -1.06788800 |
| H | -1.72685600 | -2.96343200 | 0.47305500  |
| H | -3.41949500 | -2.32632700 | -1.33094900 |
| C | -4.71130800 | 0.06785900  | -1.52882200 |
| H | -4.82658200 | 1.13272300  | -1.76505200 |
| H | -4.79682200 | -0.49519300 | -2.46681200 |
| H | -5.55655900 | -0.22084000 | -0.89006700 |
| H | -1.10561900 | -1.98498900 | -0.83987900 |

Cartesian coordinates for optimized **TS-3<sub>H1</sub>** with **(Me<sub>3</sub>Si)<sub>2</sub>N<sup>-</sup>**

|    |             |             |             |
|----|-------------|-------------|-------------|
| C  | -3.57874700 | -0.83393400 | -0.29015800 |
| C  | -2.79922200 | -2.12288100 | -0.01531100 |
| C  | -1.90185400 | -2.45252600 | -1.20907500 |
| C  | -1.28317600 | 0.03619000  | -1.09473900 |
| C  | -2.67173600 | 0.41201800  | -0.51234600 |
| H  | -1.18843500 | -3.25382800 | -0.98045200 |
| H  | -2.19341600 | -2.00092500 | 0.88788800  |
| H  | -3.49481500 | -2.95055900 | 0.18577100  |
| H  | -4.18045700 | -0.99480800 | -1.19651000 |
| H  | -0.09664900 | 0.03873400  | -0.30969800 |
| H  | -0.92656900 | 0.81992000  | -1.76447400 |
| H  | -2.51136900 | -2.82323000 | -2.04647200 |
| C  | -1.10194600 | -1.25024400 | -1.74376200 |
| O  | -0.26960100 | -1.46835400 | -2.63904700 |
| N  | 1.17211700  | 0.13909700  | 0.18557700  |
| Si | 1.81108900  | -1.22815100 | 1.00098500  |
| Si | 2.15839400  | 1.33328000  | -0.55785200 |
| C  | 3.85982300  | 0.71709800  | -1.18911400 |
| H  | 4.42272400  | 1.54505100  | -1.64042500 |
| H  | 4.48512700  | 0.29029600  | -0.39718500 |
| H  | 3.72807400  | -0.05316800 | -1.95705500 |
| C  | 2.55964100  | 2.79326600  | 0.61532600  |
| H  | 3.16380900  | 3.56676800  | 0.12253500  |
| H  | 1.63902600  | 3.26708900  | 0.97576800  |
| H  | 3.11302800  | 2.44842900  | 1.49691400  |
| C  | 1.36011800  | 2.09929900  | -2.10893500 |
| H  | 2.07668400  | 2.76269100  | -2.61089400 |
| H  | 1.07057500  | 1.30913000  | -2.80938900 |
| H  | 0.46645700  | 2.69037900  | -1.88339300 |
| C  | 2.54677200  | -2.54700900 | -0.16915800 |
| H  | 2.72385600  | -3.50633000 | 0.33517100  |
| H  | 1.85253000  | -2.71197700 | -1.00113900 |
| H  | 3.49797500  | -2.21764500 | -0.60218600 |
| C  | 3.17173700  | -0.79626900 | 2.28076200  |
| H  | 2.77577200  | -0.12544000 | 3.05267900  |
| H  | 3.54341000  | -1.69933000 | 2.78321500  |
| H  | 4.03355500  | -0.29623100 | 1.82524200  |
| C  | 0.50232700  | -2.16117400 | 2.02782400  |
| H  | 0.98509300  | -2.96586600 | 2.59756000  |
| H  | -0.00848500 | -1.50810100 | 2.74328500  |
| H  | -0.25943700 | -2.62413100 | 1.39386000  |
| H  | -3.18308400 | 1.00868600  | -1.28721400 |
| H  | -4.30035100 | -0.65793100 | 0.51568200  |
| C  | -2.63857000 | 1.39273700  | 0.71891900  |

|   |             |             |             |
|---|-------------|-------------|-------------|
| C | -1.72711000 | 2.59106500  | 0.38951000  |
| H | -1.76843600 | 3.33942400  | 1.19167300  |
| H | -0.69041900 | 2.27130700  | 0.27988400  |
| H | -2.03877600 | 3.08289900  | -0.54075500 |
| C | -2.10874900 | 0.71685800  | 1.99570600  |
| H | -2.74037800 | -0.12415000 | 2.30397000  |
| H | -1.09108500 | 0.35281500  | 1.83942300  |
| H | -2.08802700 | 1.43197900  | 2.82883900  |
| C | -4.05400000 | 1.95133600  | 0.98770300  |
| H | -4.02562800 | 2.69607300  | 1.79294600  |
| H | -4.45995200 | 2.44324700  | 0.09466800  |
| H | -4.76453100 | 1.17509600  | 1.29083300  |

Cartesian coordinates for optimized **TS-3<sub>H1</sub>** (Flipped) with **(Me<sub>3</sub>Si)<sub>2</sub>N<sup>-</sup>**

|    |             |             |             |
|----|-------------|-------------|-------------|
| C  | 2.96181900  | 0.15909500  | -1.26909600 |
| C  | 2.63717600  | -0.32155200 | 0.15875500  |
| C  | 1.27856600  | -1.05272300 | 0.18596300  |
| C  | 1.54539600  | -1.69549100 | -2.26882400 |
| C  | 2.91800100  | -1.01206300 | -2.26069100 |
| H  | 1.09041100  | -1.51644000 | 1.15554100  |
| H  | 3.43050100  | -1.05697400 | 0.40504100  |
| H  | 2.23803100  | 0.91918300  | -1.58420500 |
| H  | 1.55232700  | -2.62442900 | -2.84906800 |
| H  | 0.80563400  | -1.03189100 | -2.73984600 |
| H  | 0.04723200  | -0.30130200 | 0.07500800  |
| C  | 1.02104300  | -2.02411100 | -0.86064100 |
| O  | 0.30243700  | -3.02958000 | -0.72479400 |
| N  | -1.20928000 | 0.16431700  | 0.10222700  |
| Si | -2.30188900 | -0.90065800 | 0.90486500  |
| Si | -1.69334300 | 1.52069000  | -0.82210200 |
| C  | -1.99371300 | 3.09864000  | 0.22075900  |
| H  | -2.27653000 | 3.95786000  | -0.40213100 |
| H  | -2.79409700 | 2.93940600  | 0.95250500  |
| H  | -1.09211100 | 3.37365000  | 0.78018600  |
| C  | -3.30583200 | 1.27859900  | -1.82992400 |
| H  | -3.54907300 | 2.18266100  | -2.40406500 |
| H  | -3.20082300 | 0.45024700  | -2.53995500 |
| H  | -4.16783500 | 1.05333200  | -1.19205400 |
| C  | -0.40223600 | 2.02427000  | -2.13289500 |
| H  | -0.78077800 | 2.85841000  | -2.73782600 |
| H  | 0.54014700  | 2.34738600  | -1.68062700 |
| H  | -0.17833000 | 1.19523000  | -2.81317400 |
| C  | -3.67209100 | 0.02855100  | 1.87467700  |
| H  | -3.23247700 | 0.68873600  | 2.63199800  |
| H  | -4.30083600 | 0.64941900  | 1.22571900  |
| H  | -4.33459500 | -0.67744800 | 2.39299200  |
| C  | -3.19279400 | -2.11245500 | -0.26791800 |
| H  | -2.43493000 | -2.68491900 | -0.81346900 |
| H  | -3.82726900 | -2.82177700 | 0.28019500  |
| H  | -3.82368600 | -1.59435800 | -0.99897300 |
| C  | -1.43091200 | -2.00066600 | 2.18707800  |
| H  | -0.84395400 | -1.41919900 | 2.90753000  |
| H  | -2.17014800 | -2.58414200 | 2.75166700  |
| H  | -0.76212300 | -2.69735000 | 1.67296300  |
| H  | 3.18294000  | -0.66698200 | -3.27015700 |
| H  | 3.95422900  | 0.62499100  | -1.31158700 |
| C  | 2.81126700  | 0.77894900  | 1.26723700  |
| H  | 3.68690700  | -1.74569200 | -1.97507200 |
| C  | 1.84984100  | 1.96592800  | 1.07903200  |
| H  | 0.81141100  | 1.62644800  | 1.06271800  |
| H  | 1.96560300  | 2.68686200  | 1.89935600  |
| H  | 2.05042900  | 2.50240100  | 0.14528800  |
| C  | 4.26389300  | 1.30517600  | 1.26809800  |
| H  | 4.42435600  | 1.98891700  | 2.11112400  |
| H  | 4.98493200  | 0.48354500  | 1.36452700  |
| H  | 4.50558800  | 1.85616500  | 0.35364100  |
| C  | 2.54774200  | 0.15434500  | 2.65424800  |

|   |            |             |            |
|---|------------|-------------|------------|
| H | 3.17321400 | -0.73268600 | 2.81534700 |
| H | 2.77783300 | 0.87490400  | 3.44960400 |
| H | 1.50356600 | -0.14515400 | 2.76818300 |

Cartesian coordinates for optimized **TS-3<sub>H2</sub>** with **(Me<sub>3</sub>Si)<sub>2</sub>N<sup>-</sup>**

|    |             |             |             |
|----|-------------|-------------|-------------|
| C  | 2.30879400  | 1.42644600  | 0.78240400  |
| C  | 2.65616200  | 0.78842400  | 2.13468900  |
| C  | 1.57787300  | -0.21473100 | 2.55986200  |
| C  | 1.12008800  | -0.70136200 | 0.09855300  |
| C  | 2.05911800  | 0.42011900  | -0.36958300 |
| H  | 1.87686800  | -0.79400900 | 3.43990200  |
| H  | 3.62635000  | 0.28028400  | 2.07972200  |
| H  | 2.76941300  | 1.57460800  | 2.89514400  |
| H  | 1.38075400  | 1.99693800  | 0.91592200  |
| H  | 1.03734100  | -1.52347300 | -0.61381700 |
| H  | -0.21586400 | -0.24875000 | -0.00583600 |
| H  | 0.66102600  | 0.32819100  | 2.83281900  |
| C  | 1.19342400  | -1.20914700 | 1.45217400  |
| O  | 0.83803700  | -2.35136300 | 1.79735700  |
| N  | -1.50866800 | 0.06012400  | -0.23206200 |
| Si | -2.49837700 | -1.33719000 | -0.35450800 |
| Si | -1.95961600 | 1.69794700  | -0.07238700 |
| C  | -1.71673100 | 2.38122300  | 1.69811300  |
| H  | -1.96968200 | 3.44755800  | 1.76890600  |
| H  | -2.35396100 | 1.83792600  | 2.40612800  |
| H  | -0.68252100 | 2.26199000  | 2.03971700  |
| C  | -3.78943700 | 2.08281900  | -0.48421200 |
| H  | -4.00442400 | 3.14641800  | -0.31605900 |
| H  | -4.02458300 | 1.85870400  | -1.53033800 |
| H  | -4.48099300 | 1.50565700  | 0.14037200  |
| C  | -0.95816600 | 2.84648600  | -1.22439300 |
| H  | -1.25223000 | 3.89730400  | -1.10212000 |
| H  | 0.11840900  | 2.77916700  | -1.03528500 |
| H  | -1.12166100 | 2.57245500  | -2.27334400 |
| C  | -3.51621900 | -1.69289900 | 1.22552400  |
| H  | -2.84349900 | -1.83843000 | 2.07821100  |
| H  | -4.18672500 | -0.85992500 | 1.47117200  |
| H  | -4.13234200 | -2.59648800 | 1.12625500  |
| C  | -3.77370400 | -1.26722600 | -1.78350400 |
| H  | -3.27283900 | -1.05796900 | -2.73635300 |
| H  | -4.29537600 | -2.22822500 | -1.88667600 |
| H  | -4.53449200 | -0.49377200 | -1.63439400 |
| C  | -1.46668400 | -2.89636900 | -0.68123300 |
| H  | -2.11714200 | -3.78064500 | -0.71380000 |
| H  | -0.94516100 | -2.83577600 | -1.64439100 |
| H  | -0.71480400 | -3.04290000 | 0.10169700  |
| H  | 1.52764600  | 0.99754400  | -1.14413400 |
| H  | 3.07169300  | 2.16341400  | 0.50648300  |
| C  | 3.35132400  | -0.08519000 | -1.13715000 |
| C  | 4.19286600  | -1.09099800 | -0.32770900 |
| H  | 4.98748000  | -1.51885700 | -0.95356600 |
| H  | 4.67831700  | -0.61913200 | 0.53236900  |
| H  | 3.57319600  | -1.91164300 | 0.04434300  |
| C  | 4.24636100  | 1.10466300  | -1.54476400 |
| H  | 5.04490200  | 0.77477800  | -2.22171000 |
| H  | 3.66665600  | 1.87549500  | -2.06776400 |
| H  | 4.72810200  | 1.57622900  | -0.68227300 |
| C  | 2.89914700  | -0.77924300 | -2.44201400 |
| H  | 2.29212300  | -0.10463500 | -3.05725500 |
| H  | 3.76888000  | -1.08642300 | -3.03701600 |
| H  | 2.30213900  | -1.67225700 | -2.24148000 |

Cartesian coordinates for optimized **TS-3<sub>H2</sub>** (Flipped) with **(Me<sub>3</sub>Si)<sub>2</sub>N<sup>-</sup>**

|   |            |            |            |
|---|------------|------------|------------|
| C | 2.90872800 | 1.32245500 | 0.64106600 |
|---|------------|------------|------------|

|    |             |             |             |
|----|-------------|-------------|-------------|
| C  | 2.18533000  | 0.31571800  | -0.28354600 |
| C  | 1.20561000  | -0.58290700 | 0.49839100  |
| C  | 1.57255400  | 0.71148400  | 2.67421200  |
| C  | 1.97691100  | 1.85145700  | 1.73658200  |
| H  | -0.10708500 | -0.21761400 | 0.16878600  |
| H  | 1.60290800  | 0.92522900  | -0.99446800 |
| H  | 3.77117800  | 0.84370800  | 1.12803700  |
| H  | 0.73415400  | 0.99209800  | 3.32349700  |
| H  | 2.40532900  | 0.45965900  | 3.34667500  |
| H  | 1.15379000  | -1.60475400 | 0.12247700  |
| C  | 1.18176200  | -0.58704400 | 1.94515000  |
| O  | 0.77578700  | -1.53329300 | 2.64293900  |
| N  | -1.38674400 | -0.01551600 | -0.24122700 |
| Si | -2.35156500 | -1.42708100 | -0.08982400 |
| Si | -1.92081600 | 1.59069800  | -0.46177700 |
| C  | -2.15795800 | 2.55477000  | 1.17437100  |
| H  | -2.44105900 | 3.60232300  | 1.00485300  |
| H  | -2.94317900 | 2.08962800  | 1.78222900  |
| H  | -1.24203100 | 2.54918400  | 1.77619900  |
| C  | -3.59661800 | 1.76057700  | -1.37380500 |
| H  | -3.87556500 | 2.81738000  | -1.47944600 |
| H  | -3.54952700 | 1.32682500  | -2.37897000 |
| H  | -4.41028100 | 1.25916100  | -0.83728400 |
| C  | -0.70810000 | 2.63063100  | -1.50852500 |
| H  | -1.10423500 | 3.63994500  | -1.68153900 |
| H  | 0.27008400  | 2.73834000  | -1.02856500 |
| H  | -0.54204900 | 2.16370500  | -2.48641100 |
| C  | -3.64010800 | -1.33162500 | 1.32244400  |
| H  | -3.13447700 | -1.17608900 | 2.28218600  |
| H  | -4.34053400 | -0.49934900 | 1.18010000  |
| H  | -4.23305800 | -2.25257300 | 1.40098300  |
| C  | -3.35135700 | -1.85285500 | -1.66849000 |
| H  | -2.68115700 | -1.94730800 | -2.53133400 |
| H  | -3.88336100 | -2.80701500 | -1.55437600 |
| H  | -4.09493700 | -1.08674600 | -1.91343400 |
| C  | -1.29866100 | -2.96620500 | 0.26758700  |
| H  | -1.94761000 | -3.83455100 | 0.44315600  |
| H  | -0.64584900 | -3.21211900 | -0.57912500 |
| H  | -0.66466400 | -2.81667600 | 1.14818000  |
| H  | 2.46414200  | 2.66106600  | 2.29810300  |
| H  | 3.30781000  | 2.15821000  | 0.05296500  |
| C  | 3.18152400  | -0.48823100 | -1.20175200 |
| H  | 1.08484400  | 2.29013000  | 1.27232500  |
| C  | 4.02249000  | -1.50010100 | -0.39923200 |
| H  | 3.38416200  | -2.20703700 | 0.13739900  |
| H  | 4.68016500  | -2.07090800 | -1.06766000 |
| H  | 4.66034100  | -1.00262400 | 0.33977900  |
| C  | 2.38002600  | -1.24779200 | -2.28013500 |
| H  | 1.77377200  | -0.55551500 | -2.87541400 |
| H  | 3.05628400  | -1.77894600 | -2.96268800 |
| H  | 1.70103900  | -1.98418000 | -1.84335300 |
| C  | 4.13319900  | 0.48240500  | -1.93418900 |
| H  | 4.74473300  | -0.05586400 | -2.66956000 |
| H  | 3.57012200  | 1.25462900  | -2.47264600 |
| H  | 4.81804300  | 0.98655100  | -1.24495000 |

Cartesian coordinates for optimized **TS-3<sub>H3</sub>** with **(Me<sub>3</sub>Si)<sub>2</sub>N<sup>-</sup>**

|   |             |             |             |
|---|-------------|-------------|-------------|
| C | -2.86809000 | 0.03133100  | -1.65796200 |
| C | -1.39056700 | -0.41400400 | -1.63422800 |
| C | -0.45188200 | 0.71322500  | -1.19753100 |
| C | -2.14386000 | 0.90198000  | 0.63731600  |
| C | -3.35799100 | 0.58755800  | -0.28062900 |
| H | 0.76319500  | 0.21225200  | -0.65741900 |
| H | -1.30278300 | -1.28440600 | -0.96939500 |
| H | -1.10620700 | -0.77963000 | -2.62958500 |
| H | -2.97262900 | 0.81977600  | -2.41396300 |
| H | -1.76601500 | -0.02512700 | 1.08991600  |

|    |             |             |             |
|----|-------------|-------------|-------------|
| H  | -2.42057800 | 1.58291000  | 1.44551100  |
| H  | -0.03670200 | 1.29363200  | -2.02624700 |
| C  | -0.99651300 | 1.55220700  | -0.15585000 |
| O  | -0.60628600 | 2.68942000  | 0.16324500  |
| N  | 1.97518100  | -0.13277100 | -0.21883300 |
| Si | 2.94834600  | 1.24891300  | 0.09836600  |
| Si | 2.35343100  | -1.76957500 | 0.06703100  |
| C  | 3.04022500  | -2.13322200 | 1.81864900  |
| H  | 3.25012400  | -3.20171500 | 1.96209900  |
| H  | 3.96968300  | -1.58598100 | 2.01460900  |
| H  | 2.31728000  | -1.82816900 | 2.58445900  |
| C  | 3.63718600  | -2.50856100 | -1.14724900 |
| H  | 3.81472500  | -3.57645900 | -0.96126200 |
| H  | 3.28971000  | -2.40191000 | -2.18184600 |
| H  | 4.60129200  | -1.99297600 | -1.07348700 |
| C  | 0.82305600  | -2.89557600 | -0.09820100 |
| H  | 1.08730300  | -3.93934900 | 0.11579200  |
| H  | 0.03212400  | -2.60269500 | 0.60142000  |
| H  | 0.39973200  | -2.85954900 | -1.10729900 |
| C  | 4.83020600  | 0.90254700  | -0.03270900 |
| H  | 5.16849400  | 0.13784700  | 0.67654800  |
| H  | 5.09839300  | 0.55938800  | -1.03889200 |
| H  | 5.40666600  | 1.81477700  | 0.17082800  |
| C  | 2.58283600  | 2.65392700  | -1.12621800 |
| H  | 1.54879500  | 2.98883700  | -0.99232700 |
| H  | 3.24842900  | 3.51014800  | -0.95343400 |
| H  | 2.71410300  | 2.33015200  | -2.16564000 |
| C  | 2.66399600  | 1.97862800  | 1.83781200  |
| H  | 3.28652600  | 2.86400500  | 2.02407000  |
| H  | 1.61475900  | 2.27953600  | 1.92984100  |
| H  | 2.87925300  | 1.24457400  | 2.62374300  |
| H  | -3.84635800 | 1.55380500  | -0.47334100 |
| H  | -3.50842100 | -0.79508300 | -1.99411200 |
| C  | -4.46224500 | -0.28830500 | 0.41028600  |
| C  | -4.00091600 | -1.74281400 | 0.63133000  |
| H  | -3.76506100 | -2.24319800 | -0.31284900 |
| H  | -3.10911000 | -1.79099200 | 1.26355000  |
| H  | -4.78945200 | -2.32357900 | 1.12641200  |
| C  | -4.84221800 | 0.32065000  | 1.77658700  |
| H  | -5.12919900 | 1.37403200  | 1.67365000  |
| H  | -5.69307100 | -0.21638000 | 2.21436900  |
| H  | -4.01501400 | 0.26958100  | 2.48964900  |
| C  | -5.73527200 | -0.29371700 | -0.46380200 |
| H  | -6.53140200 | -0.88042700 | 0.01158100  |
| H  | -6.11344000 | 0.72541400  | -0.60932300 |
| H  | -5.55370200 | -0.72486500 | -1.45290200 |

Cartesian coordinates for optimized **TS-3<sub>H3</sub>** (Flipped) with **(Me<sub>3</sub>Si)<sub>2</sub>N<sup>-</sup>**

|    |             |             |             |
|----|-------------|-------------|-------------|
| C  | -2.21682900 | 0.47181800  | 1.24253900  |
| C  | -3.03960700 | -0.47830600 | 0.35106900  |
| C  | -2.06757900 | -1.20260500 | -0.60141700 |
| C  | -0.29443100 | -1.21457700 | 1.24104700  |
| C  | -1.18939700 | -0.30495400 | 2.08049500  |
| H  | -2.56080800 | -1.98669200 | -1.18188500 |
| H  | -3.46896600 | -1.24763700 | 1.01559300  |
| H  | -1.69055500 | 1.19659400  | 0.60847000  |
| H  | 0.30414300  | -1.89729100 | 1.84956300  |
| H  | 0.78866500  | -0.46359000 | 0.69021200  |
| H  | -1.64617500 | -0.48878100 | -1.32429900 |
| C  | -0.87802900 | -1.88935600 | 0.10835600  |
| O  | -0.43472400 | -2.92790400 | -0.41648200 |
| N  | 1.90360500  | 0.14256800  | 0.28037000  |
| Si | 3.14574500  | -0.97218000 | -0.12060700 |
| Si | 1.78242800  | 1.81245600  | -0.04616300 |
| C  | 0.61148100  | 2.21427900  | -1.50439900 |
| H  | 0.50267300  | 3.29499900  | -1.66632800 |
| H  | 0.99313400  | 1.77269400  | -2.43272000 |

|   |             |             |             |
|---|-------------|-------------|-------------|
| H | -0.38945500 | 1.80003300  | -1.33956900 |
| C | 3.43109500  | 2.67293200  | -0.49917200 |
| H | 3.26245600  | 3.73538700  | -0.71957300 |
| H | 4.15532600  | 2.61485300  | 0.32067600  |
| H | 3.89787400  | 2.22454500  | -1.38377400 |
| C | 1.11845900  | 2.79355200  | 1.45160900  |
| H | 1.02852000  | 3.86448500  | 1.22670600  |
| H | 0.13277100  | 2.43608100  | 1.76718100  |
| H | 1.79345900  | 2.68620300  | 2.30889200  |
| C | 3.34332800  | -1.25141000 | -2.00253200 |
| H | 2.40552500  | -1.63110300 | -2.42335100 |
| H | 3.58829100  | -0.31910900 | -2.52667200 |
| H | 4.13332500  | -1.97867100 | -2.23269200 |
| C | 4.88233300  | -0.46004600 | 0.50816400  |
| H | 4.86195300  | -0.27794900 | 1.58938800  |
| H | 5.61507500  | -1.25616800 | 0.31931500  |
| H | 5.25448700  | 0.45116100  | 0.02784800  |
| C | 2.81521700  | -2.67911200 | 0.63882200  |
| H | 3.59579400  | -3.38903800 | 0.33414100  |
| H | 2.81778500  | -2.63597200 | 1.73486200  |
| H | 1.84225900  | -3.06717900 | 0.31813400  |
| H | -0.57571000 | 0.41164200  | 2.64499100  |
| H | -2.86642800 | 1.05105500  | 1.91065300  |
| C | -4.27177000 | 0.18891400  | -0.35677100 |
| H | -1.74512000 | -0.87934700 | 2.84457200  |
| C | -5.28179700 | 0.68013900  | 0.70330900  |
| H | -4.86476800 | 1.46841500  | 1.33662000  |
| H | -6.18037000 | 1.08641900  | 0.22231000  |
| H | -5.59696900 | -0.14201200 | 1.35718100  |
| C | -4.99906800 | -0.84739300 | -1.24018100 |
| H | -4.38715800 | -1.16303900 | -2.08935000 |
| H | -5.25851100 | -1.74440000 | -0.66504900 |
| H | -5.92982600 | -0.42608900 | -1.64033300 |
| C | -3.85935100 | 1.38559700  | -1.23732400 |
| H | -4.73522500 | 1.80702300  | -1.74671800 |
| H | -3.40442200 | 2.18583100  | -0.64559700 |
| H | -3.13924900 | 1.09120300  | -2.00703400 |

Cartesian coordinates for optimized TS-3<sub>H4</sub> with (Me<sub>3</sub>Si)<sub>2</sub>N<sup>-</sup>

|    |             |             |             |
|----|-------------|-------------|-------------|
| C  | -2.10989000 | 1.38421100  | -0.55074100 |
| C  | -1.41063900 | 0.48316800  | -1.57969300 |
| C  | -0.65014400 | -0.68023000 | -0.94219200 |
| C  | -1.99957000 | -0.38858700 | 1.20233700  |
| C  | -2.93683200 | 0.63171900  | 0.51877400  |
| H  | -0.33635700 | -1.43082300 | -1.67213700 |
| H  | -2.16010900 | 0.12370400  | -2.30626400 |
| H  | -0.72154600 | 1.10371000  | -2.17133200 |
| H  | -1.33849200 | 1.94319800  | -0.00514600 |
| H  | -2.52529500 | -1.04799400 | 1.89937300  |
| H  | -1.26589700 | 0.16805700  | 1.80238000  |
| H  | 0.64367700  | -0.23870000 | -0.53795200 |
| C  | -1.19207100 | -1.29138500 | 0.24611600  |
| O  | -0.96017500 | -2.45634100 | 0.62434800  |
| N  | 1.91493300  | 0.07513900  | -0.27262900 |
| Si | 2.90919300  | -1.31680000 | -0.12855400 |
| Si | 2.23284600  | 1.69706700  | 0.14971500  |
| C  | 1.63499900  | 2.92356600  | -1.18638900 |
| H  | 1.83499800  | 3.96424700  | -0.89903900 |
| H  | 2.14674300  | 2.73364600  | -2.13723100 |
| H  | 0.55967700  | 2.83088700  | -1.37152200 |
| C  | 4.08155300  | 2.12135000  | 0.40748500  |
| H  | 4.19625900  | 3.17044900  | 0.71082100  |
| H  | 4.53917300  | 1.50230500  | 1.18779200  |
| H  | 4.66138400  | 1.97623000  | -0.51052500 |
| C  | 1.38497900  | 2.23593900  | 1.77780500  |
| H  | 1.56303300  | 3.29477000  | 2.00851500  |
| H  | 0.30066300  | 2.08300300  | 1.73569200  |

|   |             |             |             |
|---|-------------|-------------|-------------|
| H | 1.76111900  | 1.64147500  | 2.61895500  |
| C | 4.61202900  | -1.14866400 | -0.99167900 |
| H | 4.48433000  | -0.87271600 | -2.04530400 |
| H | 5.24781100  | -0.38763900 | -0.52676800 |
| H | 5.15977500  | -2.10020200 | -0.96166000 |
| C | 3.29684800  | -1.79430600 | 1.68253300  |
| H | 2.36496900  | -1.99490000 | 2.22301100  |
| H | 3.92347800  | -2.69369300 | 1.74864600  |
| H | 3.81903400  | -0.98689000 | 2.21099400  |
| C | 2.08902600  | -2.83580400 | -0.91592600 |
| H | 1.94543400  | -2.69724500 | -1.99446900 |
| H | 2.72026100  | -3.72379700 | -0.77778100 |
| H | 1.10852200  | -3.02881600 | -0.46715000 |
| H | -3.21090700 | 1.38912300  | 1.27094200  |
| H | -2.72123300 | 2.14039900  | -1.05817400 |
| C | -4.31883000 | 0.02441000  | 0.07037200  |
| C | -4.19580300 | -1.30877300 | -0.69812700 |
| H | -3.65132000 | -1.18942300 | -1.63757600 |
| H | -3.67495900 | -2.07080000 | -0.11273700 |
| H | -5.19613700 | -1.69266400 | -0.93905700 |
| C | -5.09180500 | 1.03201300  | -0.80516800 |
| H | -6.11097900 | 0.67233400  | -0.99458700 |
| H | -5.17092800 | 2.01052800  | -0.31530200 |
| H | -4.60980600 | 1.18103900  | -1.77596200 |
| C | -5.16621700 | -0.23399900 | 1.33761800  |
| H | -5.34164300 | 0.69526200  | 1.89347600  |
| H | -6.14427500 | -0.65351900 | 1.07123800  |
| H | -4.67792000 | -0.94131500 | 2.01445600  |

Cartesian coordinates for optimized **TS-3<sub>H4</sub>** (Flipped) with **(Me<sub>3</sub>Si)<sub>2</sub>N<sup>-</sup>**

|    |             |             |             |
|----|-------------|-------------|-------------|
| C  | -2.44579600 | -1.77517500 | 0.24018300  |
| C  | -2.68908300 | -0.29933200 | -0.12406300 |
| C  | -2.36157000 | 0.54105400  | 1.12390000  |
| C  | -0.30420900 | -0.97835600 | 1.42754500  |
| C  | -0.95064300 | -2.01830300 | 0.50137600  |
| H  | -2.22778900 | 1.60050600  | 0.87851000  |
| H  | -1.95185200 | -0.03786500 | -0.89886900 |
| H  | -3.02163200 | -2.02162200 | 1.14418800  |
| H  | 0.75988000  | -0.41218200 | 0.70059800  |
| H  | 0.30141800  | -1.40626800 | 2.23048000  |
| H  | -3.19186300 | 0.50562700  | 1.84307100  |
| C  | -1.10707100 | 0.11269800  | 1.92498200  |
| O  | -0.83743500 | 0.79625300  | 2.92891900  |
| N  | 1.84518300  | -0.00555800 | 0.01558300  |
| Si | 1.85784300  | 1.69123500  | -0.21578000 |
| Si | 3.03661500  | -1.18464100 | -0.29380000 |
| C  | 4.77094600  | -0.79391400 | 0.41952200  |
| H  | 5.46898900  | -1.62650800 | 0.25857800  |
| H  | 5.21341000  | 0.09876200  | -0.03645100 |
| H  | 4.70877000  | -0.61361700 | 1.49913400  |
| C  | 3.32215500  | -1.53709400 | -2.15447100 |
| H  | 4.05479000  | -2.33918400 | -2.31634800 |
| H  | 2.38426900  | -1.83696800 | -2.63674400 |
| H  | 3.68656600  | -0.64535600 | -2.67825200 |
| C  | 2.56478900  | -2.86308400 | 0.47700100  |
| H  | 3.35580700  | -3.60364700 | 0.30186200  |
| H  | 2.42033900  | -2.77733300 | 1.55951400  |
| H  | 1.63624800  | -3.25945900 | 0.05406700  |
| C  | 1.79897700  | 2.64656600  | 1.42775200  |
| H  | 1.65912800  | 3.72551000  | 1.27723900  |
| H  | 0.98380700  | 2.27395000  | 2.05827000  |
| H  | 2.73427900  | 2.50663900  | 1.98404900  |
| C  | 3.38344100  | 2.34964900  | -1.16842400 |
| H  | 3.48708300  | 1.87597000  | -2.15171400 |
| H  | 3.29258300  | 3.43153600  | -1.33251700 |
| H  | 4.31582200  | 2.17999100  | -0.61870500 |
| C  | 0.35857100  | 2.27142700  | -1.24740100 |

|   |             |             |             |
|---|-------------|-------------|-------------|
| H | 0.35125100  | 3.36115600  | -1.38061000 |
| H | 0.36907000  | 1.81031200  | -2.24230400 |
| H | -0.58310300 | 1.99079400  | -0.76460600 |
| H | -0.82629800 | -3.02926000 | 0.91419000  |
| H | -2.79557300 | -2.45106300 | -0.55108200 |
| C | -4.09063500 | 0.00271200  | -0.76037900 |
| H | -0.43872700 | -2.03355800 | -0.47500400 |
| C | -5.24896500 | -0.51147300 | 0.11822000  |
| H | -5.22069400 | -0.07301600 | 1.12102400  |
| H | -6.21626900 | -0.25064000 | -0.32950000 |
| H | -5.21826500 | -1.60019000 | 0.22896300  |
| C | -4.25984900 | 1.52271600  | -0.96718000 |
| H | -3.42269100 | 1.93789000  | -1.54013700 |
| H | -5.18381100 | 1.73654200  | -1.51935800 |
| H | -4.30977300 | 2.06019700  | -0.01601300 |
| C | -4.18659000 | -0.66875300 | -2.14732300 |
| H | -5.14717100 | -0.43822300 | -2.62523400 |
| H | -3.38960400 | -0.31283300 | -2.81025900 |
| H | -4.10440500 | -1.75806000 | -2.08378700 |

Cartesian coordinates for optimized **TS-4<sub>H1</sub>** with **(Me<sub>3</sub>Si)<sub>2</sub>N<sup>+</sup>**

|    |             |             |             |
|----|-------------|-------------|-------------|
| C  | 2.73281400  | -0.61726700 | 0.20411000  |
| C  | 2.13241200  | -1.94067600 | -0.30427100 |
| C  | 1.28406600  | -2.56253800 | 0.81359600  |
| C  | 0.40712500  | -0.16745400 | 1.21790300  |
| C  | 1.60562900  | 0.44870200  | 0.42166300  |
| H  | 0.58140700  | -3.30885800 | 0.42413000  |
| H  | 1.52342800  | -1.77376600 | -1.19885200 |
| H  | 2.91820900  | -2.64400600 | -0.60187000 |
| H  | 3.09246400  | -0.82944300 | 1.22491300  |
| H  | -0.77843900 | -0.10210600 | 0.56278000  |
| H  | 0.12256600  | 0.47697700  | 2.05314500  |
| H  | 1.92938200  | -3.10001200 | 1.52077100  |
| C  | 0.48112300  | -1.55774400 | 1.65974900  |
| O  | -0.13315700 | -1.99566900 | 2.63915200  |
| C  | 4.00287100  | -0.09382500 | -0.54568800 |
| C  | 2.21299400  | 1.65224100  | 1.17072700  |
| H  | 2.49469100  | 1.31187500  | 2.17676800  |
| H  | 1.45024800  | 2.42556300  | 1.29716100  |
| C  | 3.43998900  | 2.23656800  | 0.45689600  |
| H  | 3.87386000  | 3.04459000  | 1.06142300  |
| H  | 3.11686100  | 2.69362200  | -0.48332500 |
| C  | 4.51120400  | 1.16942500  | 0.20022100  |
| H  | 5.35484100  | 1.60078300  | -0.35771500 |
| H  | 4.91977500  | 0.84486600  | 1.16918000  |
| C  | 3.75556600  | 0.21683700  | -2.03670900 |
| H  | 4.70009100  | 0.48811500  | -2.52494900 |
| H  | 3.35508600  | -0.65738900 | -2.56164600 |
| H  | 3.06046000  | 1.04425500  | -2.18912500 |
| C  | 5.12686500  | -1.15048100 | -0.46783300 |
| H  | 6.07197700  | -0.72441400 | -0.82650000 |
| H  | 5.28438600  | -1.48958400 | 0.56286900  |
| H  | 4.91338700  | -2.03070000 | -1.08214200 |
| C  | 0.96220000  | 0.91095000  | -0.88198400 |
| H  | 0.55034400  | 0.09879200  | -1.51167300 |
| O  | 0.81451100  | 2.07286500  | -1.22476800 |
| N  | -2.07185200 | 0.06352000  | -0.01121000 |
| Si | -2.77259800 | -1.37682700 | -0.60279300 |
| Si | -2.79978400 | 1.59376900  | 0.20458800  |
| C  | -4.47223900 | 1.56254300  | 1.14165200  |
| H  | -4.86292000 | 2.57674300  | 1.30043000  |
| H  | -5.24024100 | 0.99609500  | 0.60253300  |
| H  | -4.35091800 | 1.09347000  | 2.12524900  |
| C  | -3.12911900 | 2.52620000  | -1.43201100 |
| H  | -3.54888300 | 3.52675700  | -1.26177000 |
| H  | -2.18783700 | 2.64374200  | -1.98089100 |
| H  | -3.82580700 | 1.97908300  | -2.07789600 |



|   |             |             |             |
|---|-------------|-------------|-------------|
| C | -1.69238400 | 2.76125700  | 1.22517700  |
| H | -2.19677700 | 3.72295500  | 1.38517600  |
| H | -1.45459600 | 2.34315300  | 2.20965800  |
| H | -0.75205800 | 2.96048300  | 0.70189400  |
| C | -3.19080900 | -2.62789100 | 0.77419200  |
| H | -3.48199600 | -3.61038200 | 0.37888100  |
| H | -2.33481300 | -2.76005100 | 1.44487300  |
| H | -4.02258700 | -2.25513900 | 1.38475900  |
| C | -4.38617700 | -1.14412400 | -1.61014900 |
| H | -4.22384400 | -0.49973600 | -2.48191100 |
| H | -4.75238100 | -2.11198200 | -1.97767700 |
| H | -5.18881000 | -0.69620500 | -1.01401000 |
| C | -1.60799800 | -2.28351900 | -1.82059600 |
| H | -2.06237200 | -3.21075900 | -2.19353900 |
| H | -1.38521200 | -1.64950500 | -2.68730300 |
| H | -0.65429300 | -2.55249800 | -1.35540400 |

Cartesian coordinates for optimized TS-4<sub>H2</sub> with (Me<sub>3</sub>Si)<sub>2</sub>N<sup>-</sup>

|    |             |             |             |
|----|-------------|-------------|-------------|
| C  | 2.20733000  | 0.21573600  | 0.56457800  |
| C  | 2.34337400  | -0.37455100 | 1.98466800  |
| C  | 1.01437800  | -0.93941800 | 2.51090700  |
| C  | 0.29404000  | -1.41295100 | 0.11192500  |
| C  | 1.62441100  | -0.83040300 | -0.43856400 |
| H  | 1.15990300  | -1.51890800 | 3.42856900  |
| H  | 3.10457600  | -1.16363100 | 2.00060300  |
| H  | 2.70261800  | 0.39705500  | 2.67551100  |
| H  | 1.42819900  | 0.98901300  | 0.62605400  |
| H  | -0.07581400 | -2.21130000 | -0.53543900 |
| H  | -0.75555100 | -0.52898200 | 0.01556600  |
| H  | 0.34124300  | -0.10948200 | 2.76620000  |
| C  | 0.24358900  | -1.81804000 | 1.51581400  |
| O  | -0.48705300 | -2.71329900 | 1.95670000  |
| C  | 3.48416200  | 0.96686800  | 0.04842600  |
| C  | 1.40313400  | -0.19997700 | -1.82466600 |
| H  | 0.57604000  | 0.51270700  | -1.74781800 |
| H  | 1.08415500  | -0.98376300 | -2.51879600 |
| C  | 2.65675700  | 0.49849000  | -2.36260700 |
| H  | 2.42895900  | 0.99534200  | -3.31500200 |
| H  | 3.42493200  | -0.25136600 | -2.58253800 |
| C  | 3.18509600  | 1.53451200  | -1.36409600 |
| H  | 4.09404000  | 2.01574900  | -1.75349200 |
| H  | 2.43636600  | 2.33309100  | -1.25909800 |
| C  | 4.74067600  | 0.07074300  | 0.00042600  |
| H  | 5.60184300  | 0.65346500  | -0.35009100 |
| H  | 4.99351600  | -0.31849300 | 0.99227900  |
| H  | 4.62814600  | -0.78176200 | -0.67305900 |
| C  | 3.79526200  | 2.16762300  | 0.96827200  |
| H  | 4.58735400  | 2.78684200  | 0.52923900  |
| H  | 2.91249400  | 2.80307200  | 1.10315400  |
| H  | 4.13892300  | 1.85452200  | 1.95921500  |
| C  | 2.47991200  | -2.08180500 | -0.56362100 |
| H  | 2.75334600  | -2.55122000 | 0.40776600  |
| O  | 2.78372200  | -2.64417700 | -1.60449500 |
| N  | -1.95232900 | 0.17902900  | -0.11755900 |
| Si | -3.28369800 | -0.85146300 | -0.45842000 |
| Si | -1.98899900 | 1.85702800  | 0.19889400  |
| C  | -1.11067000 | 2.33619100  | 1.82907600  |
| H  | -1.17938900 | 3.41645200  | 2.01318900  |
| H  | -1.57400900 | 1.82204300  | 2.67932300  |
| H  | -0.04775100 | 2.07260000  | 1.82831200  |
| C  | -3.73399800 | 2.62521300  | 0.38574700  |
| H  | -3.65306200 | 3.70651300  | 0.55847400  |
| H  | -4.35214700 | 2.48162400  | -0.50703100 |
| H  | -4.27659100 | 2.19617700  | 1.23518200  |
| C  | -1.15278400 | 2.91271900  | -1.16024900 |
| H  | -1.20366000 | 3.98505800  | -0.92954200 |
| H  | -0.09595600 | 2.65256800  | -1.28647900 |

|   |             |             |             |
|---|-------------|-------------|-------------|
| H | -1.64213800 | 2.75507600  | -2.12859400 |
| C | -4.55214300 | -0.98572600 | 0.96701900  |
| H | -4.05240700 | -1.33071100 | 1.87934600  |
| H | -5.02986600 | -0.02568900 | 1.19202700  |
| H | -5.34819800 | -1.70413600 | 0.73024600  |
| C | -4.28512500 | -0.32947000 | -2.00712900 |
| H | -3.63196200 | -0.28723900 | -2.88695200 |
| H | -5.08901100 | -1.04574200 | -2.22337200 |
| H | -4.74697400 | 0.65814300  | -1.89512400 |
| C | -2.74050800 | -2.64060500 | -0.79701500 |
| H | -3.62415700 | -3.27064900 | -0.96348400 |
| H | -2.10891200 | -2.71825300 | -1.68956300 |
| H | -2.17974000 | -3.04797700 | 0.05039000  |

Cartesian coordinates for optimized **TS-4<sub>H3</sub>** with **(Me<sub>3</sub>Si)<sub>2</sub>N<sup>-</sup>**

|    |             |             |             |
|----|-------------|-------------|-------------|
| C  | -2.46544500 | 0.25932400  | 0.74070300  |
| C  | -1.11757600 | 0.87473900  | 1.18526300  |
| C  | -0.08812000 | -0.12051600 | 1.74143500  |
| C  | -1.55254600 | -2.07054800 | 0.95723500  |
| C  | -2.25659900 | -1.08770600 | -0.02679400 |
| H  | 1.00374100  | -0.07113300 | 0.89359700  |
| H  | -0.67862700 | 1.42471100  | 0.34053100  |
| H  | -1.33312500 | 1.63804900  | 1.94325500  |
| H  | -2.99552100 | -0.03974300 | 1.66014700  |
| H  | -1.14566000 | -2.93602400 | 0.42034100  |
| H  | -2.31791200 | -2.47516200 | 1.63308500  |
| H  | 0.42083600  | 0.23354600  | 2.64126100  |
| C  | -0.44133000 | -1.51192800 | 1.86720300  |
| O  | 0.12434300  | -2.32828800 | 2.61311200  |
| C  | -3.42709500 | 1.27620700  | 0.02748200  |
| C  | -3.59814400 | -1.70084300 | -0.47811200 |
| H  | -4.12589500 | -2.05714700 | 0.41761500  |
| H  | -3.39685100 | -2.57622400 | -1.10429000 |
| C  | -4.50295600 | -0.71236900 | -1.21800600 |
| H  | -5.46642400 | -1.18792000 | -1.44611700 |
| H  | -4.05084400 | -0.45277600 | -2.18077600 |
| C  | -4.73325300 | 0.54171600  | -0.36954900 |
| H  | -5.39418000 | 1.24614800  | -0.89429000 |
| H  | -5.26225500 | 0.25071000  | 0.55081700  |
| C  | -2.80837700 | 1.93323200  | -1.22672100 |
| H  | -3.54631000 | 2.59119800  | -1.70280400 |
| H  | -1.93947000 | 2.54662800  | -0.97357600 |
| H  | -2.48951300 | 1.20530600  | -1.97603100 |
| C  | -3.80827100 | 2.40273100  | 1.01125100  |
| H  | -4.56976100 | 3.05636400  | 0.56761600  |
| H  | -4.22107200 | 1.99411700  | 1.94141000  |
| H  | -2.94910400 | 3.02732100  | 1.27177800  |
| C  | -1.31242400 | -0.93877500 | -1.21693700 |
| H  | -0.33789300 | -0.46001800 | -0.99968700 |
| O  | -1.55001600 | -1.36392000 | -2.33585600 |
| N  | 2.09359900  | 0.16135900  | 0.10252800  |
| Si | 2.96741300  | -1.23121600 | -0.39100700 |
| Si | 2.58301800  | 1.79571500  | -0.01291900 |
| C  | 1.92346400  | 2.67290900  | -1.57915000 |
| H  | 2.20193600  | 3.73458600  | -1.61106300 |
| H  | 2.31605600  | 2.19657500  | -2.48524900 |
| H  | 0.82995000  | 2.61268500  | -1.63240400 |
| C  | 4.47678300  | 2.08137300  | -0.03510300 |
| H  | 4.70741800  | 3.15255800  | -0.10630000 |
| H  | 4.94052200  | 1.70276100  | 0.88301400  |
| H  | 4.96694000  | 1.58397600  | -0.87935800 |
| C  | 1.97096800  | 2.83098600  | 1.46948200  |
| H  | 2.32535100  | 3.86703400  | 1.39158900  |
| H  | 0.87905400  | 2.85912700  | 1.53670900  |
| H  | 2.34652200  | 2.41938300  | 2.41321000  |
| C  | 3.68197600  | -1.08850800 | -2.16208800 |
| H  | 2.87736500  | -0.91837200 | -2.88704100 |

|   |            |             |             |
|---|------------|-------------|-------------|
| H | 4.39362500 | -0.26075600 | -2.26147300 |
| H | 4.20498900 | -2.00821200 | -2.45579000 |
| C | 4.44604100 | -1.65363700 | 0.74492500  |
| H | 4.09715800 | -1.80926900 | 1.77217600  |
| H | 4.96065500 | -2.56892500 | 0.42371400  |
| H | 5.18608600 | -0.84541900 | 0.76595200  |
| C | 1.88108700 | -2.79038600 | -0.41287500 |
| H | 2.48512300 | -3.66119400 | -0.69950500 |
| H | 1.44540600 | -2.99094200 | 0.57106400  |
| H | 1.06672300 | -2.70638000 | -1.14178000 |

Cartesian coordinates for optimized **TS-4<sub>H4</sub>** with **(Me<sub>3</sub>Si)<sub>2</sub>N<sup>-</sup>**

|    |             |             |             |
|----|-------------|-------------|-------------|
| C  | -1.92663700 | 0.42595100  | 0.16944200  |
| C  | -0.98422000 | 0.87276500  | -0.96728900 |
| C  | -0.05333500 | -0.23782400 | -1.45960800 |
| C  | -1.69537900 | -1.97621400 | -0.55303500 |
| C  | -2.73218000 | -0.86043600 | -0.22674400 |
| H  | 0.46788500  | 0.01852400  | -2.38775300 |
| H  | -1.57947700 | 1.29677900  | -1.79241700 |
| H  | -0.37291200 | 1.70212400  | -0.59716100 |
| H  | -1.27593900 | 0.09003200  | 0.99180100  |
| H  | -2.18784900 | -2.86021400 | -0.97404700 |
| H  | -1.24612300 | -2.29592700 | 0.39560800  |
| H  | 1.08792400  | -0.19574500 | -0.63610400 |
| C  | -0.54351500 | -1.59552400 | -1.50879400 |
| O  | -0.04021400 | -2.51485300 | -2.17487900 |
| C  | -2.79903800 | 1.57846100  | 0.78142000  |
| C  | -3.65544800 | -1.32344600 | 0.91677200  |
| H  | -3.02034600 | -1.70612400 | 1.72746600  |
| H  | -4.26954200 | -2.16062100 | 0.56735900  |
| C  | -4.54333900 | -0.20423700 | 1.46842000  |
| H  | -5.12382100 | -0.57664700 | 2.32321400  |
| H  | -5.27107000 | 0.09225400  | 0.70589200  |
| C  | -3.69398700 | 0.99330900  | 1.90445200  |
| H  | -4.33460100 | 1.79238300  | 2.30373900  |
| H  | -3.04327100 | 0.67802100  | 2.73365900  |
| C  | -3.67964300 | 2.29903300  | -0.26324000 |
| H  | -4.27042600 | 3.08433400  | 0.22506400  |
| H  | -3.06968300 | 2.77977100  | -1.03362100 |
| H  | -4.38152200 | 1.62921400  | -0.76574900 |
| C  | -1.87894200 | 2.63372700  | 1.43209900  |
| H  | -2.47680100 | 3.36987000  | 1.98422000  |
| H  | -1.18094300 | 2.17008600  | 2.13800700  |
| H  | -1.28749000 | 3.17806400  | 0.69091700  |
| C  | -3.52394900 | -0.68491100 | -1.51283100 |
| H  | -2.91834000 | -0.37438000 | -2.38998400 |
| O  | -4.71128600 | -0.92100400 | -1.65249100 |
| N  | 2.23626500  | 0.03898200  | 0.02242800  |
| Si | 3.20670600  | 1.27425000  | -0.65658000 |
| Si | 2.75477900  | -1.18682700 | 1.09998300  |
| C  | 3.04167700  | -0.56436900 | 2.88721700  |
| H  | 3.31613700  | -1.38416200 | 3.56451400  |
| H  | 3.83885300  | 0.18609200  | 2.93395100  |
| H  | 2.13102200  | -0.09698600 | 3.28053500  |
| C  | 4.38510100  | -2.04945600 | 0.58818200  |
| H  | 4.66971400  | -2.83453800 | 1.30111300  |
| H  | 4.27658600  | -2.51589100 | -0.39765400 |
| H  | 5.22168100  | -1.34306500 | 0.52616800  |
| C  | 1.46411500  | -2.57470200 | 1.24534500  |
| H  | 1.86049000  | -3.40956900 | 1.83710000  |
| H  | 0.55722700  | -2.22068900 | 1.74927500  |
| H  | 1.17718600  | -2.95782400 | 0.26080200  |
| C  | 4.50584000  | 1.99593700  | 0.54937900  |
| H  | 4.02556400  | 2.41213900  | 1.44239900  |
| H  | 5.22207000  | 1.23756400  | 0.88609500  |
| H  | 5.08095900  | 2.80119800  | 0.07358100  |
| C  | 4.18463000  | 0.72264600  | -2.20331300 |

|   |            |             |             |
|---|------------|-------------|-------------|
| H | 3.50398300 | 0.33003500  | -2.96753100 |
| H | 4.75684600 | 1.54570700  | -2.65178400 |
| H | 4.88886800 | -0.08026800 | -1.95672400 |
| C | 2.17013900 | 2.77313100  | -1.21948000 |
| H | 2.81468600 | 3.55467800  | -1.64218400 |
| H | 1.43849100 | 2.49760900  | -1.98611000 |
| H | 1.62000600 | 3.21316800  | -0.37970200 |

Cartesian coordinates for optimized **TS-5<sub>H1</sub>** with **(Me<sub>3</sub>Si)<sub>2</sub>N<sup>-</sup>**

|    |             |             |             |
|----|-------------|-------------|-------------|
| C  | -2.77402300 | -0.52814500 | -0.24969800 |
| C  | -2.22889900 | -1.86456100 | 0.28036600  |
| C  | -1.31917600 | -2.49433500 | -0.78557200 |
| C  | -0.40086700 | -0.10557700 | -1.16244900 |
| C  | -1.58174500 | 0.49059300  | -0.33402800 |
| H  | -0.61075000 | -3.20440900 | -0.34257300 |
| H  | -1.67176700 | -1.68730900 | 1.20782000  |
| H  | -3.03870200 | -2.55763100 | 0.53436400  |
| H  | -3.03746700 | -0.68825000 | -1.30717300 |
| H  | 0.79027500  | -0.04613600 | -0.54332800 |
| H  | -0.15394800 | 0.54284800  | -2.00704100 |
| H  | -1.91446200 | -3.07149800 | -1.50423100 |
| C  | -0.51322900 | -1.48752900 | -1.62694500 |
| O  | 0.07015000  | -1.91423800 | -2.62911100 |
| C  | -4.09721800 | -0.00858400 | 0.40778200  |
| C  | -2.09725800 | 1.80275700  | -0.98670600 |
| H  | -2.35978600 | 1.55767000  | -2.02425900 |
| H  | -1.28354400 | 2.53242800  | -1.02916000 |
| C  | -3.31840600 | 2.37766200  | -0.26244100 |
| H  | -3.65455300 | 3.29206800  | -0.76818200 |
| H  | -3.03511500 | 2.67454200  | 0.75467000  |
| C  | -4.46508500 | 1.36026900  | -0.22645000 |
| H  | -5.33218800 | 1.77772800  | 0.30391700  |
| H  | -4.79539800 | 1.18147900  | -1.26062400 |
| C  | -4.03542800 | 0.10755300  | 1.94573500  |
| H  | -5.02335000 | 0.38622800  | 2.33386800  |
| H  | -3.76091200 | -0.84918300 | 2.40188800  |
| H  | -3.31383700 | 0.84814000  | 2.29004000  |
| C  | -5.24071300 | -0.98920600 | 0.06233500  |
| H  | -6.20296000 | -0.58036600 | 0.39402300  |
| H  | -5.30634900 | -1.16250900 | -1.01826900 |
| H  | -5.11335900 | -1.95997200 | 0.55118600  |
| N  | 2.11536200  | 0.08286900  | -0.03253900 |
| Si | 2.76607800  | -1.37326700 | 0.57581500  |
| Si | 2.86825500  | 1.59536500  | -0.23406000 |
| C  | 4.38234400  | 1.58004500  | -1.40953200 |
| H  | 4.81718800  | 2.58059200  | -1.53772600 |
| H  | 5.17548500  | 0.92175100  | -1.03499700 |
| H  | 4.09440800  | 1.20846100  | -2.40001400 |
| C  | 3.48028100  | 2.41387900  | 1.38355600  |
| H  | 3.86542800  | 3.42752200  | 1.20765500  |
| H  | 2.65542000  | 2.48479100  | 2.10169900  |
| H  | 4.28023700  | 1.83399300  | 1.85730300  |
| C  | 1.66852100  | 2.87400200  | -0.98965800 |
| H  | 2.17724600  | 3.83195200  | -1.15664900 |
| H  | 1.26395100  | 2.54029300  | -1.95144900 |
| H  | 0.82679600  | 3.06043200  | -0.31347200 |
| C  | 3.08631100  | -2.67339200 | -0.78407900 |
| H  | 3.33794700  | -3.65972100 | -0.37119900 |
| H  | 2.21162200  | -2.77964600 | -1.43466400 |
| H  | 3.92187700  | -2.35712900 | -1.42108400 |
| C  | 4.43138200  | -1.18714300 | 1.50605400  |
| H  | 4.32401100  | -0.56008200 | 2.39828200  |
| H  | 4.80173500  | -2.16795900 | 1.83266300  |
| H  | 5.20837200  | -0.73716800 | 0.87712800  |
| C  | 1.59918300  | -2.18725600 | 1.85077600  |
| H  | 2.03320200  | -3.10299600 | 2.27349800  |
| H  | 1.39254300  | -1.49377500 | 2.67338800  |

|   |             |             |            |
|---|-------------|-------------|------------|
| H | 0.63484700  | -2.45609500 | 1.40696500 |
| C | -1.10412800 | 0.84206500  | 1.02666400 |
| N | -0.75494500 | 1.16068500  | 2.08965500 |

Cartesian coordinates for optimized **TS-5<sub>H2</sub>** with **(Me<sub>3</sub>Si)<sub>2</sub>N<sup>+</sup>**

|    |             |             |             |
|----|-------------|-------------|-------------|
| C  | 2.21823100  | 0.11944400  | 0.51550800  |
| C  | 2.39530200  | -0.66248900 | 1.83080500  |
| C  | 1.06384400  | -1.23939400 | 2.33489000  |
| C  | 0.28940500  | -1.43404500 | -0.09243500 |
| C  | 1.63569200  | -0.84212600 | -0.57359300 |
| H  | 1.21849100  | -1.94115300 | 3.16090400  |
| H  | 3.10705400  | -1.48167000 | 1.66946300  |
| H  | 2.83284800  | -0.02070500 | 2.60455400  |
| H  | 1.40779300  | 0.84490200  | 0.67232600  |
| H  | -0.08534700 | -2.16617300 | -0.81051500 |
| H  | -0.76967100 | -0.51339300 | -0.12727900 |
| H  | 0.43470800  | -0.42799000 | 2.72705100  |
| C  | 0.22477800  | -1.95753400 | 1.26598500  |
| O  | -0.56358400 | -2.83856200 | 1.63148400  |
| C  | 3.46262300  | 0.97222500  | 0.08336700  |
| C  | 1.44163300  | -0.09850900 | -1.92025400 |
| H  | 0.62305800  | 0.61396300  | -1.77980600 |
| H  | 1.10315300  | -0.81499200 | -2.67725200 |
| C  | 2.71099100  | 0.62451700  | -2.37737600 |
| H  | 2.51631200  | 1.16527700  | -3.31240600 |
| H  | 3.49703300  | -0.10772700 | -2.60263000 |
| C  | 3.18907000  | 1.61037700  | -1.30501200 |
| H  | 4.09806100  | 2.12965400  | -1.63965400 |
| H  | 2.42025600  | 2.38636400  | -1.18508100 |
| C  | 4.78054100  | 0.16801500  | 0.04300500  |
| H  | 5.60773300  | 0.83055900  | -0.24134200 |
| H  | 5.02032100  | -0.25101700 | 1.02540600  |
| H  | 4.75297200  | -0.66111200 | -0.66541900 |
| C  | 3.65130600  | 2.13140500  | 1.08700800  |
| H  | 4.44429300  | 2.80646400  | 0.74227600  |
| H  | 2.73345000  | 2.72080100  | 1.19186900  |
| H  | 3.93713100  | 1.77408400  | 2.08126800  |
| N  | -1.93327600 | 0.20294200  | -0.21679400 |
| Si | -3.29258800 | -0.81403400 | -0.49525800 |
| Si | -1.94679500 | 1.83393800  | 0.29221800  |
| C  | -0.89275500 | 2.97861400  | -0.81993200 |
| H  | -0.94983800 | 4.02307000  | -0.48652300 |
| H  | 0.16445900  | 2.69243700  | -0.81777400 |
| H  | -1.23907900 | 2.93948400  | -1.85931500 |
| C  | -1.26307100 | 2.08146900  | 2.06143900  |
| H  | -1.29572900 | 3.13592700  | 2.36588700  |
| H  | -1.85088000 | 1.50450000  | 2.78481700  |
| H  | -0.22325700 | 1.74725100  | 2.14999700  |
| C  | -3.66583400 | 2.67556700  | 0.32065400  |
| H  | -3.58118700 | 3.69098500  | 0.72948400  |
| H  | -4.09284600 | 2.76071200  | -0.68443700 |
| H  | -4.38599700 | 2.13045200  | 0.94048900  |
| C  | -4.35373700 | -1.12744000 | 1.06357600  |
| H  | -3.73484100 | -1.59392700 | 1.83825600  |
| H  | -4.76614400 | -0.20055300 | 1.47954800  |
| H  | -5.19580800 | -1.80095100 | 0.85622300  |
| C  | -4.49089100 | -0.14960000 | -1.83410500 |
| H  | -3.95260700 | 0.04230500  | -2.77005500 |
| H  | -5.28149700 | -0.88070900 | -2.04938500 |
| H  | -4.97937300 | 0.78470000  | -1.53762800 |
| C  | -2.77928500 | -2.54039600 | -1.09892500 |
| H  | -3.67301700 | -3.14862200 | -1.29047200 |
| H  | -2.20258800 | -2.49907900 | -2.03037500 |
| H  | -2.17250400 | -3.04757300 | -0.34225100 |
| C  | 2.56605900  | -1.97281500 | -0.82592600 |
| N  | 3.25752000  | -2.88300100 | -1.05057900 |

Cartesian coordinates for optimized **TS-5<sub>H3</sub>** with **(Me<sub>3</sub>Si)<sub>2</sub>N<sup>-</sup>**

|    |             |             |             |
|----|-------------|-------------|-------------|
| C  | -2.50817500 | 0.32863200  | 0.59627000  |
| C  | -1.06955800 | 0.87469200  | 0.69034100  |
| C  | -0.10743800 | -0.02268100 | 1.48308700  |
| C  | -1.61406000 | -2.03401600 | 0.89595500  |
| C  | -2.47274300 | -1.10924900 | -0.02306100 |
| H  | 1.06141300  | -0.04591700 | 0.79081800  |
| H  | -0.68611800 | 1.03048100  | -0.32838400 |
| H  | -1.09655200 | 1.86812900  | 1.15078400  |
| H  | -2.85881300 | 0.15442200  | 1.62600300  |
| H  | -1.16116300 | -2.84143700 | 0.31073400  |
| H  | -2.28394100 | -2.51946400 | 1.61509400  |
| H  | 0.28562400  | 0.44157800  | 2.39096400  |
| C  | -0.50508400 | -1.38378700 | 1.75472000  |
| O  | 0.00410300  | -2.12030500 | 2.61283500  |
| C  | -3.55333600 | 1.31202000  | -0.04095900 |
| C  | -3.90738000 | -1.69382900 | -0.15086100 |
| H  | -4.27877400 | -1.85498300 | 0.86977900  |
| H  | -3.85921900 | -2.67803700 | -0.63116000 |
| C  | -4.86304700 | -0.75622100 | -0.88963700 |
| H  | -5.86478800 | -1.20301300 | -0.93121600 |
| H  | -4.53539900 | -0.63364700 | -1.92907000 |
| C  | -4.92483500 | 0.59901700  | -0.17785200 |
| H  | -5.62519800 | 1.27059800  | -0.69294100 |
| H  | -5.33736500 | 0.43901100  | 0.82962500  |
| C  | -3.11632400 | 1.87333600  | -1.41215000 |
| H  | -3.88388000 | 2.56014700  | -1.79068500 |
| H  | -2.18216900 | 2.43537100  | -1.32979600 |
| H  | -2.96022200 | 1.09711700  | -2.16305100 |
| C  | -3.75898000 | 2.50999500  | 0.91190200  |
| H  | -4.56283400 | 3.15748800  | 0.54049600  |
| H  | -4.03765000 | 2.17545100  | 1.91815800  |
| H  | -2.85758900 | 3.12259500  | 0.99999700  |
| N  | 2.27051200  | 0.12846800  | 0.13634500  |
| Si | 3.03151200  | -1.30661600 | -0.39731400 |
| Si | 2.83859900  | 1.73194700  | 0.05251200  |
| C  | 2.37307900  | 2.63606000  | -1.56846700 |
| H  | 2.70738700  | 3.68227200  | -1.57632200 |
| H  | 2.81981000  | 2.13506600  | -2.43532300 |
| H  | 1.28699900  | 2.62943700  | -1.71864300 |
| C  | 4.73874000  | 1.92060900  | 0.20605000  |
| H  | 5.04070800  | 2.97520100  | 0.15465800  |
| H  | 5.09497500  | 1.51739200  | 1.16104900  |
| H  | 5.26950100  | 1.38808600  | -0.59171100 |
| C  | 2.12643100  | 2.80502900  | 1.46305900  |
| H  | 2.52170600  | 3.82803400  | 1.41607100  |
| H  | 1.03425800  | 2.87147400  | 1.41715900  |
| H  | 2.38834800  | 2.38875300  | 2.44238900  |
| C  | 3.75900800  | -1.18085900 | -2.16480600 |
| H  | 2.97044000  | -0.93374300 | -2.88495700 |
| H  | 4.52828500  | -0.40266000 | -2.24005400 |
| H  | 4.21728400  | -2.12709500 | -2.48208600 |
| C  | 4.47877900  | -1.87182800 | 0.71942400  |
| H  | 4.12559000  | -2.02278900 | 1.74598700  |
| H  | 4.92076800  | -2.81611200 | 0.37411200  |
| H  | 5.27838200  | -1.12253600 | 0.75318000  |
| C  | 1.81615900  | -2.76739500 | -0.44365600 |
| H  | 2.32166300  | -3.67808000 | -0.79031700 |
| H  | 1.40076600  | -2.96745800 | 0.54936600  |
| H  | 0.98655200  | -2.56554300 | -1.13071100 |
| C  | -1.88579200 | -1.11044600 | -1.37939700 |
| N  | -1.47563000 | -1.17450400 | -2.46566300 |

Cartesian coordinates for optimized **TS-5<sub>H4</sub>** with **(Me<sub>3</sub>Si)<sub>2</sub>N<sup>-</sup>**

|   |             |            |             |
|---|-------------|------------|-------------|
| C | -1.94223600 | 0.37409900 | 0.13793000  |
| C | -1.08602000 | 0.82225200 | -1.05986400 |

|    |             |             |             |
|----|-------------|-------------|-------------|
| C  | -0.11264100 | -0.26391700 | -1.52245900 |
| C  | -1.74208400 | -2.02905000 | -0.63622800 |
| C  | -2.74938900 | -0.91104300 | -0.25048600 |
| H  | 0.41820200  | -0.00347200 | -2.44372700 |
| H  | -1.75608300 | 1.14418900  | -1.87312300 |
| H  | -0.51477500 | 1.71015600  | -0.77088100 |
| H  | -1.24378100 | 0.01669500  | 0.90926300  |
| H  | -2.25993600 | -2.87220200 | -1.10388500 |
| H  | -1.29996700 | -2.40758900 | 0.29350700  |
| H  | 1.01590800  | -0.19705300 | -0.66728100 |
| C  | -0.57620500 | -1.62910400 | -1.56955600 |
| O  | -0.04192900 | -2.55167000 | -2.20533800 |
| C  | -2.77720900 | 1.51270600  | 0.82329400  |
| C  | -3.64178500 | -1.39219300 | 0.92557600  |
| H  | -2.96600700 | -1.74871200 | 1.71393200  |
| H  | -4.23799900 | -2.25444900 | 0.60451200  |
| C  | -4.52723200 | -0.27922400 | 1.48781800  |
| H  | -5.11275300 | -0.66126300 | 2.33408100  |
| H  | -5.25262500 | 0.03876600  | 0.72871000  |
| C  | -3.66496000 | 0.90354500  | 1.94060200  |
| H  | -4.29616400 | 1.69597600  | 2.36551700  |
| H  | -3.01149900 | 0.56051600  | 2.75620700  |
| C  | -3.65583200 | 2.31235300  | -0.16379600 |
| H  | -4.19958300 | 3.09685500  | 0.37769800  |
| H  | -3.04465300 | 2.80193500  | -0.92710600 |
| H  | -4.38915100 | 1.69338700  | -0.68392700 |
| C  | -1.80927400 | 2.50551000  | 1.50315600  |
| H  | -2.37221100 | 3.24385200  | 2.08792500  |
| H  | -1.12193900 | 1.98971800  | 2.18271700  |
| H  | -1.20508100 | 3.05227600  | 0.77438500  |
| N  | 2.13840700  | 0.04778000  | 0.01735000  |
| Si | 3.10361200  | 1.30282600  | -0.63499100 |
| Si | 2.66241300  | -1.18430500 | 1.08576700  |
| C  | 2.93477400  | -0.57612800 | 2.88031600  |
| H  | 3.21091600  | -1.40068000 | 3.55112500  |
| H  | 3.72641600  | 0.17918800  | 2.93926100  |
| H  | 2.01876000  | -0.11873600 | 3.27308300  |
| C  | 4.30119900  | -2.02992100 | 0.57429300  |
| H  | 4.58786400  | -2.82034700 | 1.28044600  |
| H  | 4.20097700  | -2.48658600 | -0.41692900 |
| H  | 5.13279500  | -1.31676500 | 0.52408100  |
| C  | 1.38249900  | -2.58416400 | 1.21416900  |
| H  | 1.78063200  | -3.41582300 | 1.80922100  |
| H  | 0.46691000  | -2.23957400 | 1.70924000  |
| H  | 1.11109700  | -2.96814500 | 0.22560400  |
| C  | 4.38330700  | 2.01879900  | 0.59465100  |
| H  | 3.89078200  | 2.41697900  | 1.48919000  |
| H  | 5.10439500  | 1.26295000  | 0.92659900  |
| H  | 4.95434200  | 2.83673400  | 0.13593900  |
| C  | 4.10154300  | 0.78182800  | -2.17887500 |
| H  | 3.43232000  | 0.39248400  | -2.95468900 |
| H  | 4.66913800  | 1.61679500  | -2.61080100 |
| H  | 4.81188400  | -0.01686100 | -1.93617100 |
| C  | 2.05673400  | 2.79839700  | -1.18569900 |
| H  | 2.69741000  | 3.59813900  | -1.57911200 |
| H  | 1.34458900  | 2.52888000  | -1.97253100 |
| H  | 1.48440600  | 3.21206700  | -0.34730800 |
| C  | -3.63503900 | -0.67225400 | -1.41074000 |
| N  | -4.36774300 | -0.53080200 | -2.30271400 |

Cartesian coordinates for optimized TS-6<sub>H1</sub> with (Me<sub>3</sub>Si)<sub>2</sub>N<sup>-</sup>

|   |            |             |             |
|---|------------|-------------|-------------|
| C | 2.73036200 | -0.62068400 | 0.28104800  |
| C | 2.21330100 | -2.00016700 | -0.16597800 |
| C | 1.33524100 | -2.58926500 | 0.94700200  |
| C | 0.36259500 | -0.19240500 | 1.22428200  |
| C | 1.56753000 | 0.40340500  | 0.47276900  |
| H | 0.68542700 | -3.38680600 | 0.56901900  |
| H | 1.64896900 | -1.90700200 | -1.09316700 |

|    |             |             |             |
|----|-------------|-------------|-------------|
| H  | 3.05118700  | -2.67851500 | -0.35886600 |
| H  | 3.06415200  | -0.76361000 | 1.32222900  |
| H  | -0.76160500 | -0.12085400 | 0.57338300  |
| H  | 0.07673200  | 0.44940400  | 2.06113300  |
| H  | 1.96110500  | -3.05656300 | 1.71954700  |
| C  | 0.44771800  | -1.58340600 | 1.69633100  |
| O  | -0.20914200 | -1.99510800 | 2.65424500  |
| C  | 4.01322800  | -0.06910900 | -0.43370500 |
| C  | 2.11935800  | 1.64936000  | 1.18955400  |
| H  | 2.37696700  | 1.31555400  | 2.20289600  |
| H  | 1.32935200  | 2.39482200  | 1.29235800  |
| C  | 3.35920700  | 2.25369300  | 0.51825700  |
| H  | 3.74102200  | 3.07889700  | 1.13332000  |
| H  | 3.06973700  | 2.69467000  | -0.44030600 |
| C  | 4.46512500  | 1.21044700  | 0.32118700  |
| H  | 5.31843700  | 1.65674300  | -0.20830900 |
| H  | 4.84200400  | 0.90704600  | 1.30949700  |
| C  | 3.83814200  | 0.22893400  | -1.93828700 |
| H  | 4.81604300  | 0.45934100  | -2.37953900 |
| H  | 3.42310200  | -0.63153700 | -2.47010200 |
| H  | 3.18425000  | 1.07979800  | -2.13586200 |
| C  | 5.15390200  | -1.10204600 | -0.29635700 |
| H  | 6.10642600  | -0.65040200 | -0.59877500 |
| H  | 5.26205100  | -1.44572000 | 0.73932900  |
| H  | 4.99485900  | -1.98076400 | -0.92817500 |
| N  | -2.11958500 | 0.05719100  | 0.01524700  |
| Si | -2.82798200 | -1.36950300 | -0.59296500 |
| Si | -2.86070900 | 1.56726500  | 0.27572000  |
| C  | -4.54942600 | 1.49129900  | 1.18351300  |
| H  | -4.96291000 | 2.49442400  | 1.35498500  |
| H  | -5.29584900 | 0.92104000  | 0.61818600  |
| H  | -4.43842100 | 1.00361900  | 2.15931600  |
| C  | -3.17525600 | 2.56899400  | -1.32344200 |
| H  | -3.59445800 | 3.56344400  | -1.11818500 |
| H  | -2.23165900 | 2.70322800  | -1.86446600 |
| H  | -3.86811700 | 2.04727100  | -1.99391800 |
| C  | -1.78496200 | 2.71036900  | 1.36225100  |
| H  | -2.29884000 | 3.66259800  | 1.54647600  |
| H  | -1.56291300 | 2.25938800  | 2.33614200  |
| H  | -0.83648500 | 2.93565000  | 0.86439200  |
| C  | -3.45270100 | -2.54148700 | 0.78076100  |
| H  | -3.79196800 | -3.51086900 | 0.39099900  |
| H  | -2.65333400 | -2.72158500 | 1.50835000  |
| H  | -4.29045800 | -2.08873200 | 1.32535200  |
| C  | -4.32067400 | -1.08968200 | -1.76457900 |
| H  | -4.02416200 | -0.50498200 | -2.64325200 |
| H  | -4.72239000 | -2.04711800 | -2.12241000 |
| H  | -5.14115500 | -0.55316600 | -1.27447000 |
| C  | -1.60385500 | -2.39333500 | -1.64017800 |
| H  | -2.09352300 | -3.27896800 | -2.06638800 |
| H  | -1.20275500 | -1.79147700 | -2.46204900 |
| H  | -0.75160800 | -2.74255900 | -1.04887500 |
| N  | 1.00594300  | 0.87718300  | -0.91672900 |
| O  | 0.78123600  | 0.03354500  | -1.77802700 |
| O  | 0.76477500  | 2.07600300  | -1.07053800 |

Cartesian coordinates for optimized TS-6<sub>H2</sub> with (Me<sub>3</sub>Si)<sub>2</sub>N<sup>-</sup>

|   |             |             |             |
|---|-------------|-------------|-------------|
| C | 2.08350300  | 0.40377000  | 0.56537300  |
| C | 2.24742500  | -0.14805600 | 1.99644800  |
| C | 0.97381400  | -0.84210000 | 2.50616100  |
| C | 0.25967100  | -1.31948200 | 0.10714600  |
| C | 1.50713900  | -0.64261400 | -0.43382500 |
| H | 1.17446000  | -1.42516500 | 3.41030200  |
| H | 3.08000600  | -0.85212200 | 2.03258100  |
| H | 2.49308800  | 0.67935900  | 2.67214800  |
| H | 1.25824400  | 1.12870800  | 0.61413700  |
| H | -0.06131200 | -2.12359100 | -0.55817600 |
| H | -0.85112300 | -0.49133700 | 0.03509700  |



|    |             |             |             |
|----|-------------|-------------|-------------|
| H  | 0.22762500  | -0.08255300 | 2.77955800  |
| C  | 0.27156100  | -1.76097200 | 1.50120400  |
| O  | -0.37786000 | -2.72386700 | 1.91976100  |
| C  | 3.30310900  | 1.23542000  | 0.03128600  |
| C  | 1.24002400  | -0.00278100 | -1.80422400 |
| H  | 0.36955200  | 0.64488700  | -1.66164500 |
| H  | 0.93706800  | -0.78007100 | -2.50938400 |
| C  | 2.41297400  | 0.81026400  | -2.36293500 |
| H  | 2.09368400  | 1.32826300  | -3.27650000 |
| H  | 3.22044200  | 0.13307600  | -2.65830400 |
| C  | 2.91842200  | 1.83869500  | -1.34501300 |
| H  | 3.78361700  | 2.38207900  | -1.75065200 |
| H  | 2.13266500  | 2.59041500  | -1.18151100 |
| C  | 4.61050600  | 0.42236100  | -0.09422100 |
| H  | 5.43315000  | 1.09374200  | -0.37064800 |
| H  | 4.87791900  | -0.05718000 | 0.85162900  |
| H  | 4.55919000  | -0.35784900 | -0.85579900 |
| C  | 3.57683900  | 2.41665900  | 0.98797300  |
| H  | 4.29732000  | 3.10827300  | 0.53447700  |
| H  | 2.66079500  | 2.98073400  | 1.19854400  |
| H  | 3.99692400  | 2.08702500  | 1.94290200  |
| N  | -2.06729800 | 0.14895800  | -0.08824400 |
| Si | -3.33631700 | -0.94264000 | -0.48041500 |
| Si | -2.21033800 | 1.81655900  | 0.25734500  |
| C  | -1.50600200 | 2.94684400  | -1.11759500 |
| H  | -1.62047400 | 4.00991500  | -0.86802300 |
| H  | -0.43947300 | 2.76395300  | -1.29205600 |
| H  | -2.02360500 | 2.76873400  | -2.06756600 |
| C  | -1.30399900 | 2.33295100  | 1.85944400  |
| H  | -1.43974400 | 3.40376800  | 2.06023100  |
| H  | -1.70003600 | 1.77931000  | 2.71873100  |
| H  | -0.22622700 | 2.14333300  | 1.81936200  |
| C  | -3.99670200 | 2.45118100  | 0.52621700  |
| H  | -3.99178300 | 3.53681100  | 0.68969200  |
| H  | -4.64734400 | 2.25199600  | -0.33218100 |
| H  | -4.45869500 | 1.98787000  | 1.40474200  |
| C  | -4.63501500 | -1.16486800 | 0.90535500  |
| H  | -4.14495600 | -1.49242100 | 1.82929200  |
| H  | -5.17479500 | -0.23752800 | 1.12575700  |
| H  | -5.37973800 | -1.92528000 | 0.63541100  |
| C  | -4.31824700 | -0.44209900 | -2.04799700 |
| H  | -3.64602300 | -0.36515700 | -2.91096800 |
| H  | -5.09009800 | -1.18393600 | -2.29244000 |
| H  | -4.81803600 | 0.52712700  | -1.93657000 |
| C  | -2.69147100 | -2.69575800 | -0.82901300 |
| H  | -3.53790300 | -3.37133700 | -1.00909300 |
| H  | -2.04965900 | -2.73164500 | -1.71696000 |
| H  | -2.11563600 | -3.08224500 | 0.01821900  |
| N  | 2.54602900  | -1.81807700 | -0.65821100 |
| O  | 3.00496600  | -2.39160200 | 0.33074000  |
| O  | 2.79810100  | -2.17921600 | -1.81136200 |

Cartesian coordinates for optimized TS-6<sub>H3</sub> with (Me<sub>3</sub>Si)<sub>2</sub>N<sup>-</sup>

|   |             |             |             |
|---|-------------|-------------|-------------|
| C | -2.34838400 | 0.52830500  | 0.60482700  |
| C | -0.88402700 | 1.01295500  | 0.59506200  |
| C | 0.04873800  | 0.14086500  | 1.44780200  |
| C | -1.49547200 | -1.86709800 | 0.96630700  |
| C | -2.50415300 | -0.96852600 | 0.19054800  |
| H | 1.22688000  | 0.03102600  | 0.77400700  |
| H | -0.51871300 | 1.08023200  | -0.43493900 |
| H | -0.86806700 | 2.03218200  | 0.99394900  |
| H | -2.62859000 | 0.48615600  | 1.66980400  |
| H | -0.97994200 | -2.53999000 | 0.27376400  |
| H | -2.04950400 | -2.51072300 | 1.65599900  |
| H | 0.45098800  | 0.65475400  | 2.32491500  |
| C | -0.40274800 | -1.17813000 | 1.81819100  |
| O | 0.06715700  | -1.86864200 | 2.73521600  |
| C | -3.40294300 | 1.49379100  | -0.04203700 |

|    |             |             |             |
|----|-------------|-------------|-------------|
| C  | -3.94965700 | -1.43706800 | 0.43493400  |
| H  | -4.07170600 | -1.45461600 | 1.52542400  |
| H  | -4.06539500 | -2.46601100 | 0.08362600  |
| C  | -5.02129500 | -0.52580300 | -0.17506900 |
| H  | -6.01336700 | -0.86920200 | 0.14613100  |
| H  | -4.99851600 | -0.62049900 | -1.26396100 |
| C  | -4.82170500 | 0.93442800  | 0.24438700  |
| H  | -5.56718200 | 1.57294400  | -0.24963600 |
| H  | -5.01055900 | 1.02157200  | 1.32480200  |
| C  | -3.20537800 | 1.70701900  | -1.55913300 |
| H  | -3.89200900 | 2.48605400  | -1.91302000 |
| H  | -2.18654400 | 2.03330600  | -1.78417800 |
| H  | -3.40413200 | 0.81055100  | -2.14982700 |
| C  | -3.31538100 | 2.87679200  | 0.63924000  |
| H  | -4.16748800 | 3.49809500  | 0.33740300  |
| H  | -3.33772800 | 2.78674600  | 1.73168900  |
| H  | -2.40330400 | 3.41339200  | 0.36539500  |
| N  | 2.45785600  | 0.12283200  | 0.15036900  |
| Si | 3.16942000  | -1.36553700 | -0.29375000 |
| Si | 3.07588000  | 1.70012500  | -0.02466200 |
| C  | 2.65395200  | 2.51548900  | -1.70364700 |
| H  | 3.01999300  | 3.54872800  | -1.77283000 |
| H  | 3.09296900  | 1.94839500  | -2.53297200 |
| H  | 1.56944400  | 2.53157300  | -1.86371600 |
| C  | 4.97952900  | 1.83805200  | 0.13938900  |
| H  | 5.31525400  | 2.87798500  | 0.03064300  |
| H  | 5.31335800  | 1.48044400  | 1.12033400  |
| H  | 5.50147800  | 1.24399500  | -0.61988000 |
| C  | 2.38324800  | 2.87887400  | 1.30855100  |
| H  | 2.80911400  | 3.88509900  | 1.20300600  |
| H  | 1.29401800  | 2.97354200  | 1.24588200  |
| H  | 2.62325900  | 2.51672400  | 2.31463000  |
| C  | 3.92754500  | -1.36604500 | -2.05344100 |
| H  | 3.16137300  | -1.12744200 | -2.80029900 |
| H  | 4.72814200  | -0.62356900 | -2.15683800 |
| H  | 4.35276000  | -2.34523700 | -2.31119600 |
| C  | 4.57629600  | -1.92807900 | 0.87412400  |
| H  | 4.20294100  | -2.00948100 | 1.90138200  |
| H  | 4.98498700  | -2.90609100 | 0.58653100  |
| H  | 5.40463300  | -1.20988400 | 0.88104000  |
| C  | 1.89324100  | -2.77450900 | -0.28392700 |
| H  | 2.35506800  | -3.72302400 | -0.58673800 |
| H  | 1.46362000  | -2.90897900 | 0.71418000  |
| H  | 1.07786600  | -2.55866500 | -0.98351700 |
| N  | -2.16725500 | -1.18569700 | -1.30418900 |
| O  | -1.07075500 | -0.80898300 | -1.70387200 |
| O  | -2.98668300 | -1.76889200 | -2.02173600 |

Cartesian coordinates for optimized TS-6<sub>H4</sub> with (Me<sub>3</sub>Si)<sub>2</sub>N<sup>-</sup>

|   |             |             |             |
|---|-------------|-------------|-------------|
| C | -1.75668200 | 0.49545900  | 0.19186100  |
| C | -0.88936600 | 0.88546900  | -1.01912700 |
| C | 0.03392100  | -0.24365400 | -1.47279600 |
| C | -1.60670800 | -1.94907700 | -0.49553600 |
| C | -2.55815000 | -0.82588800 | -0.02588200 |
| H | 0.55709300  | -0.01929400 | -2.40767500 |
| H | -1.53170500 | 1.23582800  | -1.83759100 |
| H | -0.27424500 | 1.73929000  | -0.71896900 |
| H | -1.04171000 | 0.19327000  | 0.97289000  |
| H | -2.17640700 | -2.77686700 | -0.93040900 |
| H | -1.12113800 | -2.35070900 | 0.40058200  |
| H | 1.18550300  | -0.19617100 | -0.63518400 |
| C | -0.47743300 | -1.58963900 | -1.48841000 |
| O | -0.00101900 | -2.54103100 | -2.12777300 |
| C | -2.58529000 | 1.66398700  | 0.83268100  |
| C | -3.29839400 | -1.23917500 | 1.25890900  |
| H | -2.51614900 | -1.55211700 | 1.96165600  |
| H | -3.91821300 | -2.11781200 | 1.05941800  |
| C | -4.12230600 | -0.12106800 | 1.90747600  |

|    |             |             |             |
|----|-------------|-------------|-------------|
| H  | -4.50916400 | -0.47176300 | 2.87329200  |
| H  | -4.99383500 | 0.09771900  | 1.28470800  |
| C  | -3.27586200 | 1.13825600  | 2.11808200  |
| H  | -3.89269500 | 1.93972100  | 2.54781600  |
| H  | -2.49429700 | 0.92009700  | 2.86070900  |
| C  | -3.63471600 | 2.27218700  | -0.12393600 |
| H  | -4.10994800 | 3.13858000  | 0.35288900  |
| H  | -3.17030700 | 2.61801900  | -1.05154000 |
| H  | -4.43040600 | 1.57344900  | -0.39110700 |
| C  | -1.62682800 | 2.79563300  | 1.26246300  |
| H  | -2.16370700 | 3.52884000  | 1.87720100  |
| H  | -0.79026000 | 2.40708600  | 1.85377300  |
| H  | -1.20799500 | 3.32789600  | 0.40453700  |
| N  | 2.32076800  | 0.03243900  | 0.02132900  |
| Si | 3.30830700  | 1.24866000  | -0.67267500 |
| Si | 2.83688600  | -1.19206400 | 1.10293900  |
| C  | 3.13943600  | -0.56145000 | 2.88457100  |
| H  | 3.41118500  | -1.37983300 | 3.56462900  |
| H  | 3.94321100  | 0.18232100  | 2.92218900  |
| H  | 2.23551900  | -0.08396600 | 3.28138400  |
| C  | 4.45505800  | -2.07361300 | 0.58687900  |
| H  | 4.73588100  | -2.85656300 | 1.30359300  |
| H  | 4.33567700  | -2.54568700 | -0.39495100 |
| H  | 5.29832000  | -1.37632000 | 0.51493700  |
| C  | 1.53545800  | -2.56847700 | 1.26553500  |
| H  | 1.93112300  | -3.40463700 | 1.85576400  |
| H  | 0.63761700  | -2.20518600 | 1.77956100  |
| H  | 1.23594200  | -2.95165500 | 0.28472100  |
| C  | 4.61355300  | 1.96573700  | 0.52910600  |
| H  | 4.13698800  | 2.39713800  | 1.41689000  |
| H  | 5.32047500  | 1.20270700  | 0.87477900  |
| H  | 5.19884200  | 2.75908700  | 0.04584000  |
| C  | 4.28101400  | 0.66411800  | -2.20974200 |
| H  | 3.59606300  | 0.27074400  | -2.96961200 |
| H  | 4.86372800  | 1.47433700  | -2.66783900 |
| H  | 4.97505200  | -0.14420700 | -1.95233100 |
| C  | 2.29213900  | 2.75300700  | -1.25444700 |
| H  | 2.94906600  | 3.52400500  | -1.67737400 |
| H  | 1.56493500  | 2.47903400  | -2.02569500 |
| H  | 1.73940500  | 3.20558800  | -0.42319400 |
| N  | -3.59511100 | -0.68525700 | -1.16659400 |
| O  | -3.18200200 | -0.37841300 | -2.27983200 |
| O  | -4.78383100 | -0.92749000 | -0.93030200 |

#### Cartesian coordinates for optimized TS-1<sub>H1</sub> with LHMDS

|    |             |             |             |
|----|-------------|-------------|-------------|
| C  | -3.87586300 | -0.51357200 | -1.33233500 |
| C  | -4.05046400 | 0.61183500  | -0.30652000 |
| C  | -3.48553400 | 0.20406900  | 1.06223000  |
| C  | -1.63075400 | -1.03778800 | -0.22178000 |
| C  | -2.38517100 | -0.81910100 | -1.53914800 |
| H  | -3.32983900 | 1.06962700  | 1.71660200  |
| H  | -3.53159500 | 1.50874700  | -0.66900500 |
| H  | -5.10587100 | 0.88810900  | -0.20136800 |
| H  | -4.39178600 | -1.41582400 | -0.97493800 |
| H  | -0.39471000 | -0.39139600 | -0.13468100 |
| H  | -1.17799800 | -2.02867900 | -0.12257700 |
| H  | -4.20387300 | -0.43860000 | 1.59147100  |
| C  | -2.20046600 | -0.60434800 | 1.01697700  |
| O  | -1.61902500 | -0.82704800 | 2.12929100  |
| N  | 0.87975200  | 0.02230700  | 0.22504100  |
| Si | 1.10741200  | 1.73337000  | -0.04454800 |
| Si | 2.03030600  | -1.24406400 | -0.11277200 |
| C  | 3.84685500  | -0.71362000 | -0.00332600 |
| H  | 4.50227200  | -1.57239900 | -0.19101300 |
| H  | 4.09756200  | 0.05504700  | -0.74167300 |
| H  | 4.09821700  | -0.31748000 | 0.98628600  |
| C  | 1.74788200  | -2.06205700 | -1.79717400 |
| H  | 2.43223700  | -2.90324700 | -1.95699500 |

|    |             |             |             |
|----|-------------|-------------|-------------|
| H  | 0.72496400  | -2.44010900 | -1.89635700 |
| H  | 1.90998800  | -1.34287100 | -2.60762000 |
| C  | 1.77962400  | -2.58025400 | 1.23866600  |
| H  | 2.43330300  | -3.44127800 | 1.05921900  |
| H  | 2.04386400  | -2.21240200 | 2.24273700  |
| H  | 0.75520200  | -2.97448300 | 1.27508600  |
| C  | 2.33691200  | 2.48451700  | 1.19420000  |
| H  | 2.41653400  | 3.56969400  | 1.05836000  |
| H  | 2.01665300  | 2.31000900  | 2.22901500  |
| H  | 3.34224100  | 2.06533900  | 1.08477800  |
| C  | 1.71145300  | 2.14024400  | -1.79806800 |
| H  | 1.02123800  | 1.74670500  | -2.55275500 |
| H  | 1.78435300  | 3.22365100  | -1.94947300 |
| H  | 2.70039900  | 1.71568100  | -2.00345000 |
| C  | -0.55161600 | 2.61557200  | 0.20836500  |
| H  | -0.43170600 | 3.69947400  | 0.09914200  |
| H  | -1.29511200 | 2.29224200  | -0.52758900 |
| H  | -0.96752200 | 2.43122200  | 1.20569700  |
| H  | -2.27169500 | -1.70093100 | -2.17998900 |
| H  | -4.34357100 | -0.23673700 | -2.28474400 |
| H  | -1.93662300 | 0.01366800  | -2.10122200 |
| Li | 0.17053400  | -0.63860400 | 1.93580000  |

#### Cartesian coordinates for optimized TS-1<sub>H2</sub> with LHMDs

|    |             |             |             |
|----|-------------|-------------|-------------|
| C  | 3.31585700  | -0.62189100 | -1.55361600 |
| C  | 4.25356200  | -0.10035200 | -0.45890600 |
| C  | 3.45826700  | 0.59523800  | 0.65421500  |
| C  | 1.63044400  | -1.16274100 | 0.28664000  |
| C  | 2.33187100  | -1.65208200 | -0.98061400 |
| H  | 4.07648900  | 0.81550700  | 1.53099300  |
| H  | 4.81538100  | -0.94308000 | -0.03386400 |
| H  | 4.99577100  | 0.59088700  | -0.87432300 |
| H  | 2.76335300  | 0.22115200  | -1.99016500 |
| H  | 1.16207300  | -1.96229200 | 0.86572400  |
| H  | 0.40501700  | -0.51196200 | 0.09425400  |
| H  | 3.08575200  | 1.56839900  | 0.29962300  |
| C  | 2.25334300  | -0.19715900 | 1.13356400  |
| O  | 1.73569600  | 0.14391200  | 2.24828400  |
| N  | -0.87000400 | 0.01437900  | 0.29362600  |
| Si | -2.07573900 | -1.23244600 | 0.05028200  |
| Si | -1.01049700 | 1.66833400  | -0.26313600 |
| C  | -0.30805400 | 2.79817200  | 1.10993500  |
| H  | -0.33073200 | 3.84731000  | 0.79393900  |
| H  | -0.91173000 | 2.74620100  | 2.02879300  |
| H  | 0.73242000  | 2.57005500  | 1.37207300  |
| C  | -2.78343200 | 2.26883100  | -0.57199400 |
| H  | -2.76292000 | 3.30741700  | -0.92315800 |
| H  | -3.30070500 | 1.67777100  | -1.33449900 |
| H  | -3.39051600 | 2.24313800  | 0.33874700  |
| C  | -0.00894000 | 1.97593300  | -1.84080200 |
| H  | -0.07713400 | 3.02185000  | -2.16141000 |
| H  | 1.05052100  | 1.74105500  | -1.69560500 |
| H  | -0.37342200 | 1.35045000  | -2.66303900 |
| C  | -3.67323200 | -0.87843500 | 1.01654000  |
| H  | -3.47296400 | -0.75773500 | 2.08860400  |
| H  | -4.18170500 | 0.02679400  | 0.67227400  |
| H  | -4.37858700 | -1.71145100 | 0.91127200  |
| C  | -2.52518200 | -1.48335000 | -1.77709100 |
| H  | -1.63519600 | -1.72544600 | -2.36897000 |
| H  | -3.23761700 | -2.30760800 | -1.89956800 |
| H  | -2.98027700 | -0.59020300 | -2.21881600 |
| C  | -1.42757500 | -2.89604200 | 0.69810300  |
| H  | -2.22987900 | -3.64212900 | 0.65917600  |
| H  | -0.59535000 | -3.28263200 | 0.10156700  |
| H  | -1.09137800 | -2.83951600 | 1.74067800  |
| H  | 1.58773700  | -1.91641400 | -1.74349600 |
| H  | 3.89303700  | -1.07165600 | -2.36982600 |
| H  | 2.88404800  | -2.58017700 | -0.76899200 |

Li -0.06376600 0.29440300 2.06349500

#### Cartesian coordinates for optimized TS-1<sub>H3</sub> with LHMDS

C -3.87585900 -0.51356900 1.33234100  
C -2.38516600 -0.81909200 1.53915400  
C -1.63074700 -1.03779000 0.22178900  
C -3.48553700 0.20404000 -1.06223300  
C -4.05046500 0.61182400 0.30651200  
H -0.39469300 -0.39139900 0.13467700  
H -1.93662000 0.01368300 2.10122100  
H -2.27168800 -1.70091600 2.18000400  
H -4.39178000 -1.41582700 0.97495600  
H -3.32985200 1.06958700 -1.71662100  
H -4.20387400 -0.43864400 -1.59145900  
H -1.17798800 -2.02868100 0.12259600  
C -2.20046400 -0.60436800 -1.01697100  
O -1.61902600 -0.82707900 -2.12928500  
N 0.87975400 0.02230300 -0.22504500  
Si 1.10739300 1.73337000 0.04454100  
Si 2.03032300 -1.24405300 0.11277500  
C 1.74791200 -2.06203400 1.79718500  
H 2.43228000 -2.90321200 1.95701400  
H 1.91000600 -1.34283700 2.60762400  
H 0.72500000 -2.44010000 1.89637100  
C 3.84686400 -0.71358600 0.00332200  
H 4.50229300 -1.57235500 0.19100700  
H 4.09821700 -0.31744200 -0.98629100  
H 4.09756500 0.05508500 0.74166700  
C 1.77965400 -2.58025500 -1.23865100  
H 2.43334300 -3.44127000 -1.05919700  
H 0.75523700 -2.97449400 -1.27506700  
H 2.04388900 -2.21240800 -2.24272500  
C 1.71144100 2.14025300 1.79805600  
H 1.02121500 1.74674100 2.55274600  
H 2.70037600 1.71566800 2.00344600  
H 1.78436700 3.22366000 1.94944600  
C 2.33687500 2.48452800 -1.19421900  
H 2.01661100 2.31001100 -2.22903100  
H 2.41648200 3.56970700 -1.05838400  
H 3.34221100 2.06536500 -1.08480300  
C -0.55164600 2.61555300 -0.20836200  
H -0.43174500 3.69945700 -0.09915800  
H -0.96756500 2.43118100 -1.20568400  
H -1.29512800 2.29222700 0.52760900  
H -5.10587200 0.88809600 0.20135900  
H -4.34356600 -0.23672300 2.28474700  
H -3.53159500 1.50874100 0.66898300  
Li 0.17053400 -0.63861600 -1.93580600

#### Cartesian coordinates for optimized TS-1<sub>H4</sub> with LHMDS

C -3.41538400 0.20542700 -1.50668700  
C -2.39980500 -0.94573600 -1.52965000  
C -1.63676900 -1.08808000 -0.21238100  
C -3.46127800 0.22752700 1.01902200  
C -4.30300600 0.11836100 -0.25994100  
H -1.14125000 -2.05779400 -0.10090400  
H -2.93806700 -1.87866200 -1.75576300  
H -1.69332600 -0.80155600 -2.35752400  
H -2.88954300 1.16987000 -1.51127100  
H -4.03685800 -0.02505500 1.91602800  
H -3.12246900 1.26366800 1.16194400  
H -0.42517700 -0.38811900 -0.13047000  
C -2.22137300 -0.64974000 1.01669300  
O -1.64790500 -0.85460900 2.13699500  
N 0.85184500 0.02086400 0.23826700

|    |             |             |             |
|----|-------------|-------------|-------------|
| Si | 1.99081000  | -1.24967900 | -0.13172500 |
| Si | 1.10984600  | 1.73336000  | 0.00107200  |
| C  | -0.50161400 | 2.65972600  | 0.37644600  |
| H  | -0.34987100 | 3.74177700  | 0.29054600  |
| H  | -1.30098200 | 2.38450200  | -0.31880100 |
| H  | -0.85983300 | 2.45988900  | 1.39328400  |
| C  | 1.62510800  | 2.16667000  | -1.77404800 |
| H  | 1.72942700  | 3.25025400  | -1.90406900 |
| H  | 2.58416300  | 1.71195100  | -2.04641600 |
| H  | 0.87888800  | 1.81694200  | -2.49627900 |
| C  | 2.42364100  | 2.42641200  | 1.18642400  |
| H  | 2.50521000  | 3.51481400  | 1.08055300  |
| H  | 2.16469400  | 2.22132900  | 2.23267700  |
| H  | 3.41617900  | 2.00371600  | 1.00314100  |
| C  | 1.67734000  | -2.04519500 | -1.82174300 |
| H  | 2.35967300  | -2.88354200 | -2.00381700 |
| H  | 0.65359100  | -2.42299900 | -1.91051100 |
| H  | 1.82713900  | -1.31494800 | -2.62475300 |
| C  | 3.81301100  | -0.73294000 | -0.05385800 |
| H  | 4.09159800  | -0.35834100 | 0.93664800  |
| H  | 4.45531600  | -1.59408100 | -0.27340800 |
| H  | 4.05343400  | 0.04701200  | -0.78378700 |
| C  | 1.76127200  | -2.59900400 | 1.20940300  |
| H  | 0.73733800  | -2.99231100 | 1.26137100  |
| H  | 2.41046500  | -3.45903400 | 1.00975000  |
| H  | 2.04397500  | -2.23964200 | 2.21131800  |
| H  | -5.06947800 | 0.90171200  | -0.26861700 |
| H  | -4.02764900 | 0.18032300  | -2.41561200 |
| H  | -4.83760600 | -0.84121200 | -0.26609600 |
| Li | 0.14177000  | -0.65058500 | 1.94602500  |

#### Cartesian coordinates for optimized TS-4<sub>H2</sub> with LHMSD

|    |             |             |             |
|----|-------------|-------------|-------------|
| C  | -2.46679300 | 0.38088900  | -0.43893300 |
| C  | -2.74482800 | -0.20366900 | -1.83969700 |
| C  | -1.43575900 | -0.57650400 | -2.57790600 |
| C  | -1.64156500 | -0.64668400 | 0.41677300  |
| H  | -1.63384600 | -1.07655700 | -3.52898900 |
| H  | -3.38072600 | -1.09663200 | -1.76970200 |
| H  | -3.29403400 | 0.51557300  | -2.45259500 |
| H  | -1.74552200 | 1.19718000  | -0.58193700 |
| H  | -0.86347400 | 0.33856800  | -2.78034400 |
| C  | -0.59670500 | -1.47248600 | -1.70628100 |
| O  | -0.18651000 | -2.57926100 | -2.11397700 |
| C  | -3.69099100 | 1.07119100  | 0.25424600  |
| C  | -1.31531100 | -0.04127800 | 1.81980400  |
| H  | -0.55239000 | 0.72675900  | 1.65046100  |
| H  | -0.83715300 | -0.80127800 | 2.45010000  |
| C  | -2.53740100 | 0.56214500  | 2.52118200  |
| H  | -2.21222900 | 1.03379000  | 3.45526200  |
| H  | -3.24540900 | -0.22287500 | 2.81694400  |
| C  | -3.23169200 | 1.60339500  | 1.63685900  |
| H  | -4.09801400 | 2.02602600  | 2.16061300  |
| H  | -2.53435800 | 2.43591100  | 1.47209500  |
| C  | -4.93646600 | 0.17121100  | 0.41124700  |
| H  | -5.78824900 | 0.77769700  | 0.73698100  |
| H  | -5.22115200 | -0.30285900 | -0.53341400 |
| H  | -4.81418900 | -0.61738500 | 1.15857300  |
| C  | -4.11098700 | 2.29492000  | -0.59264400 |
| H  | -4.84219700 | 2.89602400  | -0.04177000 |
| H  | -3.25427300 | 2.93841500  | -0.81905800 |
| H  | -4.57929700 | 2.00640700  | -1.53859100 |
| C  | -2.34648200 | -1.96896600 | 0.68385900  |
| H  | -3.34078700 | -1.94529000 | 1.15441400  |
| O  | -1.85048900 | -3.07552500 | 0.46361600  |
| C  | -0.34000600 | -0.99290100 | -0.32931100 |
| Li | -0.12158200 | -3.46134200 | -0.45456600 |
| H  | 0.49324000  | -0.18319700 | -0.32063900 |
| H  | 0.20881000  | -1.72463700 | 0.26386600  |

|    |            |             |             |
|----|------------|-------------|-------------|
| N  | 2.14338500 | 0.28986500  | 0.02639000  |
| Si | 2.44498600 | 1.90614800  | -0.40003500 |
| Si | 3.17549900 | -0.91810100 | 0.60059200  |
| C  | 2.45128300 | -2.71339100 | 0.32636400  |
| H  | 3.23081300 | -3.46420700 | 0.49868000  |
| H  | 1.64404800 | -2.93306900 | 1.04566900  |
| H  | 2.10231600 | -2.82722400 | -0.70936900 |
| C  | 3.50133400 | -0.87720600 | 2.48115700  |
| H  | 4.12355500 | -1.71551700 | 2.81926500  |
| H  | 4.01287000 | 0.05018900  | 2.76287700  |
| H  | 2.56159100 | -0.90808000 | 3.04621900  |
| C  | 4.88416700 | -1.01949900 | -0.24190500 |
| H  | 5.49098400 | -1.84452800 | 0.15155100  |
| H  | 4.78303500 | -1.16131000 | -1.32383400 |
| H  | 5.45104800 | -0.09388300 | -0.08841600 |
| C  | 3.37085300 | 2.92954100  | 0.92038400  |
| H  | 2.83723300 | 2.91452400  | 1.87792400  |
| H  | 4.37461300 | 2.52702700  | 1.10276300  |
| H  | 3.48918800 | 3.97820000  | 0.61981000  |
| C  | 3.42554300 | 2.12878100  | -2.02358700 |
| H  | 2.92036600 | 1.63028900  | -2.85960000 |
| H  | 3.54734700 | 3.18633500  | -2.29004500 |
| H  | 4.42683600 | 1.69026100  | -1.94522700 |
| C  | 0.79069500 | 2.82742200  | -0.69168800 |
| H  | 0.95864200 | 3.87433700  | -0.97122400 |
| H  | 0.21323900 | 2.36692700  | -1.50420300 |
| H  | 0.16445100 | 2.82723300  | 0.20942200  |

#### Cartesian coordinates for optimized TS-4<sub>H4</sub> with LHMDS

|    |             |             |             |
|----|-------------|-------------|-------------|
| C  | 1.87120600  | -0.42072800 | -0.29806200 |
| C  | 1.21892800  | -0.00541800 | -1.63874200 |
| C  | 0.02015700  | 0.97072100  | -1.48169100 |
| C  | 0.85230300  | 1.61515500  | 0.77383100  |
| C  | 2.17887900  | 0.84328900  | 0.60150400  |
| H  | 1.97073200  | 0.45490500  | -2.29907200 |
| H  | 0.86343800  | -0.90380200 | -2.15735300 |
| H  | 1.07508700  | -0.92006800 | 0.27140700  |
| H  | 0.96968000  | 2.46933100  | 1.44578100  |
| H  | 0.10745400  | 0.94208300  | 1.21613700  |
| C  | 0.30578600  | 2.04737600  | -0.56768700 |
| O  | 0.10891600  | 3.26822200  | -0.80493600 |
| C  | 3.00589100  | -1.50507000 | -0.40861100 |
| C  | 2.72116400  | 0.36539700  | 1.98369500  |
| H  | 1.87412900  | -0.10663400 | 2.49261700  |
| H  | 3.00677700  | 1.22718500  | 2.59332900  |
| C  | 3.87145400  | -0.64170900 | 1.88138800  |
| H  | 4.13756600  | -0.98014200 | 2.88834600  |
| H  | 4.77607200  | -0.16605100 | 1.48368100  |
| C  | 3.48346600  | -1.85297100 | 1.02557800  |
| H  | 4.32562400  | -2.55304000 | 0.95835600  |
| H  | 2.67295800  | -2.39315300 | 1.53312200  |
| C  | 4.20877100  | -1.10538400 | -1.29563400 |
| H  | 4.82698300  | -1.98876700 | -1.48647300 |
| H  | 3.88702100  | -0.71982000 | -2.26959800 |
| H  | 4.86578900  | -0.36129600 | -0.83713700 |
| C  | 2.40260000  | -2.79349500 | -1.01837300 |
| H  | 3.12158300  | -3.61498700 | -0.92953000 |
| H  | 1.48311600  | -3.09068300 | -0.50257800 |
| H  | 2.17174000  | -2.67511700 | -2.08295800 |
| C  | 3.22391700  | 1.76536500  | 0.03465400  |
| H  | 4.22481600  | 1.35406000  | -0.14832100 |
| O  | 3.06713100  | 2.96914400  | -0.18368900 |
| Li | 1.60139300  | 4.14179200  | -0.33477700 |
| H  | -0.32367500 | 1.33517100  | -2.45353700 |
| H  | -0.89888800 | 0.38110900  | -0.93997400 |
| N  | -2.15112400 | -0.25648900 | -0.01430600 |
| Si | -3.27470100 | 1.01018300  | 0.19702800  |
| Si | -2.24590200 | -1.95473000 | 0.03417900  |

|   |             |             |             |
|---|-------------|-------------|-------------|
| C | -1.66183800 | -2.76096200 | -1.60302400 |
| H | -1.88286800 | -3.83668100 | -1.61823300 |
| H | -2.17543100 | -2.30273600 | -2.45685700 |
| H | -0.58300000 | -2.65170900 | -1.77527700 |
| C | -3.96548900 | -2.72841300 | 0.33961300  |
| H | -3.87354800 | -3.81720200 | 0.44509200  |
| H | -4.43755800 | -2.34643500 | 1.25024400  |
| H | -4.65208600 | -2.53446500 | -0.49232200 |
| C | -1.15078400 | -2.70631600 | 1.41863500  |
| H | -1.09329300 | -3.79974700 | 1.35243100  |
| H | -0.12201700 | -2.32160300 | 1.39940400  |
| H | -1.56371700 | -2.45562400 | 2.40305800  |
| C | -5.06162700 | 0.50515700  | 0.63604200  |
| H | -5.51147400 | -0.12368400 | -0.14052900 |
| H | -5.11528000 | -0.04872400 | 1.57861200  |
| H | -5.68715700 | 1.40018500  | 0.74239400  |
| C | -2.75434300 | 2.21081800  | 1.59700500  |
| H | -2.59325400 | 1.67060100  | 2.53654800  |
| H | -1.83089700 | 2.74829300  | 1.35750200  |
| H | -3.52640400 | 2.96901400  | 1.77893400  |
| C | -3.42952900 | 2.10542700  | -1.36251400 |
| H | -4.19998500 | 2.87511100  | -1.22808700 |
| H | -2.49341300 | 2.62432000  | -1.60083100 |
| H | -3.70835400 | 1.50615000  | -2.23738400 |

#### Cartesian coordinates for optimized TS-5<sub>H2</sub> with LHMDS

|    |             |             |             |
|----|-------------|-------------|-------------|
| C  | 2.56840900  | 0.48712100  | 0.44358900  |
| C  | 2.70659400  | -0.01276000 | 1.89608700  |
| C  | 1.33196400  | -0.26778200 | 2.57135100  |
| C  | 1.68188900  | -0.47499100 | -0.40816700 |
| H  | 1.45367000  | -0.69201900 | 3.57042500  |
| H  | 3.29039000  | -0.94043400 | 1.92937000  |
| H  | 3.25222500  | 0.72152100  | 2.49363900  |
| H  | 1.96525600  | 1.40585800  | 0.47925400  |
| H  | 0.77964500  | 0.67661000  | 2.64719000  |
| C  | 0.56505000  | -1.21911400 | 1.70062100  |
| O  | 0.26218600  | -2.36596000 | 2.08231600  |
| C  | 3.91668200  | 0.88782900  | -0.24659000 |
| C  | 1.45108000  | 0.08568100  | -1.83016100 |
| H  | 0.83281200  | 0.98256700  | -1.71405200 |
| H  | 0.85971100  | -0.62477100 | -2.41738900 |
| C  | 2.76897700  | 0.42862800  | -2.52817000 |
| H  | 2.55617100  | 0.87987600  | -3.50340900 |
| H  | 3.33364200  | -0.48971400 | -2.73515700 |
| C  | 3.60350600  | 1.39497100  | -1.67996200 |
| H  | 4.54871900  | 1.62204300  | -2.18755400 |
| H  | 3.05990300  | 2.34650000  | -1.60020300 |
| C  | 4.93363100  | -0.27193600 | -0.30262200 |
| H  | 5.85445400  | 0.06959800  | -0.78736200 |
| H  | 5.20560900  | -0.62193200 | 0.69771200  |
| H  | 4.57566100  | -1.13670600 | -0.86817600 |
| C  | 4.56129100  | 2.05706700  | 0.52771200  |
| H  | 5.42102200  | 2.44522700  | -0.02860100 |
| H  | 3.85519400  | 2.88343500  | 0.66559700  |
| H  | 4.92612100  | 1.75308900  | 1.51327900  |
| C  | 0.32123600  | -0.76861700 | 0.30680500  |
| Li | 0.21366200  | -3.42622900 | 0.52041300  |
| H  | -0.51441800 | 0.02441100  | 0.24530900  |
| H  | -0.18747100 | -1.54093700 | -0.27049800 |
| N  | -2.25083500 | 0.25903200  | -0.03202800 |
| Si | -2.62721100 | 1.88368500  | 0.28716400  |
| Si | -3.19010600 | -1.04297300 | -0.54847600 |
| C  | -2.30415800 | -2.76848100 | -0.25813900 |
| H  | -3.01555400 | -3.58633100 | -0.41801000 |
| H  | -1.48364300 | -2.92138800 | -0.98047400 |
| H  | -1.94800900 | -2.82903800 | 0.77956100  |
| C  | -3.57779900 | -1.08423100 | -2.41634900 |
| H  | -4.13683200 | -1.98111600 | -2.71158500 |



|   |             |             |             |
|---|-------------|-------------|-------------|
| H | -4.17547700 | -0.21156500 | -2.70313600 |
| H | -2.65778200 | -1.05064200 | -3.01261900 |
| C | -4.85103400 | -1.27822000 | 0.35872600  |
| H | -5.39401000 | -2.16536600 | 0.00974400  |
| H | -4.69995600 | -1.37743200 | 1.43959000  |
| H | -5.50392100 | -0.41167100 | 0.20238100  |
| C | -3.56588900 | 2.78530400  | -1.10956600 |
| H | -3.01483000 | 2.72878000  | -2.05557200 |
| H | -4.55090500 | 2.33462700  | -1.28122300 |
| H | -3.72746500 | 3.84590200  | -0.87934000 |
| C | -3.64579400 | 2.16197300  | 1.87752100  |
| H | -3.13469100 | 1.74031500  | 2.75125900  |
| H | -3.81982000 | 3.22737900  | 2.07439900  |
| H | -4.62489600 | 1.67391000  | 1.81102200  |
| C | -1.01242300 | 2.88261300  | 0.54592900  |
| H | -1.22299700 | 3.93733700  | 0.75901200  |
| H | -0.42911100 | 2.49506500  | 1.39188500  |
| H | -0.37187100 | 2.85295100  | -0.34483500 |
| C | 2.17327500  | -1.87911400 | -0.48647100 |
| N | 2.22062200  | -3.04548600 | -0.43878500 |

#### Cartesian coordinates for optimized TS-5<sub>H4</sub> with LHMDS

|    |             |             |             |
|----|-------------|-------------|-------------|
| C  | 1.83857000  | -0.44312800 | -0.25794700 |
| C  | 1.21813300  | 0.02427200  | -1.59151600 |
| C  | 0.09588000  | 1.09693900  | -1.46184600 |
| C  | 0.82381300  | 1.59965100  | 0.85461100  |
| C  | 2.14009200  | 0.75768100  | 0.70655600  |
| H  | 2.00381700  | 0.42571700  | -2.24536800 |
| H  | 0.79913900  | -0.84241900 | -2.10658300 |
| H  | 1.04894700  | -0.98005400 | 0.28167000  |
| H  | 0.95945100  | 2.41569700  | 1.56986600  |
| H  | 0.02352200  | 0.92608800  | 1.18911100  |
| C  | 0.47151400  | 2.12740900  | -0.52039600 |
| O  | 0.58991300  | 3.35792700  | -0.77216900 |
| C  | 3.02815100  | -1.45568400 | -0.39780100 |
| C  | 2.64711400  | 0.26224800  | 2.08205600  |
| H  | 1.80208800  | -0.25491600 | 2.55173400  |
| H  | 2.89156200  | 1.11908400  | 2.72000500  |
| C  | 3.83380400  | -0.69562000 | 1.94884900  |
| H  | 4.10850000  | -1.06936600 | 2.94142600  |
| H  | 4.71214000  | -0.15338200 | 1.57526300  |
| C  | 3.48974500  | -1.86989400 | 1.02537900  |
| H  | 4.35306000  | -2.54019200 | 0.93633000  |
| H  | 2.68892000  | -2.45867800 | 1.49300200  |
| C  | 4.22637100  | -0.89667400 | -1.19556200 |
| H  | 5.00182000  | -1.66616000 | -1.27478500 |
| H  | 3.94222300  | -0.61906700 | -2.21459900 |
| H  | 4.69208200  | -0.02235500 | -0.73259000 |
| C  | 2.53303000  | -2.72982400 | -1.11354200 |
| H  | 3.31317300  | -3.49846900 | -1.08876700 |
| H  | 1.64170100  | -3.14146700 | -0.62994800 |
| H  | 2.29171400  | -2.54463000 | -2.16393700 |
| Li | 2.24090600  | 4.04236600  | -0.87101900 |
| H  | -0.15327200 | 1.51553200  | -2.44053200 |
| H  | -0.87245700 | 0.55624500  | -0.97100800 |
| N  | -2.09895100 | -0.14182700 | -0.13329900 |
| Si | -3.32138900 | 1.00228100  | 0.21390200  |
| Si | -2.23158400 | -1.84291700 | -0.07004000 |
| C  | -1.56278300 | -2.69119200 | -1.64665900 |
| H  | -1.70908600 | -3.77763900 | -1.60226700 |
| H  | -2.09101000 | -2.32274000 | -2.53358100 |
| H  | -0.49329700 | -2.51776600 | -1.80849100 |
| C  | -4.00080400 | -2.53971800 | 0.11715500  |
| H  | -3.97411800 | -3.63317800 | 0.20386000  |
| H  | -4.51042800 | -2.15422800 | 1.00690500  |
| H  | -4.62243700 | -2.29444200 | -0.75075600 |
| C  | -1.26439700 | -2.61188900 | 1.39548300  |
| H  | -1.33839000 | -3.70670600 | 1.40190800  |

|   |             |             |             |
|---|-------------|-------------|-------------|
| H | -0.19604500 | -2.36048500 | 1.38163200  |
| H | -1.66590400 | -2.24817400 | 2.34878200  |
| C | -4.84989200 | 0.92534500  | -0.92802300 |
| H | -4.55435000 | 1.01739800  | -1.97986800 |
| H | -5.38983700 | -0.02142700 | -0.82279400 |
| H | -5.55792800 | 1.73481000  | -0.70946300 |
| C | -3.98159700 | 0.91413800  | 2.00578600  |
| H | -4.45448700 | -0.05098000 | 2.21906200  |
| H | -3.16865600 | 1.04397300  | 2.73038600  |
| H | -4.72759200 | 1.69516100  | 2.20011100  |
| C | -2.68742400 | 2.79775400  | 0.02915600  |
| H | -3.51922100 | 3.48877000  | 0.21314400  |
| H | -1.90141200 | 3.05358000  | 0.74943300  |
| H | -2.30528300 | 3.01534400  | -0.97415300 |
| C | 3.07942800  | 1.74853200  | 0.13899800  |
| N | 3.63587300  | 2.67437400  | -0.29987500 |

### Cartesian coordinates for optimized TS-6<sub>H2</sub> with LHMDS

|    |             |             |             |
|----|-------------|-------------|-------------|
| C  | 2.42590100  | 0.52874400  | 0.48007700  |
| C  | 2.76463300  | -0.04682000 | 1.87119700  |
| C  | 1.48671500  | -0.43368900 | 2.66610100  |
| C  | 1.56543200  | -0.48796600 | -0.32896600 |
| H  | 1.72806200  | -0.95586300 | 3.59473100  |
| H  | 3.41444100  | -0.92376900 | 1.77621000  |
| H  | 3.32210200  | 0.68837700  | 2.45608400  |
| H  | 1.67069000  | 1.30914700  | 0.65180800  |
| H  | 0.92929500  | 0.47964100  | 2.91402300  |
| C  | 0.59908500  | -1.30083900 | 1.81663200  |
| O  | 0.21550100  | -2.42249300 | 2.18034500  |
| C  | 3.58144300  | 1.31314100  | -0.24304400 |
| C  | 1.27070900  | -0.02626400 | -1.77118100 |
| H  | 0.48946700  | 0.73777300  | -1.68475500 |
| H  | 0.82294200  | -0.85273500 | -2.33373900 |
| C  | 2.50411000  | 0.54487200  | -2.47509400 |
| H  | 2.20822900  | 0.89986700  | -3.46827500 |
| H  | 3.24982800  | -0.24170200 | -2.63877700 |
| C  | 3.10258100  | 1.70149000  | -1.66748400 |
| H  | 3.94636300  | 2.14393500  | -2.20988200 |
| H  | 2.34312500  | 2.49113100  | -1.58304200 |
| C  | 4.94074000  | 0.58666300  | -0.31652700 |
| H  | 4.94131000  | -0.25122700 | -1.01107100 |
| H  | 5.70649400  | 1.29779100  | -0.64465400 |
| H  | 5.25183700  | 0.20647100  | 0.66172200  |
| C  | 3.80726700  | 2.62834900  | 0.54123800  |
| H  | 4.50131000  | 3.27280000  | -0.00797400 |
| H  | 2.87389900  | 3.18524200  | 0.67779100  |
| H  | 4.24673300  | 2.45234500  | 1.52824700  |
| C  | 0.28138200  | -0.77733800 | 0.44942100  |
| Li | -0.15828800 | -3.28513300 | 0.51548600  |
| H  | -0.41059200 | 0.09503100  | 0.49195600  |
| H  | -0.35516600 | -1.44380700 | -0.12229600 |
| N  | -2.38573900 | 0.28766200  | -0.04010100 |
| Si | -2.68870300 | 1.91626500  | 0.29940000  |
| Si | -3.34585700 | -0.99378300 | -0.53688800 |
| C  | -2.46123400 | -2.72179700 | -0.22697100 |
| H  | -3.15101500 | -3.55324300 | -0.40671800 |
| H  | -1.62238900 | -2.84921500 | -0.93316000 |
| H  | -2.14579100 | -2.77018600 | 0.82611700  |
| C  | -3.73379000 | -1.06969800 | -2.40426300 |
| H  | -4.30045200 | -1.96715600 | -2.68283600 |
| H  | -4.32561700 | -0.19787900 | -2.70576200 |
| H  | -2.81464400 | -1.05288100 | -3.00247400 |
| C  | -5.00782400 | -1.22591100 | 0.37076200  |
| H  | -4.85916000 | -1.30748300 | 1.45352300  |
| H  | -5.66293300 | -0.36370500 | 0.20012600  |
| H  | -5.54768000 | -2.11994800 | 0.03446600  |
| C  | -1.04098500 | 2.82484300  | 0.68621500  |
| H  | -1.20823200 | 3.88475000  | 0.91182400  |

|   |             |             |             |
|---|-------------|-------------|-------------|
| H | -0.53595100 | 2.38882000  | 1.55930400  |
| H | -0.34704000 | 2.78129200  | -0.16382900 |
| C | -3.47951900 | 2.90913900  | -1.12815700 |
| H | -3.59298200 | 3.97213700  | -0.88064200 |
| H | -2.87473300 | 2.84075400  | -2.04005400 |
| H | -4.47601400 | 2.52135700  | -1.37200800 |
| C | -3.78644900 | 2.22999600  | 1.83067200  |
| H | -4.78792000 | 1.80645500  | 1.69224400  |
| H | -3.35968300 | 1.76044300  | 2.72506100  |
| H | -3.90633700 | 3.30038600  | 2.04067200  |
| N | 2.25518100  | -1.89871800 | -0.48939900 |
| O | 3.45208100  | -1.96830700 | -0.67294800 |
| O | 1.53112000  | -2.92277400 | -0.47275400 |

#### Cartesian coordinates for optimized TS-6<sub>H4</sub> with LHMDS

|    |             |             |             |
|----|-------------|-------------|-------------|
| C  | -1.65192000 | 0.55114500  | -0.33324200 |
| C  | -1.05667100 | 0.04774700  | -1.66266800 |
| C  | 0.02228600  | -1.05349400 | -1.49808200 |
| C  | -0.79009800 | -1.56031600 | 0.79698700  |
| C  | -1.98474100 | -0.57331300 | 0.69712800  |
| H  | -1.85074500 | -0.32534200 | -2.32033100 |
| H  | -0.59908200 | 0.89686700  | -2.17374400 |
| H  | -0.81690200 | 1.04453200  | 0.18065800  |
| H  | -1.01182900 | -2.38171300 | 1.48468500  |
| H  | 0.06409000  | -0.97971400 | 1.17575900  |
| C  | -0.39861400 | -2.07935300 | -0.56843700 |
| O  | -0.45985000 | -3.31591900 | -0.81346700 |
| C  | -2.76453700 | 1.65070200  | -0.45969600 |
| C  | -2.34052800 | 0.02501300  | 2.06420700  |
| H  | -1.40817500 | 0.46097700  | 2.44092700  |
| H  | -2.62382200 | -0.76925300 | 2.76011200  |
| C  | -3.41956200 | 1.11396500  | 1.99396400  |
| H  | -3.52262900 | 1.57071800  | 2.98441900  |
| H  | -4.38924200 | 0.66096200  | 1.76615200  |
| C  | -3.06780900 | 2.19289700  | 0.96277600  |
| H  | -3.88336800 | 2.92346700  | 0.89823800  |
| H  | -2.18629700 | 2.74569300  | 1.31435300  |
| C  | -4.06260900 | 1.14911500  | -1.12962200 |
| H  | -4.73901400 | 1.99578400  | -1.28773000 |
| H  | -3.86843200 | 0.70211400  | -2.10891200 |
| H  | -4.61106600 | 0.41895600  | -0.52955100 |
| C  | -2.22572400 | 2.82904200  | -1.29812000 |
| H  | -2.92678800 | 3.66907700  | -1.24714100 |
| H  | -1.25761200 | 3.17913400  | -0.92689000 |
| H  | -2.10955100 | 2.56603600  | -2.35342900 |
| Li | -2.12608900 | -3.57909600 | -1.41358000 |
| H  | 0.30776100  | -1.47861000 | -2.46457800 |
| H  | 0.99472900  | -0.54928800 | -0.97340600 |
| N  | 2.22531000  | 0.09381900  | -0.09201900 |
| Si | 3.41363200  | -1.08974600 | 0.26407700  |
| Si | 2.44064100  | 1.79148100  | -0.07376000 |
| C  | 1.89570500  | 2.61631200  | -1.70848300 |
| H  | 2.05849800  | 3.70076700  | -1.67605200 |
| H  | 2.47863200  | 2.22019200  | -2.54793300 |
| H  | 0.83813200  | 2.45560200  | -1.94367900 |
| C  | 4.22726600  | 2.41505700  | 0.18452600  |
| H  | 4.23989000  | 3.51048000  | 0.24520400  |
| H  | 4.67719700  | 2.03226000  | 1.10676000  |
| H  | 4.87959800  | 2.12578500  | -0.64621400 |
| C  | 1.44226100  | 2.64201200  | 1.32238700  |
| H  | 1.57265800  | 3.73128500  | 1.30592000  |
| H  | 0.36462800  | 2.44552700  | 1.26232100  |
| H  | 1.78003000  | 2.28349400  | 2.30191100  |
| C  | 4.95292100  | -1.05782700 | -0.86498100 |
| H  | 4.66377300  | -1.13386300 | -1.91987400 |
| H  | 5.52810200  | -0.13349000 | -0.74961700 |
| H  | 5.62725000  | -1.89500800 | -0.64476200 |
| C  | 4.05385500  | -1.00625400 | 2.06270300  |

|   |             |             |             |
|---|-------------|-------------|-------------|
| H | 4.55189900  | -0.05436800 | 2.27671100  |
| H | 3.22853100  | -1.10970900 | 2.77718100  |
| H | 4.77413300  | -1.80802700 | 2.26852100  |
| C | 2.73302000  | -2.86497100 | 0.08083700  |
| H | 3.54453300  | -3.57552800 | 0.28021000  |
| H | 1.93074000  | -3.09609800 | 0.79064800  |
| H | 2.35807100  | -3.07923500 | -0.92551800 |
| N | -3.16322900 | -1.48763600 | 0.24945000  |
| O | -4.08658700 | -1.71698500 | 1.00370400  |
| O | -3.08624500 | -2.03279700 | -0.88525600 |

#### Cartesian coordinates for optimized TS-4<sub>H2</sub> with KHMDS

|    |             |             |             |
|----|-------------|-------------|-------------|
| C  | 2.33570600  | -0.69715800 | -0.39380500 |
| C  | 2.72070000  | -0.05360900 | -1.73808000 |
| C  | 1.47974100  | 0.45964100  | -2.48898800 |
| C  | 1.60149300  | 0.36552500  | 0.50038300  |
| H  | 1.75038500  | 1.03315600  | -3.37808500 |
| H  | 3.41816200  | 0.77826600  | -1.58046700 |
| H  | 3.24336400  | -0.77266700 | -2.37249500 |
| H  | 1.53772700  | -1.41534500 | -0.61049100 |
| H  | 0.88095300  | -0.39510200 | -2.82876600 |
| C  | 0.57674800  | 1.31804600  | -1.62317400 |
| O  | 0.01101900  | 2.30917300  | -2.12627200 |
| C  | 3.45303900  | -1.56583000 | 0.27833200  |
| C  | 1.18084200  | -0.28428900 | 1.85532600  |
| H  | 0.34329600  | -0.95049100 | 1.62830800  |
| H  | 0.77638400  | 0.48444800  | 2.52435800  |
| C  | 2.30524200  | -1.06328600 | 2.54689300  |
| H  | 1.90082400  | -1.55159100 | 3.43935500  |
| H  | 3.08839500  | -0.38790400 | 2.91000200  |
| C  | 2.90386700  | -2.12161300 | 1.61639400  |
| H  | 3.70361000  | -2.66777300 | 2.12953200  |
| H  | 2.12490100  | -2.85923100 | 1.38789200  |
| C  | 4.79321700  | -0.83484600 | 0.50847400  |
| H  | 5.55764600  | -1.55792000 | 0.80901000  |
| H  | 5.15044700  | -0.34657900 | -0.40216100 |
| H  | 4.74878100  | -0.08096800 | 1.29619600  |
| C  | 3.74669100  | -2.77882700 | -0.63413500 |
| H  | 4.39316000  | -3.49023400 | -0.11120900 |
| H  | 2.82732100  | -3.30292000 | -0.90948700 |
| H  | 4.26179900  | -2.49048600 | -1.55378800 |
| C  | 2.48383700  | 1.55173600  | 0.86567800  |
| H  | 3.39344600  | 1.33884100  | 1.45012800  |
| O  | 2.23118900  | 2.72103800  | 0.61774600  |
| C  | 0.36522200  | 0.89234000  | -0.24717000 |
| H  | -0.64028300 | 0.10403300  | -0.22163800 |
| H  | -0.10657300 | 1.67890800  | 0.34070400  |
| N  | -1.98700400 | -0.52102900 | 0.02394300  |
| Si | -2.33133500 | -2.01855300 | -0.72944900 |
| Si | -3.07176900 | 0.45830300  | 0.90144900  |
| C  | -2.60168000 | 2.32681500  | 0.80886600  |
| H  | -3.43022900 | 2.93738100  | 1.18297100  |
| H  | -1.72557000 | 2.55274400  | 1.42959300  |
| H  | -2.40811600 | 2.60863900  | -0.23232600 |
| C  | -3.12450500 | 0.07612700  | 2.76692200  |
| H  | -3.79020400 | 0.75575300  | 3.31169800  |
| H  | -3.47620000 | -0.94562400 | 2.94236100  |
| H  | -2.12654600 | 0.15505300  | 3.21191700  |
| C  | -4.87636400 | 0.42027300  | 0.29330600  |
| H  | -5.50930500 | 1.07389600  | 0.90447900  |
| H  | -4.95098100 | 0.75655000  | -0.74568500 |
| H  | -5.30326300 | -0.58595600 | 0.34356700  |
| C  | -3.34726600 | -1.85984600 | -2.33278700 |
| H  | -4.33658200 | -1.43470600 | -2.13799500 |
| H  | -2.84376500 | -1.19923500 | -3.04674900 |
| H  | -3.49366200 | -2.83110800 | -2.81943900 |
| C  | -0.73614300 | -2.92904800 | -1.23496800 |
| H  | -0.09700100 | -3.13575200 | -0.37064400 |

|   |             |             |             |
|---|-------------|-------------|-------------|
| H | -0.98414900 | -3.89092700 | -1.69675900 |
| H | -0.15088200 | -2.36183200 | -1.96551300 |
| C | -3.26847200 | -3.24808000 | 0.38712800  |
| H | -3.43845000 | -4.20178800 | -0.12561200 |
| H | -2.70167300 | -3.45668300 | 1.30071600  |
| H | -4.24728200 | -2.86268000 | 0.69035400  |
| K | 0.12228700  | 4.12223300  | -0.37046300 |

#### Cartesian coordinates for optimized TS-4<sub>H4</sub> with KHMDS

|    |             |             |             |
|----|-------------|-------------|-------------|
| C  | -1.32111500 | -1.18037100 | 0.22389900  |
| C  | -0.97114900 | -0.33457500 | 1.45784400  |
| C  | -0.29772400 | 1.00161700  | 1.07729200  |
| C  | -1.50412600 | 0.92992100  | -1.15162200 |
| C  | -2.26505000 | -0.35686800 | -0.74606100 |
| H  | -1.86500700 | -0.15334400 | 2.06833900  |
| H  | -0.27396700 | -0.88648500 | 2.08858700  |
| H  | -0.39369400 | -1.26724200 | -0.35609000 |
| H  | -2.11250700 | 1.56644700  | -1.79958100 |
| H  | -0.61947800 | 0.62999100  | -1.72190200 |
| C  | -1.01260900 | 1.74143800  | 0.03065700  |
| O  | -1.19880300 | 2.96699500  | 0.05865300  |
| C  | -1.74716900 | -2.65505900 | 0.52396600  |
| C  | -2.60234200 | -1.19675100 | -2.00947800 |
| H  | -1.68699400 | -1.25661200 | -2.60685900 |
| H  | -3.33546000 | -0.66419000 | -2.62765400 |
| C  | -3.08286100 | -2.61788900 | -1.69580000 |
| H  | -3.22013000 | -3.16037700 | -2.63650200 |
| H  | -4.06914000 | -2.60328900 | -1.21827900 |
| C  | -2.07331300 | -3.35991900 | -0.81664300 |
| H  | -2.43187100 | -4.37366900 | -0.60723000 |
| H  | -1.13959900 | -3.47308100 | -1.38059600 |
| C  | -2.93298500 | -2.78340400 | 1.50268400  |
| H  | -3.10454300 | -3.83855900 | 1.73603300  |
| H  | -2.73120500 | -2.27213700 | 2.44706700  |
| H  | -3.87252500 | -2.39203900 | 1.10585900  |
| C  | -0.54553800 | -3.39833100 | 1.14958700  |
| H  | -0.76194100 | -4.46936800 | 1.20936500  |
| H  | 0.35930900  | -3.26924400 | 0.55055100  |
| H  | -0.32785700 | -3.05341400 | 2.16248800  |
| C  | -3.56973800 | 0.02671600  | -0.08917800 |
| H  | -4.35063000 | -0.75014700 | -0.05288100 |
| O  | -3.83850800 | 1.12972600  | 0.36500200  |
| H  | -0.13538000 | 1.64172300  | 1.94706600  |
| H  | 0.74980400  | 0.73516700  | 0.66900200  |
| N  | 2.42643600  | 0.30868400  | 0.01549600  |
| Si | 3.41959500  | -0.10530500 | 1.32088100  |
| Si | 2.72182500  | 0.50388100  | -1.63434800 |
| C  | 1.88213200  | -0.84307000 | -2.71497900 |
| H  | 2.04259700  | -0.66988100 | -3.78577600 |
| H  | 2.29064700  | -1.82989200 | -2.47109500 |
| H  | 0.79950000  | -0.89664200 | -2.55097900 |
| C  | 4.55030400  | 0.45286300  | -2.18671700 |
| H  | 4.63221400  | 0.55252800  | -3.27556600 |
| H  | 5.12711500  | 1.26556700  | -1.73481800 |
| H  | 5.03156100  | -0.48962400 | -1.90483000 |
| C  | 2.07242600  | 2.17370700  | -2.30675800 |
| H  | 2.22272800  | 2.25953200  | -3.38961600 |
| H  | 1.00774400  | 2.33371500  | -2.10752600 |
| H  | 2.60980600  | 2.99958500  | -1.82841800 |
| C  | 3.89145300  | -1.95805100 | 1.39693600  |
| H  | 2.99533800  | -2.58803900 | 1.42776000  |
| H  | 4.46446100  | -2.25214400 | 0.51064600  |
| H  | 4.49880900  | -2.19682000 | 2.27827100  |
| C  | 5.07495000  | 0.84301700  | 1.43149800  |
| H  | 5.72907100  | 0.61676600  | 0.58423400  |
| H  | 4.90350500  | 1.92498800  | 1.43493000  |
| H  | 5.62042200  | 0.58739000  | 2.34782600  |
| C  | 2.56668800  | 0.25093500  | 2.99672700  |

|   |             |             |            |
|---|-------------|-------------|------------|
| H | 3.24203700  | 0.01691400  | 3.82738500 |
| H | 2.28995600  | 1.30723900  | 3.08364600 |
| H | 1.65998100  | -0.34671200 | 3.13994200 |
| K | -3.43076500 | 3.67290700  | 0.83604700 |

Cartesian coordinates for optimized TS-5<sub>H2</sub> with KHMDS

|    |             |             |             |
|----|-------------|-------------|-------------|
| C  | -2.29270400 | -0.76656200 | 0.48359200  |
| C  | -2.57433300 | -0.12130600 | 1.85426100  |
| C  | -1.29657700 | 0.45209200  | 2.50583200  |
| C  | -1.60299200 | 0.25881700  | -0.47145500 |
| H  | -1.52272600 | 0.98921200  | 3.43070100  |
| H  | -3.31325900 | 0.68275200  | 1.74735700  |
| H  | -3.01321100 | -0.85710800 | 2.53319100  |
| H  | -1.51053900 | -1.52268200 | 0.63879500  |
| H  | -0.61000100 | -0.37038800 | 2.74805500  |
| C  | -0.57380900 | 1.38314600  | 1.55951400  |
| O  | -0.20610400 | 2.51353300  | 1.91902700  |
| C  | -3.50234000 | -1.53657800 | -0.14716100 |
| C  | -1.24655600 | -0.38975500 | -1.83159400 |
| H  | -0.44264500 | -1.10666200 | -1.63613200 |
| H  | -0.82482900 | 0.36974600  | -2.49988700 |
| C  | -2.44952600 | -1.08369600 | -2.47363000 |
| H  | -2.13243200 | -1.57889900 | -3.39820900 |
| H  | -3.20102200 | -0.33944100 | -2.76831700 |
| C  | -3.06003800 | -2.11451000 | -1.51783100 |
| H  | -3.92153200 | -2.60357400 | -1.98906500 |
| H  | -2.31702100 | -2.90382400 | -1.33859300 |
| C  | -4.76006300 | -0.65832500 | -0.32015200 |
| H  | -5.57038900 | -1.25753800 | -0.74971100 |
| H  | -5.11694200 | -0.27139500 | 0.63929400  |
| H  | -4.60334800 | 0.19701400  | -0.98198600 |
| C  | -3.87317500 | -2.73065800 | 0.75841000  |
| H  | -4.61794000 | -3.36118200 | 0.26078500  |
| H  | -2.99954400 | -3.35574800 | 0.97365700  |
| H  | -4.30548400 | -2.41184200 | 1.71157700  |
| C  | -0.32894500 | 0.85642100  | 0.19787500  |
| H  | 0.60361300  | 0.11352100  | 0.21137600  |
| H  | 0.07488100  | 1.63240700  | -0.45446500 |
| N  | 2.14335000  | -0.49053500 | 0.00386900  |
| Si | 2.32202200  | -2.13857800 | 0.38590600  |
| Si | 3.28551900  | 0.64837400  | -0.51409000 |
| C  | 2.51474400  | 2.42016600  | -0.68149400 |
| H  | 3.30436100  | 3.14416000  | -0.91473500 |
| H  | 1.77498700  | 2.46088600  | -1.49435900 |
| H  | 2.04861800  | 2.71144100  | 0.26868100  |
| C  | 4.04355800  | 0.31897200  | -2.23585200 |
| H  | 4.60470800  | -0.62292800 | -2.24210700 |
| H  | 3.26131000  | 0.23181300  | -2.99942600 |
| H  | 4.73292800  | 1.11352000  | -2.54884400 |
| C  | 4.75224700  | 0.94376800  | 0.67135500  |
| H  | 5.41608400  | 1.73977100  | 0.31034200  |
| H  | 4.39585400  | 1.22974800  | 1.66809300  |
| H  | 5.35770000  | 0.03916700  | 0.79074700  |
| C  | 4.10597300  | -2.71495700 | 0.74897400  |
| H  | 4.77181000  | -2.53842500 | -0.10396700 |
| H  | 4.52927000  | -2.18727800 | 1.61079900  |
| H  | 4.13672600  | -3.78912000 | 0.97020000  |
| C  | 1.31790500  | -2.60405700 | 1.94724900  |
| H  | 0.24042800  | -2.44889600 | 1.80721000  |
| H  | 1.45535800  | -3.65828400 | 2.21736500  |
| H  | 1.63060300  | -1.99810300 | 2.80601500  |
| C  | 1.68417500  | -3.30889100 | -0.98675800 |
| H  | 2.22316600  | -3.13911300 | -1.92605400 |
| H  | 1.81085000  | -4.36493500 | -0.71673000 |
| H  | 0.61763800  | -3.15326200 | -1.19415600 |
| C  | -2.40889200 | 1.48376800  | -0.71389700 |
| N  | -2.82474600 | 2.56306000  | -0.86726800 |
| K  | -0.51299600 | 4.15290800  | -0.05183000 |

Cartesian coordinates for optimized **TS-5<sub>H4</sub>** with **KHMDS**

|    |             |             |             |
|----|-------------|-------------|-------------|
| C  | 1.68680800  | -1.01132300 | -0.34308300 |
| C  | 1.07562600  | -0.17009800 | -1.48273200 |
| C  | 0.07142800  | 0.91798400  | -1.02867700 |
| C  | 0.92551400  | 0.75376100  | 1.32069400  |
| C  | 2.14678300  | -0.10427200 | 0.85359200  |
| H  | 1.88324400  | 0.30766200  | -2.05377500 |
| H  | 0.56079600  | -0.83840200 | -2.17796000 |
| H  | 0.86785900  | -1.59443000 | 0.09681400  |
| H  | 1.18505800  | 1.36171200  | 2.19200100  |
| H  | 0.10459600  | 0.07572600  | 1.58271400  |
| C  | 0.47720700  | 1.64136200  | 0.17547500  |
| O  | 0.46894400  | 2.87987300  | 0.31377000  |
| C  | 2.75567100  | -2.06576100 | -0.80061200 |
| C  | 2.69654200  | -0.95191000 | 2.02701900  |
| H  | 1.84122000  | -1.50089100 | 2.43905500  |
| H  | 3.06229400  | -0.29065000 | 2.82094500  |
| C  | 3.77561300  | -1.93993500 | 1.57942600  |
| H  | 4.08047300  | -2.55457400 | 2.43387900  |
| H  | 4.67353400  | -1.39539500 | 1.26010500  |
| C  | 3.25653000  | -2.83639100 | 0.44987500  |
| H  | 4.03754500  | -3.54202500 | 0.14157600  |
| H  | 2.42818900  | -3.44381400 | 0.83957400  |
| C  | 3.95807700  | -1.45120900 | -1.55082400 |
| H  | 4.64530100  | -2.24989700 | -1.85077500 |
| H  | 3.64494900  | -0.93593400 | -2.46353900 |
| H  | 4.53125800  | -0.74050000 | -0.95062800 |
| C  | 2.08819700  | -3.09209200 | -1.74020700 |
| H  | 2.78587400  | -3.90863400 | -1.95698800 |
| H  | 1.19158200  | -3.52816600 | -1.28887000 |
| H  | 1.79969600  | -2.64782800 | -2.69702200 |
| H  | -0.15236500 | 1.61162300  | -1.84356300 |
| H  | -0.95330500 | 0.41707000  | -0.71267500 |
| N  | -2.47746100 | -0.16330500 | -0.13517500 |
| Si | -3.58227400 | 1.12735100  | -0.10823300 |
| Si | -2.66128800 | -1.81814000 | 0.17235700  |
| C  | -2.03880000 | -2.89491300 | -1.28140000 |
| H  | -2.05893500 | -3.96671300 | -1.04570600 |
| H  | -2.66549800 | -2.73781900 | -2.16711400 |
| H  | -1.01239200 | -2.63765200 | -1.56882800 |
| C  | -4.43627400 | -2.43675000 | 0.51952800  |
| H  | -4.44062600 | -3.51033300 | 0.74713800  |
| H  | -4.88670700 | -1.91833000 | 1.37409600  |
| H  | -5.09229000 | -2.27896900 | -0.34311200 |
| C  | -1.66758900 | -2.41356300 | 1.70645900  |
| H  | -1.79996400 | -3.48820800 | 1.88546100  |
| H  | -0.58783800 | -2.23703700 | 1.61155000  |
| H  | -2.00248200 | -1.88487500 | 2.60715300  |
| C  | -5.28351300 | 0.78851300  | -0.91306300 |
| H  | -5.16559500 | 0.43491200  | -1.94422700 |
| H  | -5.85228600 | 0.02724900  | -0.36900500 |
| H  | -5.89612200 | 1.69888600  | -0.94224400 |
| C  | -3.96902200 | 1.77995800  | 1.64954400  |
| H  | -4.43601400 | 1.00102100  | 2.26435400  |
| H  | -3.05132100 | 2.09079800  | 2.16436300  |
| H  | -4.64989400 | 2.64087600  | 1.63451300  |
| C  | -2.91292100 | 2.64734000  | -1.06257400 |
| H  | -3.65710900 | 3.45370800  | -1.05331000 |
| H  | -1.98972400 | 3.04541900  | -0.62736400 |
| H  | -2.71148800 | 2.39885300  | -2.11192200 |
| C  | 3.14925300  | 0.90426300  | 0.44346800  |
| N  | 3.82525900  | 1.80845300  | 0.15804700  |
| K  | 2.49639200  | 4.21009600  | -0.24348000 |

Cartesian coordinates for optimized **TS-6<sub>H2</sub>** with **KHMDS**

|   |            |             |             |
|---|------------|-------------|-------------|
| C | 2.14187000 | -0.95291700 | -0.40882100 |
|---|------------|-------------|-------------|

|    |             |             |             |
|----|-------------|-------------|-------------|
| C  | 2.44522600  | -0.56087600 | -1.87214900 |
| C  | 1.22881200  | 0.08656700  | -2.57580400 |
| C  | 1.53456900  | 0.22501400  | 0.39760600  |
| H  | 1.50363500  | 0.51050000  | -3.54533500 |
| H  | 3.29462100  | 0.12415700  | -1.91554100 |
| H  | 2.73031400  | -1.45367900 | -2.43474900 |
| H  | 1.26579500  | -1.61363000 | -0.45697200 |
| H  | 0.46050300  | -0.67991400 | -2.75240100 |
| C  | 0.57377000  | 1.15865400  | -1.73262200 |
| O  | 0.24617800  | 2.25725100  | -2.21154900 |
| C  | 3.22755300  | -1.84520400 | 0.29908100  |
| C  | 1.20203500  | -0.15637000 | 1.84718600  |
| H  | 0.31304000  | -0.79527200 | 1.79261000  |
| H  | 0.90645800  | 0.74323400  | 2.39489400  |
| C  | 2.35060800  | -0.89133600 | 2.54240400  |
| H  | 2.03631500  | -1.17872600 | 3.55196400  |
| H  | 3.20989000  | -0.21981200 | 2.67144100  |
| C  | 2.75608100  | -2.13752000 | 1.74875200  |
| H  | 3.55189500  | -2.68016400 | 2.27362500  |
| H  | 1.89310200  | -2.81661400 | 1.70991200  |
| C  | 4.65508600  | -1.26048700 | 0.32356500  |
| H  | 4.74892000  | -0.38119800 | 0.96157200  |
| H  | 5.34694900  | -2.02277400 | 0.69961300  |
| H  | 4.99336200  | -0.97388500 | -0.67616400 |
| C  | 3.29627900  | -3.20012000 | -0.44327500 |
| H  | 3.90875700  | -3.90632800 | 0.12767500  |
| H  | 2.30254200  | -3.64395500 | -0.56693900 |
| H  | 3.75303400  | -3.10638800 | -1.43330700 |
| C  | 0.31199300  | 0.79429000  | -0.32473500 |
| H  | -0.65274700 | 0.07062500  | -0.25391100 |
| H  | -0.06961100 | 1.63509300  | 0.24722300  |
| N  | -2.15067000 | -0.47810900 | 0.05754400  |
| Si | -2.57544900 | -2.03542200 | -0.50278400 |
| Si | -3.20113600 | 0.66824700  | 0.74302500  |
| C  | -2.52398800 | 2.47478900  | 0.54305400  |
| H  | -3.31098100 | 3.20015900  | 0.77963900  |
| H  | -1.68945300 | 2.65201300  | 1.23691600  |
| H  | -2.20346500 | 2.63204800  | -0.49495600 |
| C  | -3.45771300 | 0.48965000  | 2.62481600  |
| H  | -4.09102300 | 1.28455800  | 3.03890100  |
| H  | -3.93253700 | -0.46913700 | 2.86145300  |
| H  | -2.49852500 | 0.51284000  | 3.15629100  |
| C  | -4.94121700 | 0.76648000  | -0.03446100 |
| H  | -4.88278700 | 1.00414400  | -1.10287700 |
| H  | -5.47800300 | -0.18438000 | 0.05704700  |
| H  | -5.55627600 | 1.53635100  | 0.44825700  |
| C  | -1.03004000 | -3.13103400 | -0.75451800 |
| H  | -1.31994700 | -4.14333700 | -1.06074300 |
| H  | -0.36974300 | -2.73832500 | -1.53749500 |
| H  | -0.44603100 | -3.22380900 | 0.16904200  |
| C  | -3.69215900 | -3.02372000 | 0.69057000  |
| H  | -3.90954400 | -4.02675100 | 0.30277300  |
| H  | -3.21287300 | -3.14176500 | 1.66938400  |
| H  | -4.65353300 | -2.52390900 | 0.85733500  |
| C  | -3.46056600 | -2.03981700 | -2.19460900 |
| H  | -4.41676300 | -1.50706800 | -2.14544400 |
| H  | -2.85125000 | -1.53957300 | -2.95721900 |
| H  | -3.66620300 | -3.05791300 | -2.54855200 |
| N  | 2.50101200  | 1.48834900  | 0.48508100  |
| O  | 3.61366900  | 1.46861800  | -0.01579400 |
| O  | 2.03168500  | 2.51548900  | 1.01482400  |
| K  | 0.24055300  | 4.07811800  | -0.34962000 |

Cartesian coordinates for optimized **TS-6<sub>H4</sub>** with **KHMDS**

|   |             |             |             |
|---|-------------|-------------|-------------|
| C | 1.58636300  | -0.93016300 | -0.41782700 |
| C | 1.00702700  | -0.01208900 | -1.51348200 |
| C | -0.03664900 | 1.00243700  | -1.00102000 |
| C | 0.74960300  | 0.68845400  | 1.36395300  |



|    |             |             |             |
|----|-------------|-------------|-------------|
| C  | 1.93797700  | -0.19695100 | 0.91407800  |
| H  | 1.81845100  | 0.51846500  | -2.02413300 |
| H  | 0.52359400  | -0.64293500 | -2.26389200 |
| H  | 0.74627500  | -1.55800300 | -0.09180400 |
| H  | 0.98996500  | 1.23716000  | 2.27919400  |
| H  | -0.10271400 | 0.02414700  | 1.56181900  |
| C  | 0.30758600  | 1.64432800  | 0.27694000  |
| O  | 0.18876300  | 2.85684400  | 0.52230600  |
| C  | 2.68374900  | -1.94173300 | -0.90475400 |
| C  | 2.33661500  | -1.19244000 | 2.01103400  |
| H  | 1.41486200  | -1.72614700 | 2.27003000  |
| H  | 2.65217700  | -0.65069600 | 2.90664900  |
| C  | 3.40118800  | -2.20516500 | 1.57125900  |
| H  | 3.52995700  | -2.94882700 | 2.36558200  |
| H  | 4.36795000  | -1.70369100 | 1.46363600  |
| C  | 3.00394700  | -2.90638200 | 0.26735300  |
| H  | 3.80079900  | -3.59293900 | -0.04424000 |
| H  | 2.11703900  | -3.52717900 | 0.45350000  |
| C  | 3.97952700  | -1.26469700 | -1.40396300 |
| H  | 4.65027600  | -2.02654200 | -1.81557100 |
| H  | 3.77923900  | -0.54418900 | -2.20254500 |
| H  | 4.53405200  | -0.74874900 | -0.61661400 |
| C  | 2.11840200  | -2.78983100 | -2.06357000 |
| H  | 2.80879600  | -3.60846000 | -2.29440800 |
| H  | 1.15035300  | -3.23133300 | -1.80638100 |
| H  | 1.98979000  | -2.20492400 | -2.97893500 |
| H  | -0.28213200 | 1.74874200  | -1.76398000 |
| H  | -1.03456700 | 0.45575600  | -0.74099300 |
| N  | -2.57074700 | -0.21893800 | -0.09465300 |
| Si | -3.66086200 | 1.06960500  | 0.08614800  |
| Si | -2.73361700 | -1.90067300 | -0.01756500 |
| C  | -2.10845000 | -2.75802100 | -1.61111400 |
| H  | -2.11365600 | -3.85215200 | -1.52506000 |
| H  | -2.74149500 | -2.48912600 | -2.46487600 |
| H  | -1.08643800 | -2.45032700 | -1.86427200 |
| C  | -4.49177400 | -2.59681000 | 0.25855400  |
| H  | -4.47462000 | -3.69302600 | 0.30807000  |
| H  | -4.92814300 | -2.23293000 | 1.19608200  |
| H  | -5.17142400 | -2.31201100 | -0.55144100 |
| C  | -1.70957700 | -2.68549800 | 1.40725800  |
| H  | -1.82869800 | -3.77579800 | 1.44334100  |
| H  | -0.63372000 | -2.48562000 | 1.31537800  |
| H  | -2.03084000 | -2.28521600 | 2.37643700  |
| C  | -5.46114600 | 0.74172500  | -0.46701800 |
| H  | -5.49802800 | 0.40166200  | -1.50871500 |
| H  | -5.94797600 | -0.02491500 | 0.14449000  |
| H  | -6.06597200 | 1.65474800  | -0.39468300 |
| C  | -3.78514200 | 1.71646700  | 1.88311600  |
| H  | -4.15320900 | 0.93352800  | 2.55698200  |
| H  | -2.80245900 | 2.03102500  | 2.25633900  |
| H  | -4.46300000 | 2.57526000  | 1.97146800  |
| C  | -3.12942100 | 2.59759600  | -0.94491700 |
| H  | -3.88629500 | 3.38842400  | -0.86825500 |
| H  | -2.17873000 | 3.01816400  | -0.59842800 |
| H  | -3.02444900 | 2.34187900  | -2.00660800 |
| N  | 3.09778500  | 0.82843800  | 0.73047100  |
| O  | 4.04787900  | 0.82149500  | 1.49481900  |
| O  | 2.97273300  | 1.67958000  | -0.17190700 |
| K  | 1.96813100  | 4.05392300  | -0.75637200 |

## 4. References

---

1. M. J. Frisch, G. W. Trucks, H. B. Schlegel, G. E. Scuseria, M. A. Robb, J. R. Cheeseman, G. Scalmani, V. Barone, B. Mennucci, G. A. Peterson, H. Nakatsuji, M. Caricato, X. Li, H. P. Hratchian, A. F. Izmaylov, J. Bloino, G. Zheng, J. L. Sonnenberg, M. Hada, M. Ehara, K. Toyota, TR. Fukuda, J. Hasegawa, M/ Ishida, T. Nakajima, Y. Honda, O. Kitao, H. Nakai, T. Vreven, K. Throssell, J. A. Montgomery, Jr., J. E. Peralta, F. Ogliaro, M. Bearpark, J. J. Heyd, E. Brothers, K. N. Kudin, V. N. Staroverov, R. Kobayashi, J. Normand, K. Raghacachari, A. Rendell, J. C. Burant, S. S. Iyengar, J. Tomasi, M. Cossi, N/ Rega, J. M. Millam, M. Klene, J. E. Knox, J. B. Cross, V. Bakken, C. adamo, J. Jaramillo, R. E. Stratmann, R. Gomperts, O. Yazyev, A. J. Austin, R. Cammi, C. Pomelli, J. W. Ochterski, R. L. Martin, K. Morokuma, V. G. Zakrzewski, G. A. Voth, P. Salvador, J. J. Dannenberg, S. Dapprich, A. D. Daniels, Ö. Farkas, J. B. Foresman, J. V. Ortiz, J. Cioslowski and D. J. Fox, Gaussian 09, Revision C.01; Gaussian, Inc.: Wallingford, CT, 2009.
2. D. A. Lightner, J. E. Gurst, *Organic Conformational Analysis and Stereochemistry from Circular Dichroism Spectroscopy*. Wiley-VCH, **2000**, 496 pages.
3. V. Angamuthu, D.-F. Tai, *Molecules*, **2020**, 25, 831.
